# Supplementary material
Source: PubMed Central journal article supplement (PMC5609127)

Supporting information for

# Ligand Dependent Switch from RXR Homo- to RXR-NURR1 Heterodimerization

*Marcel Scheepstra,<sup>†</sup> Sebastian A. Andrei,<sup>†</sup> Rens M. J. M. de Vries,<sup>†</sup> Femke A. Meijer,<sup>†</sup> Jian-Nong Ma,<sup>§</sup> Ethan S. Burstein,<sup>§</sup> Roger Olsson,<sup>‡</sup> Christian Ottmann,<sup>†</sup> Lech-Gustav Milroy,<sup>†\*</sup> and Luc Brunsveld<sup>†\*</sup>*

<sup>†</sup> Department of Biomedical Engineering and Institute for Complex Molecular Systems, Laboratory of Chemical Biology, Technische Universiteit Eindhoven, Den Dolech 2, 5612 AZ Eindhoven, The Netherlands

<sup>§</sup> ACADIA Pharmaceuticals Inc., San Diego, California 92130, United States

<sup>‡</sup> Chemical Biology & Therapeutics, Department of Experimental Medical Science, Department of Experimental Medical Science, Lund University, SE-221 00 Lund, Sweden

## Supporting Information Table of Contents

Table S1. Crystallographic statistics for RXR $\alpha$  complexes.....S5

Figure S1. <sup>1</sup>H NMR spectrum of (*E*)-methyl 3-(6-methoxy-[1,1':3',1''-terphenyl]-3-yl)acrylate (13).....S6

Figure S2. <sup>13</sup>C NMR spectrum of (*E*)-methyl 3-(6-methoxy-[1,1':3',1''-terphenyl]-3-yl)acrylate (13).....S7

Figure S3. <sup>1</sup>H NMR spectrum of (*E*)-3-(6-hydroxy-[1,1':3',1''-terphenyl]-3-yl)acrylic acid (2).....S8

Figure S4. <sup>13</sup>C NMR spectrum of (*E*)-3-(6-hydroxy-[1,1':3',1''-terphenyl]-3-yl)acrylic acid (2).....S9

Figure S5. <sup>1</sup>H NMR spectrum of (*E*)-methyl 3-(3'-benzyl-6-methoxy-[1,1'-biphenyl]-3-yl)acrylate (14).....S10

Figure S6. <sup>13</sup>C NMR spectrum of (*E*)-methyl 3-(3'-benzyl-6-methoxy-[1,1'-biphenyl]-3-yl)acrylate (14).....S11

Figure S7. <sup>1</sup>H NMR spectrum of (*E*)-3-(3'-benzyl-6-hydroxy-[1,1'-biphenyl]-3-yl)acrylic acid (3).....S12

Figure S8. <sup>13</sup>C NMR spectrum of (*E*)-3-(3'-benzyl-6-hydroxy-[1,1'-biphenyl]-3-yl)acrylic acid (3).....S13

Figure S9. <sup>1</sup>H NMR spectrum of (*E*)-methyl 3-(3'-isopropyl-6-methoxy-[1,1'-biphenyl]-3-yl)acrylate (15).....S14

Figure S10. <sup>13</sup>C NMR spectrum of (*E*)-methyl 3-(3'-isopropyl-6-methoxy-[1,1'-biphenyl]-3-yl)acrylate (15).....S15

Figure S11. <sup>1</sup>H NMR spectrum of (*E*)-3-(6-hydroxy-3'-isopropyl-[1,1'-biphenyl]-3-yl)acrylic acid (4).....S16

Figure S12. <sup>13</sup>C NMR spectrum of (*E*)-3-(6-hydroxy-3'-isopropyl-[1,1'-biphenyl]-3-yl)acrylic acid (4).....S17

Figure S13. <sup>1</sup>H NMR spectrum of 1-bromo-3-propylbenzene.....S18

Figure S14. <sup>13</sup>C NMR spectrum of 1-bromo-3-propylbenzene.....S19

Figure S15. <sup>1</sup>H NMR spectrum of (*E*)-methyl 3-(6-methoxy-3'-propyl-[1,1'-biphenyl]-3-yl)acrylate (16).....S20

Figure S16. <sup>13</sup>C NMR spectrum of (*E*)-methyl 3-(6-methoxy-3'-propyl-[1,1'-biphenyl]-3-yl)acrylate (16).....S21

Figure S17. <sup>1</sup>H NMR spectrum of (*E*)-3-(6-hydroxy-3'-propyl-[1,1'-biphenyl]-3-yl)acrylic acid (5).....S22

Figure S18. <sup>13</sup>C NMR spectrum of (*E*)-3-(6-hydroxy-3'-propyl-[1,1'-biphenyl]-3-yl)acrylic acid (5).....S23

Figure S19. <sup>1</sup>H NMR spectrum of 3-chloro-2-methyl-1,1'-biphenyl (19).....S24

Figure S20. <sup>13</sup>C NMR spectrum of 3-chloro-2-methyl-1,1'-biphenyl (19).....S25

Figure S21. <sup>1</sup>H NMR spectrum of (*E*)-methyl 3-(6-(methoxymethoxy)-2'-methyl-[1,1':3',1''-terphenyl]-3-yl)acrylate (21).....S26

Figure S22. <sup>13</sup>C NMR spectrum of (*E*)-methyl 3-(6-(methoxymethoxy)-2'-methyl-[1,1':3',1''-terphenyl]-3-yl)acrylate (21).....S27

Figure S23. <sup>1</sup>H NMR spectrum of (*E*)-3-(6-hydroxy-2'-methyl-[1,1':3',1''-terphenyl]-3-yl)acrylic acid (6).....S28

Figure S24. <sup>13</sup>C NMR spectrum of (*E*)-3-(6-hydroxy-2'-methyl-[1,1':3',1''-terphenyl]-3-yl)acrylic acid (6).....S29

Figure S25. <sup>1</sup>H NMR spectrum of 3-chloro-4-methyl-1,1'-biphenyl (20).....S30

Figure S26. <sup>13</sup>C NMR spectrum of 3-chloro-4-methyl-1,1'-biphenyl (20).....S31

Figure S27. <sup>1</sup>H NMR spectrum of (*E*)-methyl 3-(6-(methoxymethoxy)-6'-methyl-[1,1':3',1''-terphenyl]-3-yl)acrylate (22).....S32

Figure S28. <sup>13</sup>C NMR spectrum of (*E*)-methyl 3-(6-(methoxymethoxy)-6'-methyl-[1,1':3',1''-terphenyl]-3-yl)acrylate (22).....S33

Figure S29. <sup>1</sup>H NMR spectrum of (*E*)-3-(6-hydroxy-6'-methyl-[1,1':3',1''-terphenyl]-3-yl)acrylic acid (7).....S34

Figure S30. <sup>13</sup>C NMR spectrum of (*E*)-3-(6-hydroxy-6'-methyl-[1,1':3',1''-terphenyl]-3-yl)acrylic acid (7).....S35

Figure S31. <sup>1</sup>H NMR spectrum of (*E*)-methyl 3-(5'-allyl-6-(methoxymethoxy)-2'-propoxy-[1,1'-biphenyl]-3-yl)acrylate (25).....S36

Figure S32. <sup>13</sup>C NMR spectrum of (*E*)-methyl 3-(5'-allyl-6-(methoxymethoxy)-2'-propoxy-[1,1'-biphenyl]-3-yl)acrylate (25).....S37

Figure S33. <sup>1</sup>H NMR spectrum of (*E*)-3-(5'-allyl-6-hydroxy-2'-propoxy-[1,1'-biphenyl]-3-yl)acrylic acid (9).....S38

Figure S34. <sup>13</sup>C NMR spectrum of (*E*)-3-(5'-allyl-6-hydroxy-2'-propoxy-[1,1'-biphenyl]-3-yl)acrylic acid (9).....S39

Figure S35. <sup>1</sup>H NMR spectrum of (*E*)-methyl 3-(5'-allyl-2'-(hexyloxy)-6-(methoxymethoxy)-[1,1'-biphenyl]-3-yl)acrylate (26).....S40

Figure S36. <sup>13</sup>C NMR spectrum of (*E*)-methyl 3-(5'-allyl-2'-(hexyloxy)-6-(methoxymethoxy)-[1,1'-biphenyl]-3-yl)acrylate (26).....S41

Figure S37. <sup>1</sup>H NMR spectrum of (*E*)-3-(5'-allyl-2'-(hexyloxy)-6-hydroxy-[1,1'-biphenyl]-3-yl)acrylic acid (10).....S42

Figure S38. <sup>13</sup>C NMR spectrum of (*E*)-3-(5'-allyl-2'-(hexyloxy)-6-hydroxy-[1,1'-biphenyl]-3-yl)acrylic acid (10).....S43

Figure S39. <sup>1</sup>H NMR spectrum of 4-bromo-2-chloro-1-(methoxymethoxy)benzene.....S44

Figure S40. <sup>13</sup>C NMR spectrum of 4-bromo-2-chloro-1-(methoxymethoxy)benzene.....S45

Figure S41. <sup>1</sup>H NMR spectrum of (*E*)-methyl 3-(3-chloro-4-(methoxymethoxy)phenyl)acrylate.....S46

Figure S42. <sup>13</sup>C NMR spectrum of (*E*)-methyl 3-(3-chloro-4-(methoxymethoxy)phenyl)acrylate (17).....S47

Figure S43. <sup>1</sup>H NMR spectrum of (*E*)-methyl 3-(4-(methoxymethoxy)-3-(4,4,5,5-tetramethyl-1,3,2-dioxaborolan-2-yl)phenyl)acrylate (18).....S48

Figure S44. <sup>13</sup>C NMR spectrum of (*E*)-methyl 3-(4-(methoxymethoxy)-3-(4,4,5,5-tetramethyl-1,3,2-dioxaborolan-2-yl)phenyl)acrylate (18).....S49

Figure S45. <sup>1</sup>H NMR spectrum of 4-bromo-2-chloro-1-propoxybenzene.....S50

Figure S46. <sup>13</sup>C NMR spectrum of 4-bromo-2-chloro-1-propoxybenzene.....S51

Figure S47. <sup>1</sup>H NMR spectrum of 4-allyl-2-chloro-1-propoxybenzene (23).....S52

Figure S48. <sup>13</sup>C NMR spectrum of 4-allyl-2-chloro-1-propoxybenzene (23).....S53

Figure S49. <sup>1</sup>H NMR spectrum of 4-bromo-2-chloro-1-(hexyloxy)benzene.....S54

Figure S50. <sup>13</sup>C NMR spectrum of 4-bromo-2-chloro-1-(hexyloxy)benzene.....S55

Figure S51. <sup>1</sup>H NMR spectrum of 4-allyl-2-chloro-1-(hexyloxy)benzene (24).....S56

Figure S52. <sup>13</sup>C NMR spectrum of 4-allyl-2-chloro-1-(hexyloxy)benzene (24).....S57

Figure S53. LC-MS data for (*E*)-3-(6-hydroxy-[1,1':3',1''-terphenyl]-3-yl)acrylic acid (2).....S58

Figure S54. LC-MS data for (*E*)-3-(3'-benzyl-6-hydroxy-[1,1'-biphenyl]-3-yl)acrylic acid (3).....S59

Figure S55. LC-MS data for (*E*)-3-(6-hydroxy-3'-isopropyl-[1,1'-biphenyl]-3-yl)acrylic acid (4).....S60

Figure S56. LC-MS data for (*E*)-3-(6-hydroxy-2'-methyl-[1,1':3',1''-terphenyl]-3-yl)acrylic acid (6).....S61

Figure S57. LC-MS data for (*E*)-3-(6-hydroxy-6'-methyl-[1,1':3',1''-terphenyl]-3-yl)acrylic acid (7).....S62

Figure S58. LC-MS data for (*E*)-3-(5'-allyl-6-hydroxy-2'-propoxy-[1,1'-biphenyl]-3-yl)acrylic acid (9).....S63

Figure S59. LC-MS data for (*E*)-3-(5'-allyl-2'-(hexyloxy)-6-hydroxy-[1,1'-biphenyl]-3-yl)acrylic acid (10).....S64

Figure S60. Overview of side-chains displacements in the helices 5-7 region of the ligand binding domain for ligands 1, 3, 4, 6, and 7.

Figure S61. Overlay of the X-ray co-crystal structures of ligands 4 (grey) and 6 (green) bound to RXR $\alpha$  as zoom-in on the ligand binding pocket of RXR $\alpha$ .....S65

Figure S62. Overlay of the X-ray co-crystal structures of ligands 4 (grey) and 7 (blue) bound to RXR $\alpha$  as zoom-in on the ligand binding pocket of RXR $\alpha$ .....S66

**Table S1. Crystallographic statistics for RXR $\alpha$  complexes.**

|                                                                        | Ligand 3                         | Ligand 4                 | Ligand 6                         | Ligand 7                                      | Ligand 9                         |
|------------------------------------------------------------------------|----------------------------------|--------------------------|----------------------------------|-----------------------------------------------|----------------------------------|
| <b>Data collection</b>                                                 |                                  |                          |                                  |                                               |                                  |
| Resolution (Å)                                                         | 68.16-1.90<br>(1.94-1.90)        | 25.4-1.78<br>(1.82-1.78) | 67.49-2.70<br>(2.83-2.70)        | 99.21-2.00<br>(2.0-2.05)                      | 64.14-2.50<br>(2.50-2.60)        |
| Space group                                                            | P4 <sub>3</sub> 2 <sub>1</sub> 2 | P3 <sub>2</sub> 21       | P4 <sub>3</sub> 2 <sub>1</sub> 2 | P2 <sub>1</sub> 2 <sub>1</sub> 2 <sub>1</sub> | P4 <sub>3</sub> 2 <sub>1</sub> 2 |
| Cell parameters (Å)                                                    | a=b=63.16,<br>c=109.72           | a=b=77.65,<br>c=81.24    | a=b=67.49,<br>c=108.64           | a=71.70,<br>b=74.14,<br>c=99.21               | a=b=64.14,<br>c=111.98           |
| R <sub>merge</sub>                                                     | 0.079 (1.06)                     | 0.12 (1.69)              | 0.155<br>(0.929)                 | 0.12<br>(0.90)                                | 0.17<br>(0.98)                   |
| Average I/ $\sigma$ (I) <sup>a</sup>                                   | 22.1 (2.1)                       | 13.1 (2.3)               | 14.0 (3.8)                       | 13.1 (2.2)                                    | 12.0 (3.3)                       |
| CC <sub>1/2</sub> (%)                                                  | 99.9 (51.0)                      | 99.7 (84.2)              | 99.9 (86.2)                      | 99.7 (65.5)                                   | 99.7 (78.8)                      |
| Completeness (%) <sup>a</sup>                                          | 99.9 (99.2)                      | 99.6 (94.1)              | 100 (100)                        | 99.9 (99.1)                                   | 100 (100)                        |
| Redundancy <sup>a</sup>                                                | 20.9 (9.8)                       | 8.6 (4.7)                | 20.9 (21.2)                      | 11.0 (7.3)                                    | 14.9 (15.9)                      |
| <b>Refinement</b>                                                      |                                  |                          |                                  |                                               |                                  |
| Number of protein/solvent/ligand and atoms                             | 1831/127/25                      | 1861/335/21              | 1744/9/25                        | 3728/489/52                                   | 1766/76/25                       |
| R <sub>work</sub> /R <sub>free</sub> (%)                               | 19.7/24.9                        | 14.8/17.7                | 20.0/25.3                        | 17.1/22.9                                     | 19.3/24.5                        |
| Unique reflections used in refinement                                  | 21048                            | 27456                    | 7351                             | 36389                                         | 8601                             |
| R.m.s. deviations from ideal values bond lengths (Å) / bond angles (°) | 0.002 / 0.400                    | 0.018/1.36               | 0.001/0.400                      | 0.009/1.170                                   | 0.001/0.380                      |
| Average protein/solvent/ligand and B-factor (Å <sup>2</sup> )          | 47.1 / 48.3 / 35.7               | 15.0 / 32.9 / 9.84       | 62.4 / 46.5 / 54.5               | 32.8 / 42.4 / 24.5                            | 47.6 / 41.4 / 46.7               |
| Ramachandran favored (%)                                               | 98.2                             | 98.7                     | 98.1                             | 98.2                                          | 97.7                             |
| Ramachandran allowed (%)                                               | 1.8                              | 1.3                      | 1.9                              | 1.8                                           | 2.3                              |
| Ramachandran outliers (%)                                              | 0                                | 0                        | 0                                | 0                                             | 0                                |

<sup>a</sup> number in parentheses is for the highest resolution shell

<sup>b</sup> As reported by Aimless version 0.5.27

**Figure S1. <sup>1</sup>H NMR spectrum of (*E*)-methyl 3-(6-methoxy-[1,1':3',1''-terphenyl]-3-yl)acrylate (13)**

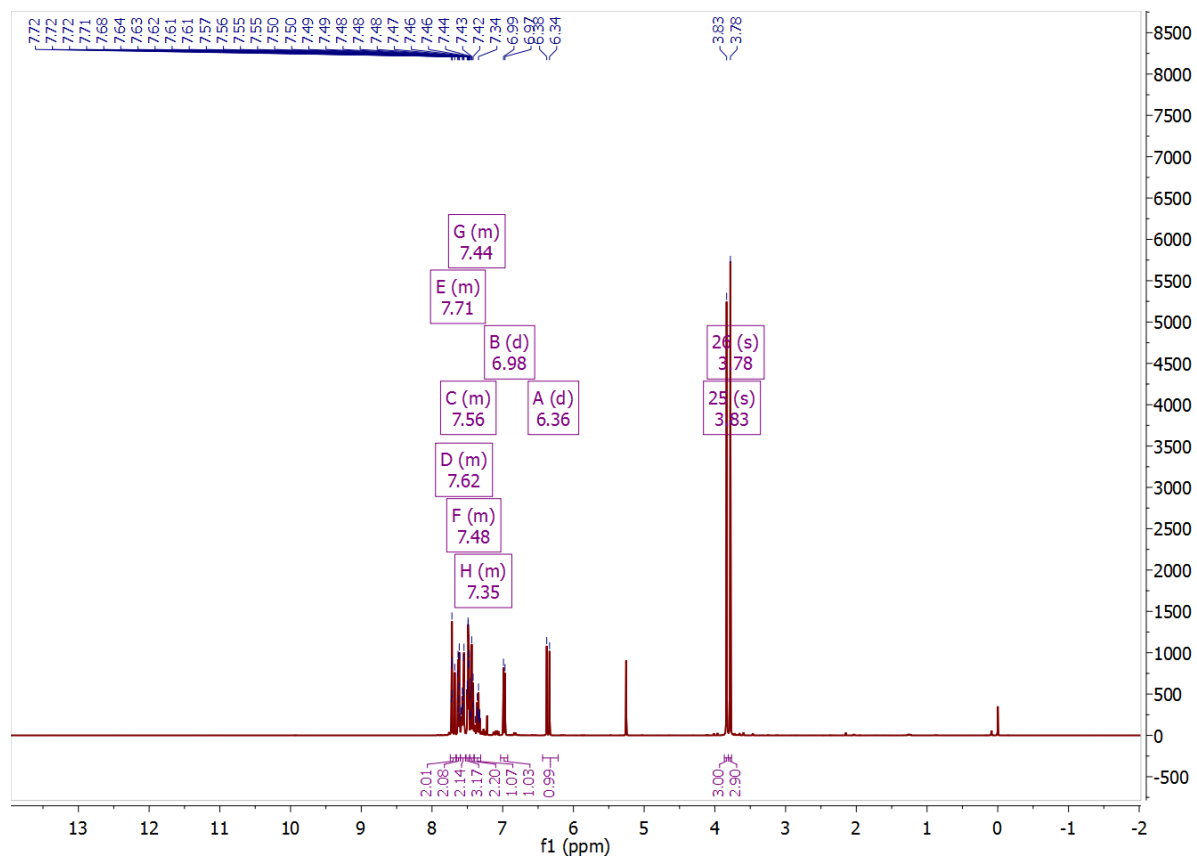

**Figure S2. <sup>13</sup>C NMR spectrum of (*E*)-methyl 3-(6-methoxy-[1,1':3',1''-terphenyl]-3-yl)acrylate (13)**

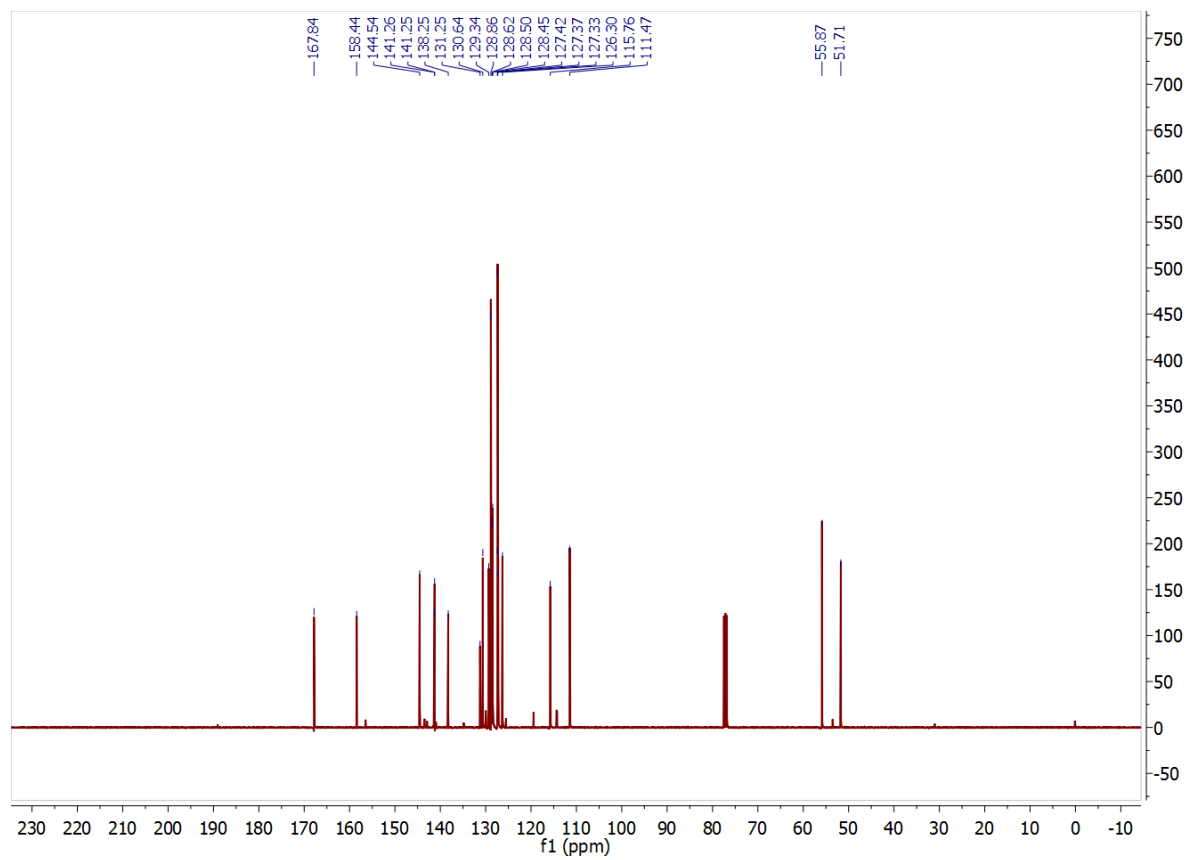

Figure S3. <sup>1</sup>H NMR spectrum of (*E*)-3-(6-hydroxy-[1,1':3',1''-terphenyl]-3-yl)acrylic acid (2)

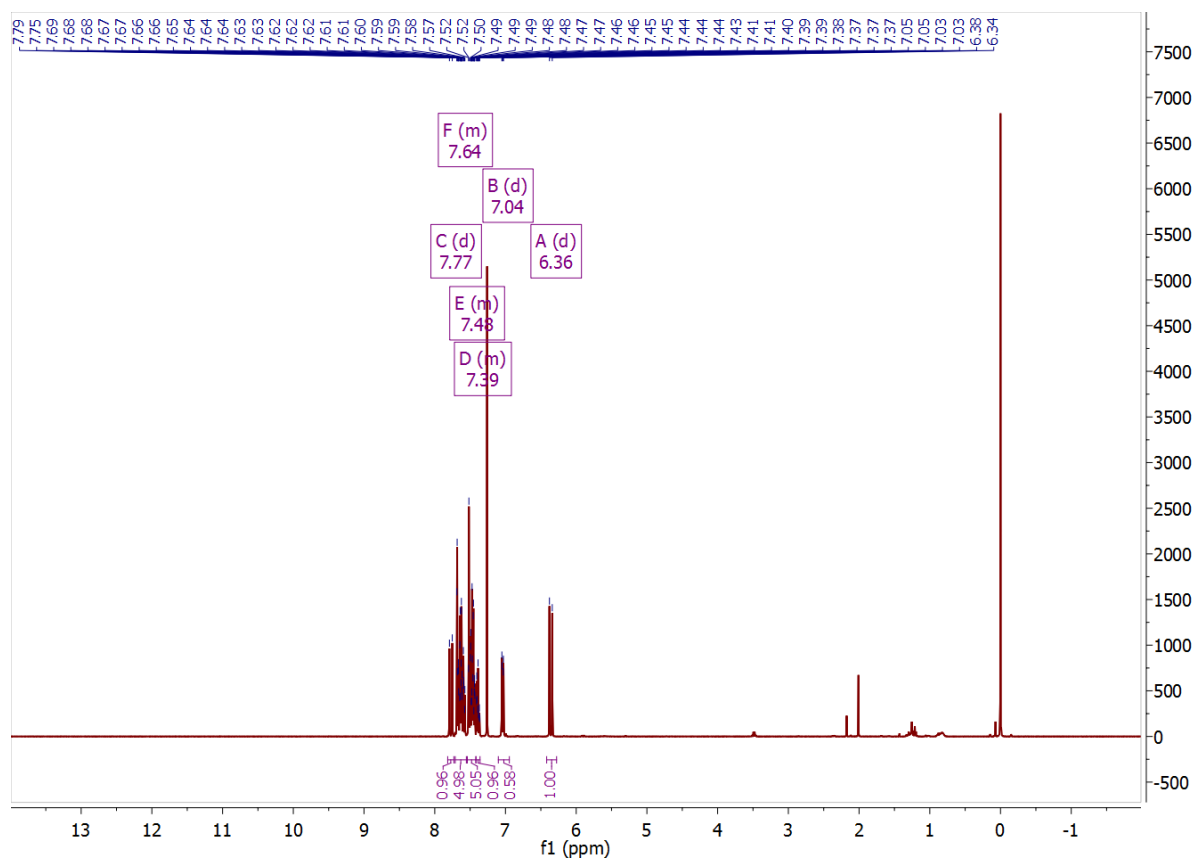



Figure S4. <sup>13</sup>C NMR spectrum of (*E*)-3-(6-hydroxy-[1,1':3',1''-terphenyl]-3-yl)acrylic acid (2)

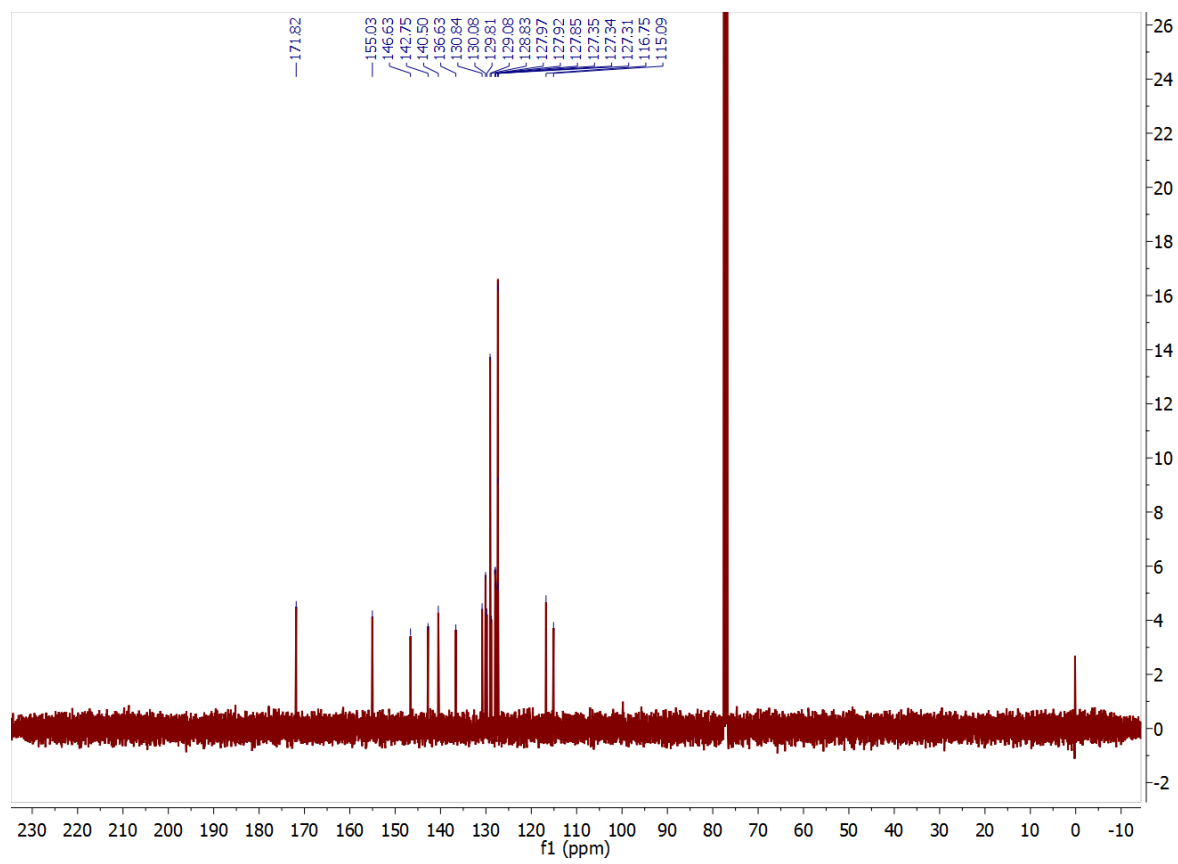

**Figure S5. <sup>1</sup>H NMR spectrum of (*E*)-methyl 3-(3'-benzyl-6-methoxy-[1,1'-biphenyl]-3-yl)acrylate (14)**

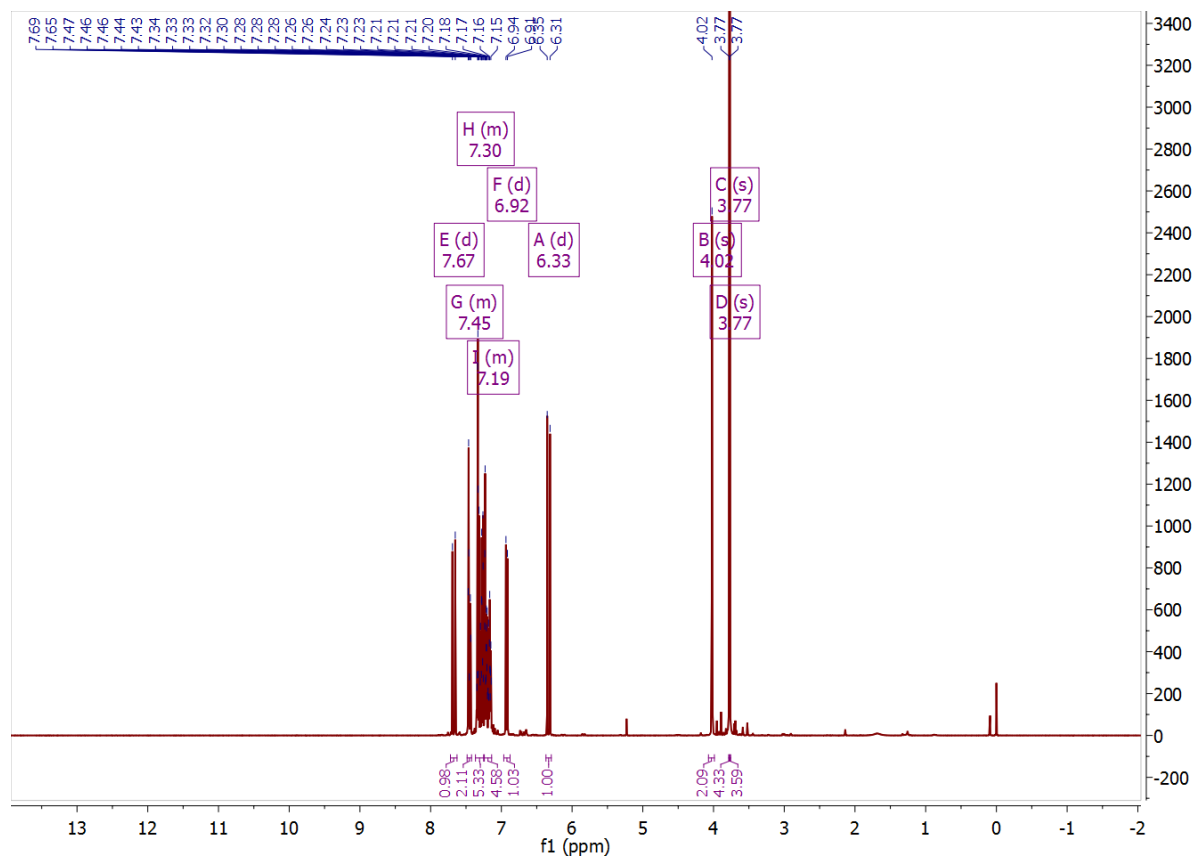

Figure S6. <sup>13</sup>C NMR spectrum of (*E*)-methyl 3-(3'-benzyl-6-methoxy-[1,1'-biphenyl]-3-yl)acrylate (14)

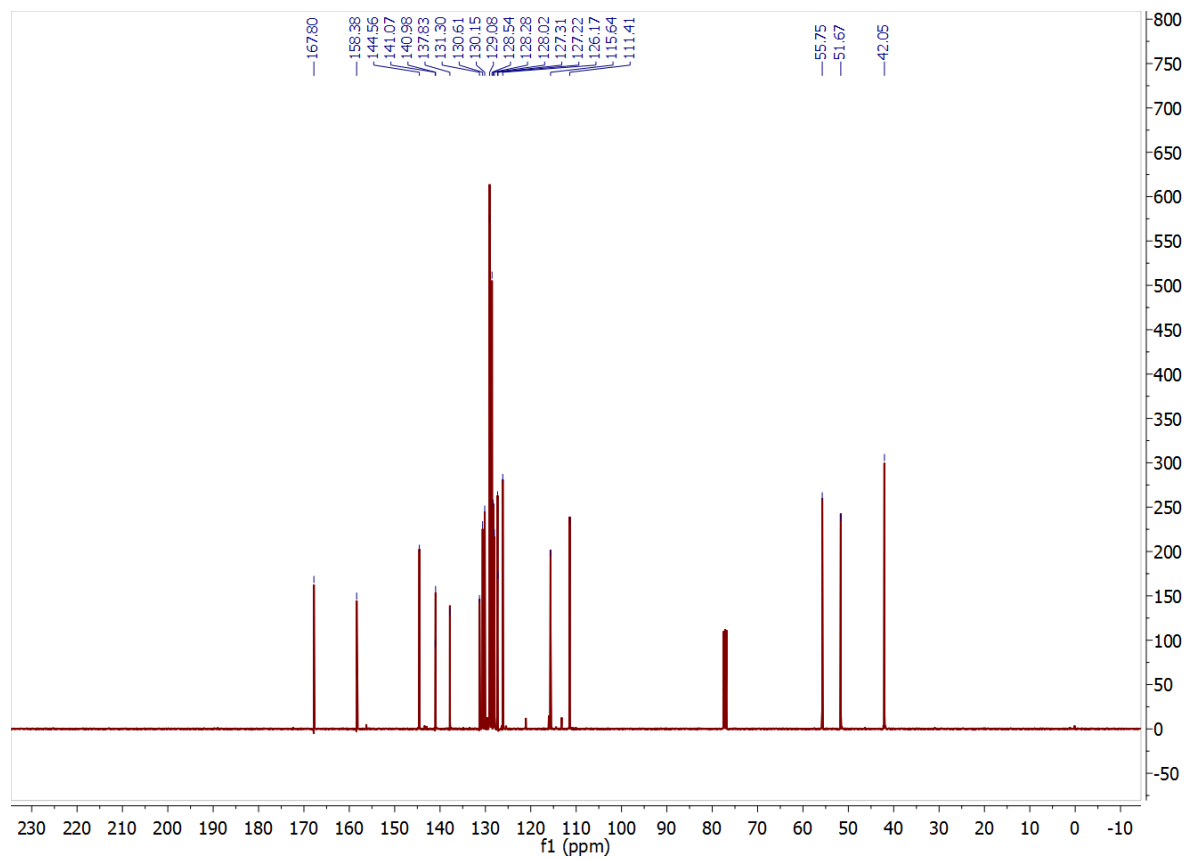

**Figure S7. <sup>1</sup>H NMR spectrum of (*E*)-3-(3'-benzyl-6-hydroxy-[1,1'-biphenyl]-3-yl)acrylic acid (3)**

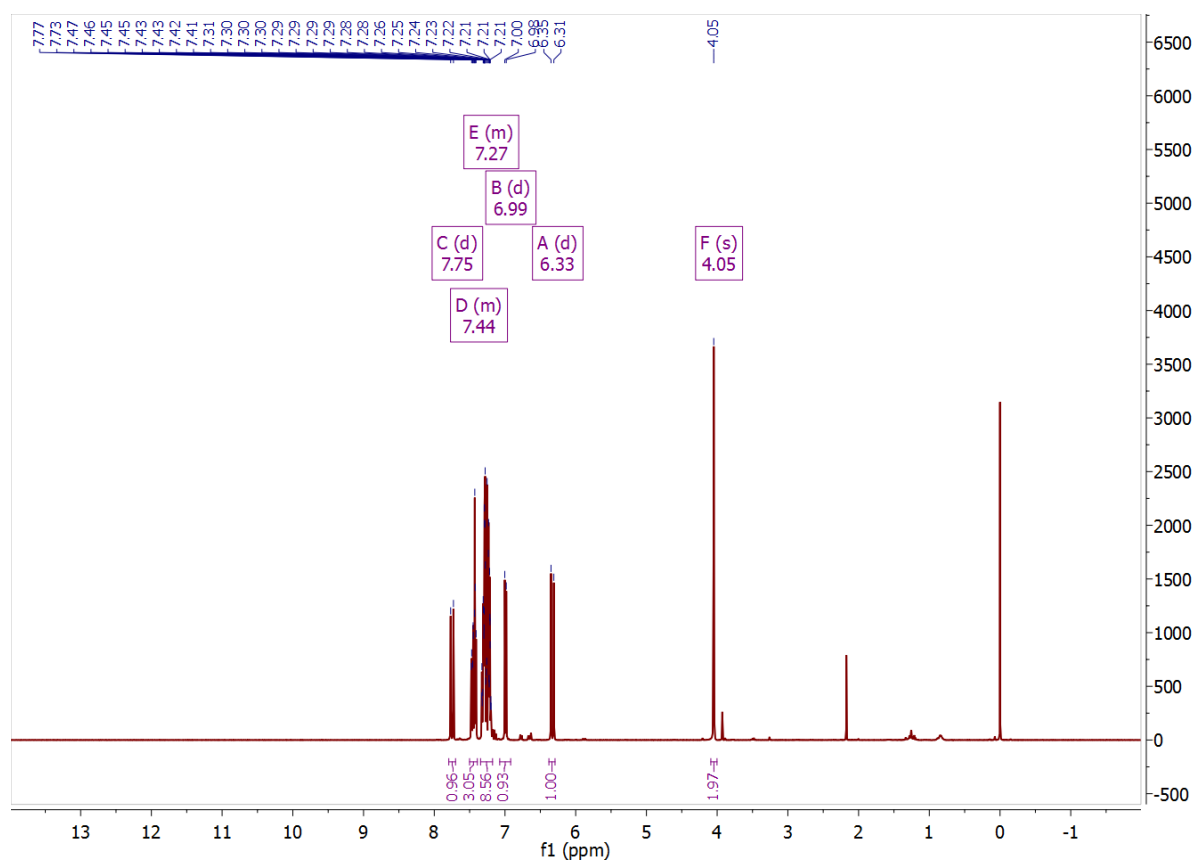

Figure S8. <sup>13</sup>C NMR spectrum of (*E*)-3-(3'-benzyl-6-hydroxy-[1,1'-biphenyl]-3-yl)acrylic acid (3)

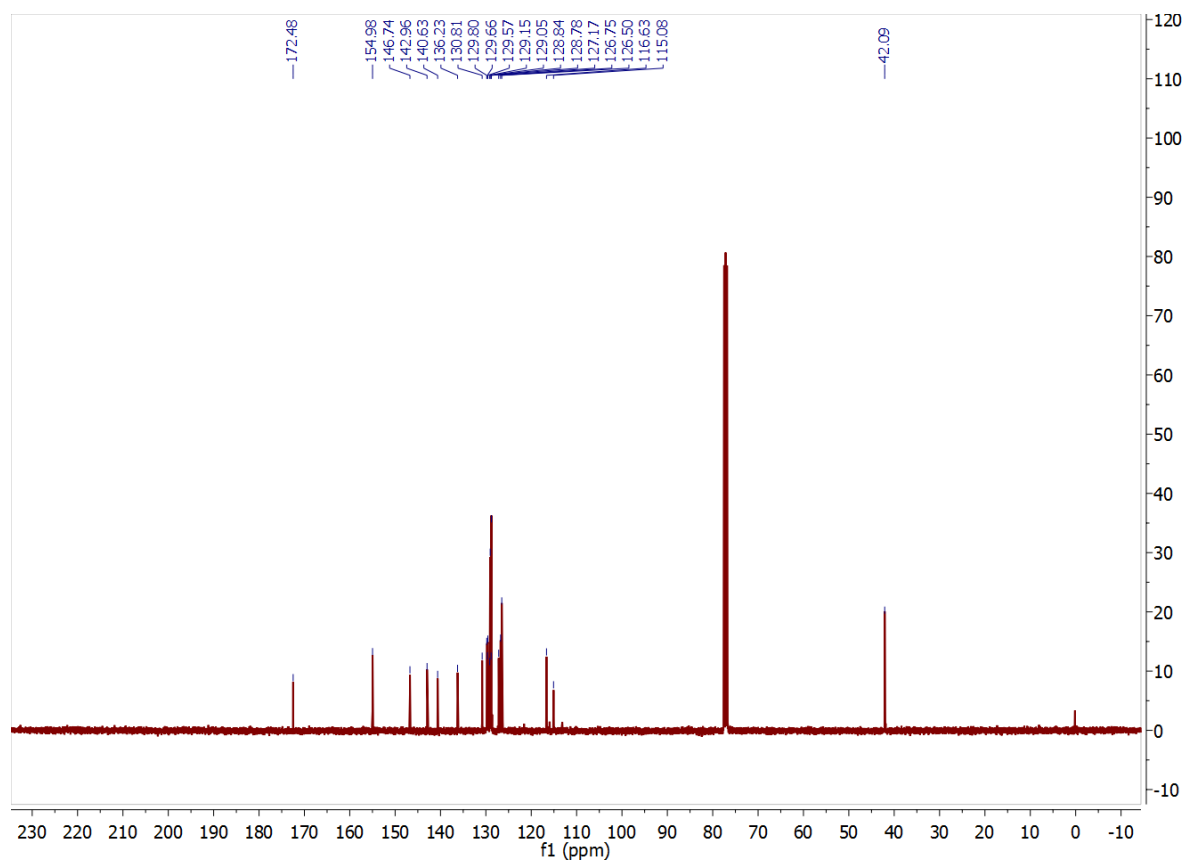

**Figure S9. <sup>1</sup>H NMR spectrum of (*E*)-methyl 3-(3'-isopropyl-6-methoxy-[1,1'-biphenyl]-3-yl)acrylate (15)**

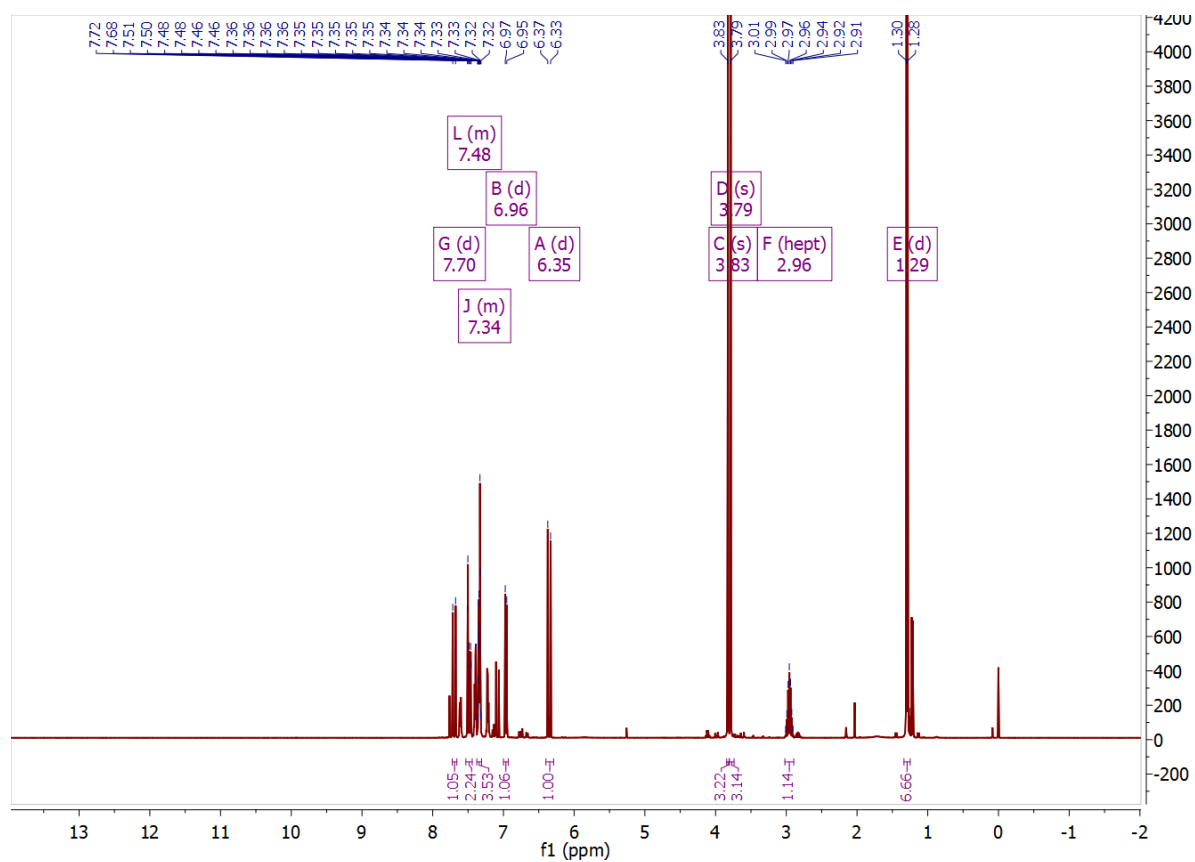

**Figure S10.**  $^{13}\text{C}$  NMR spectrum of (*E*)-methyl 3-(3'-isopropyl-6-methoxy-[1,1'-biphenyl]-3-yl)acrylate (**15**)

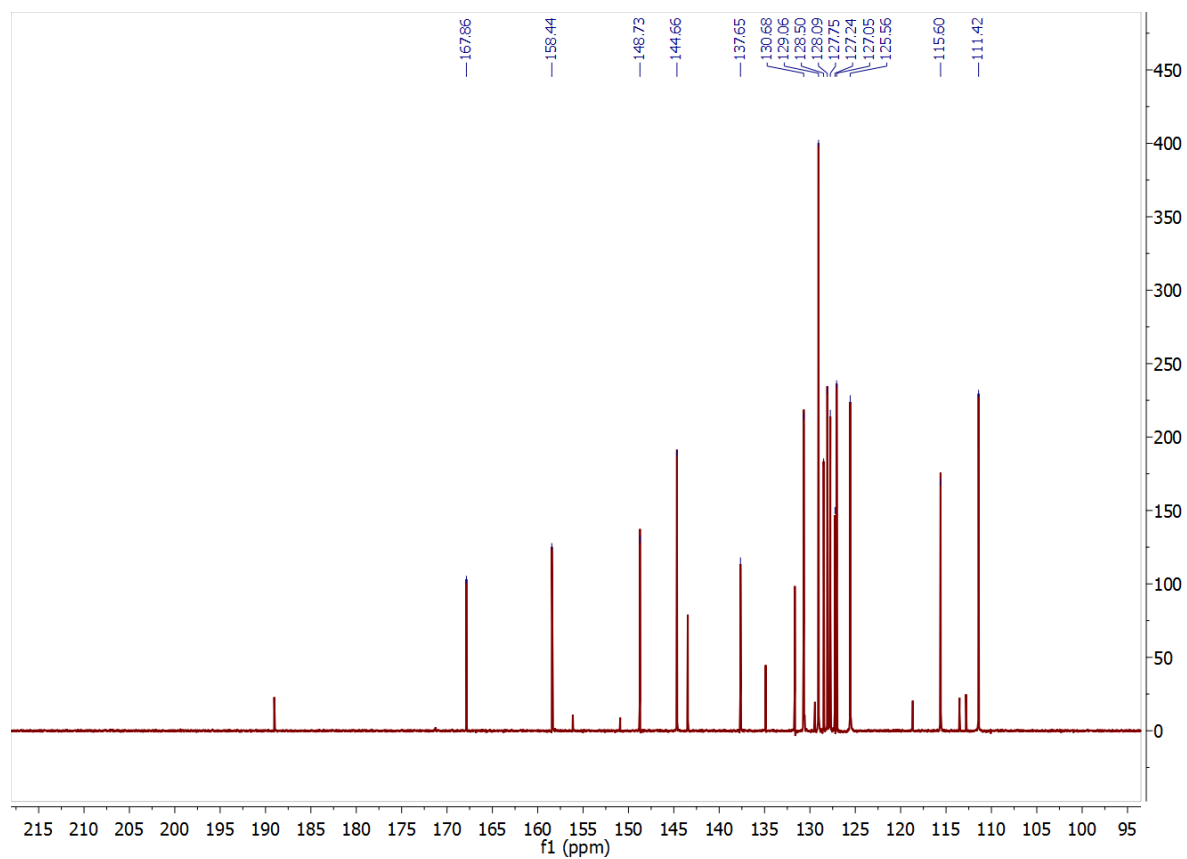

**Figure S11. <sup>1</sup>H NMR spectrum of (*E*)-3-(6-hydroxy-3'-isopropyl-[1,1'-biphenyl]-3-yl)acrylic acid (4)**

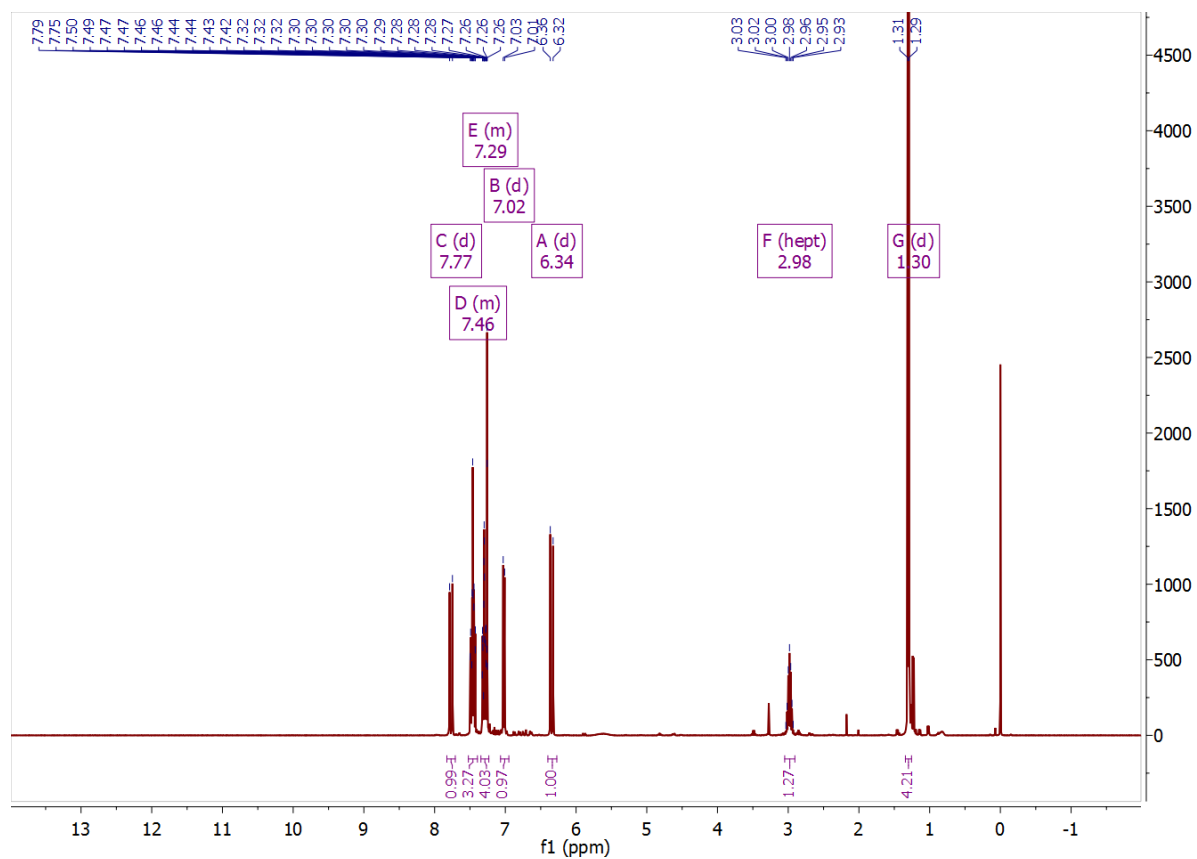



**Figure S12.**  $^{13}\text{C}$  NMR spectrum of (*E*)-3-(6-hydroxy-3'-isopropyl-[1,1'-biphenyl]-3-yl)acrylic acid (**4**)

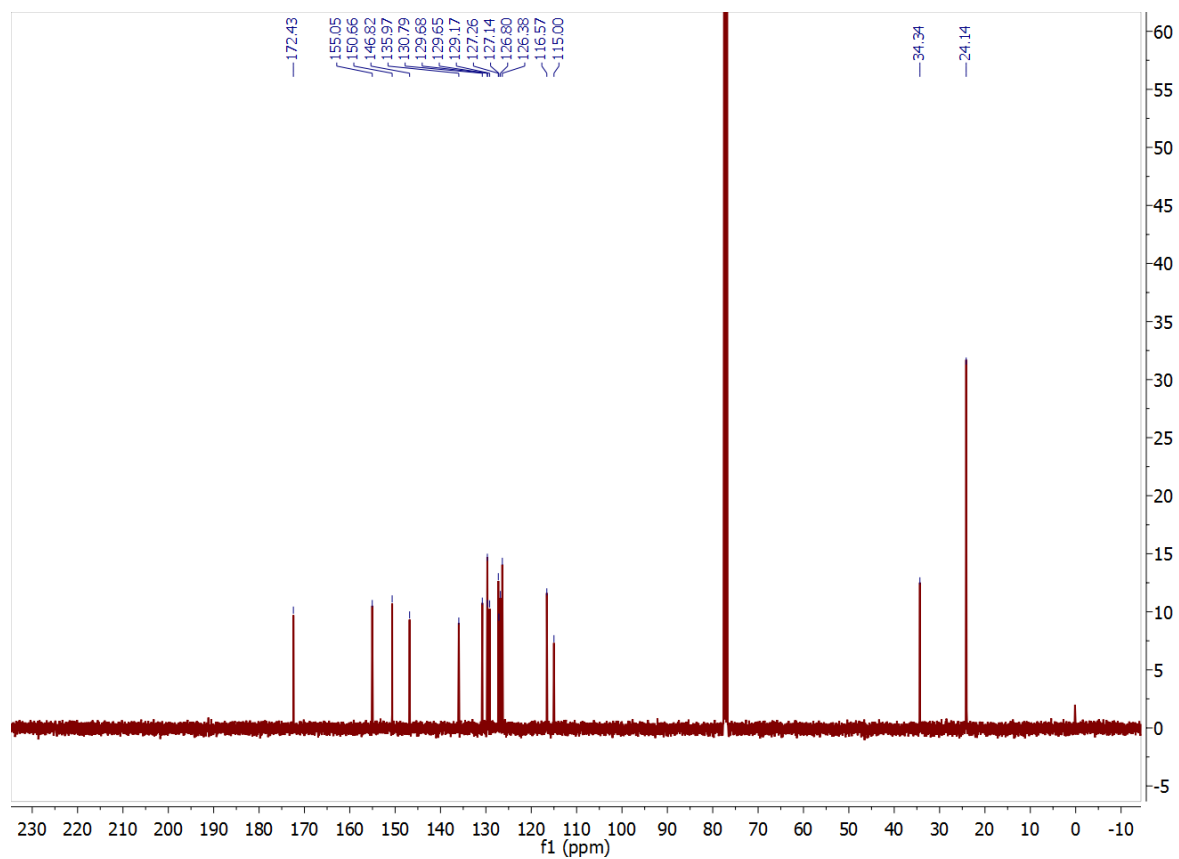

Figure S13. <sup>1</sup>H NMR spectrum of 1-bromo-3-propylbenzene

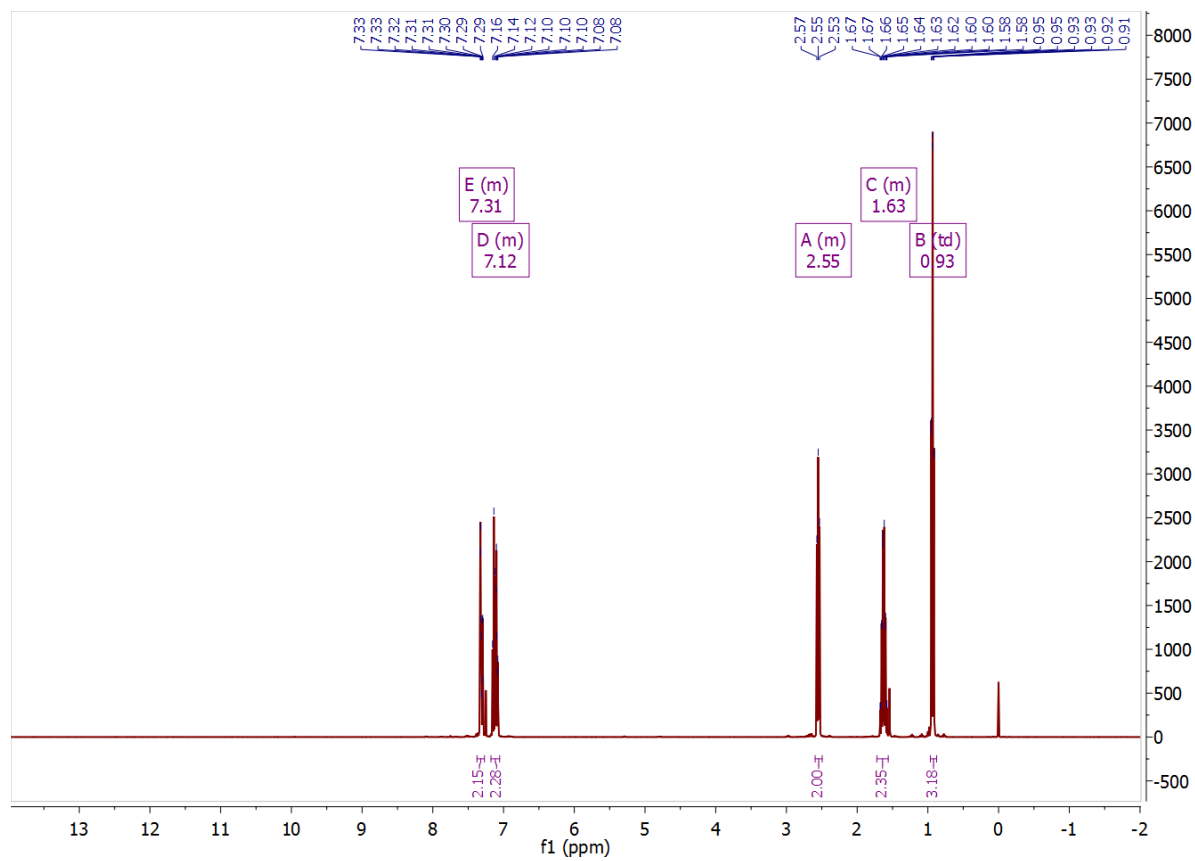

Figure S14. <sup>13</sup>C NMR spectrum of 1-bromo-3-propylbenzene

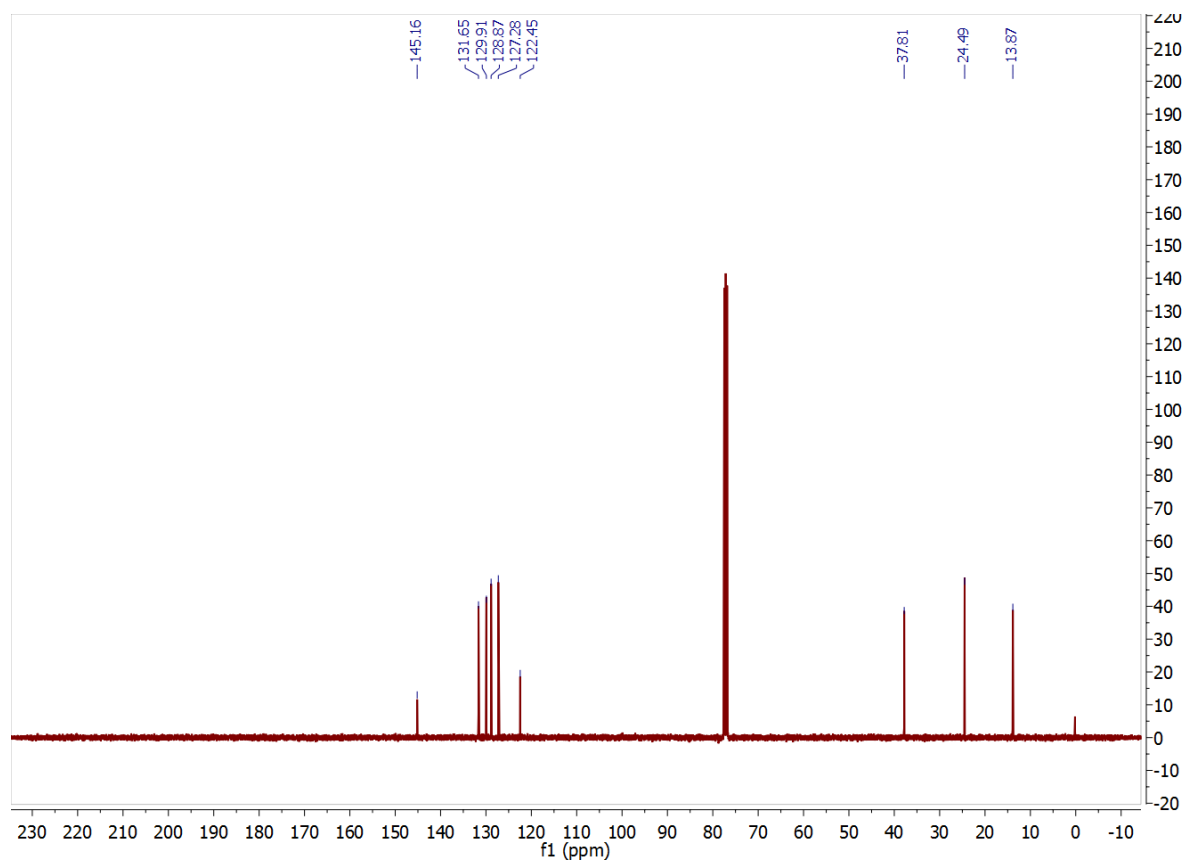

**Figure S15. <sup>1</sup>H NMR spectrum of (*E*)-methyl 3-(6-methoxy-3'-propyl-[1,1'-biphenyl]-3-yl)acrylate (16)**

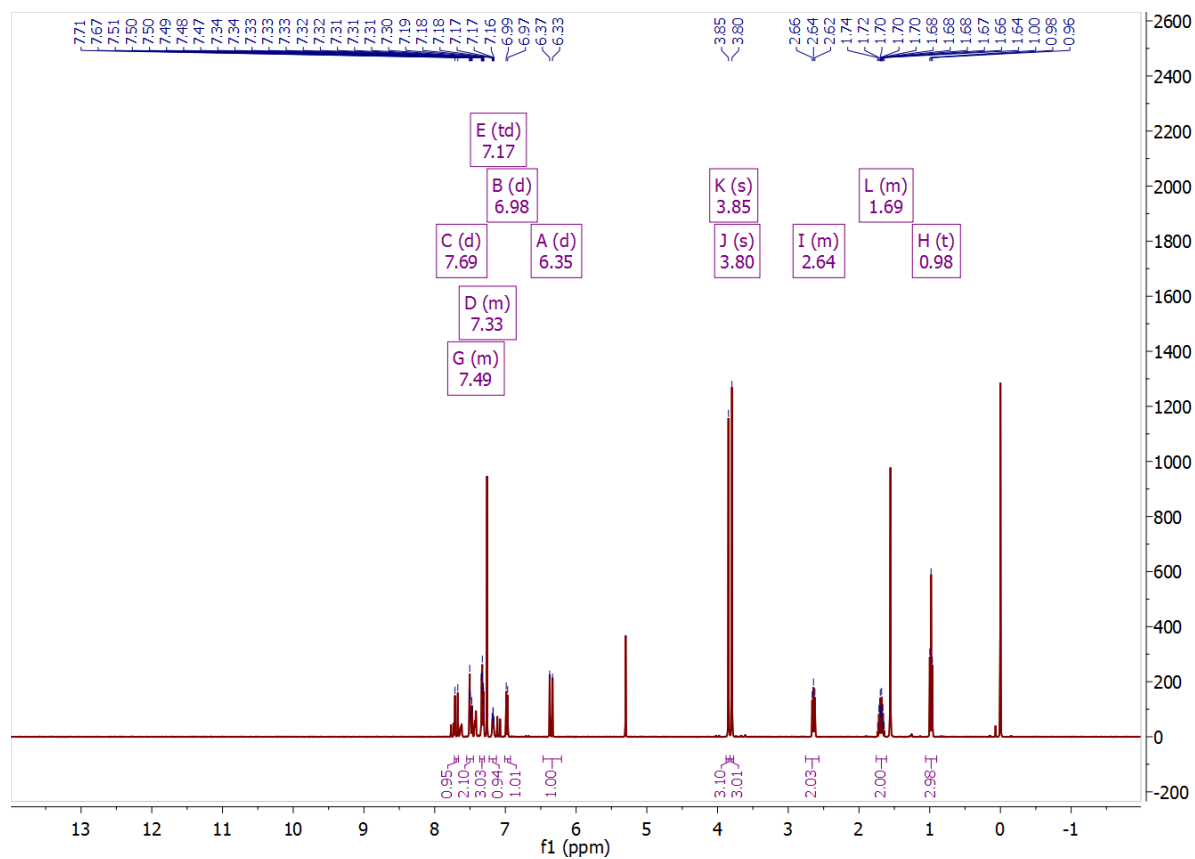

**Figure S16. <sup>13</sup>C NMR spectrum of (*E*)-methyl 3-(6-methoxy-3'-propyl-[1,1'-biphenyl]-3-yl)acrylate (16)**

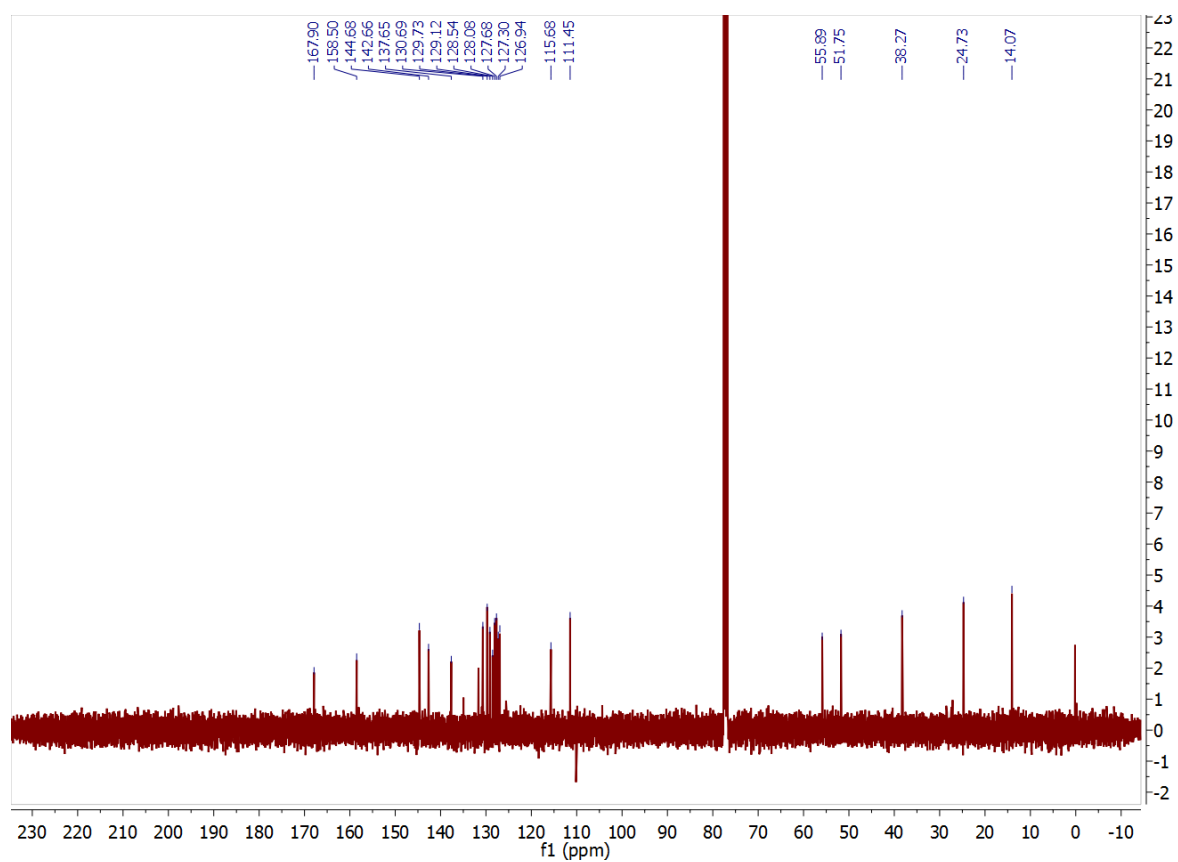

**Figure S17. <sup>1</sup>H NMR spectrum of (*E*)-3-(6-hydroxy-3'-propyl-[1,1'-biphenyl]-3-yl)acrylic acid (5)**

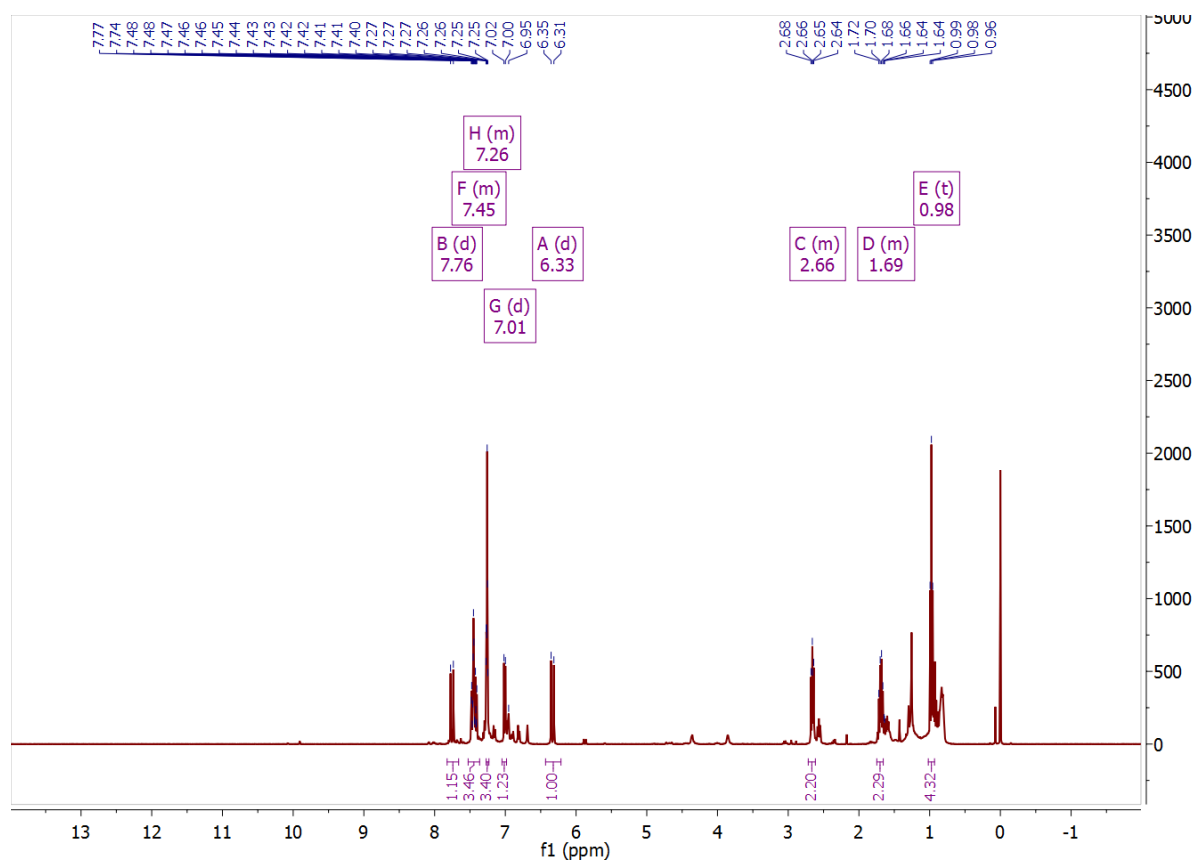

**Figure S18. <sup>13</sup>C NMR spectrum of (*E*)-3-(6-hydroxy-3'-propyl-[1,1'-biphenyl]-3-yl)acrylic acid (5)**

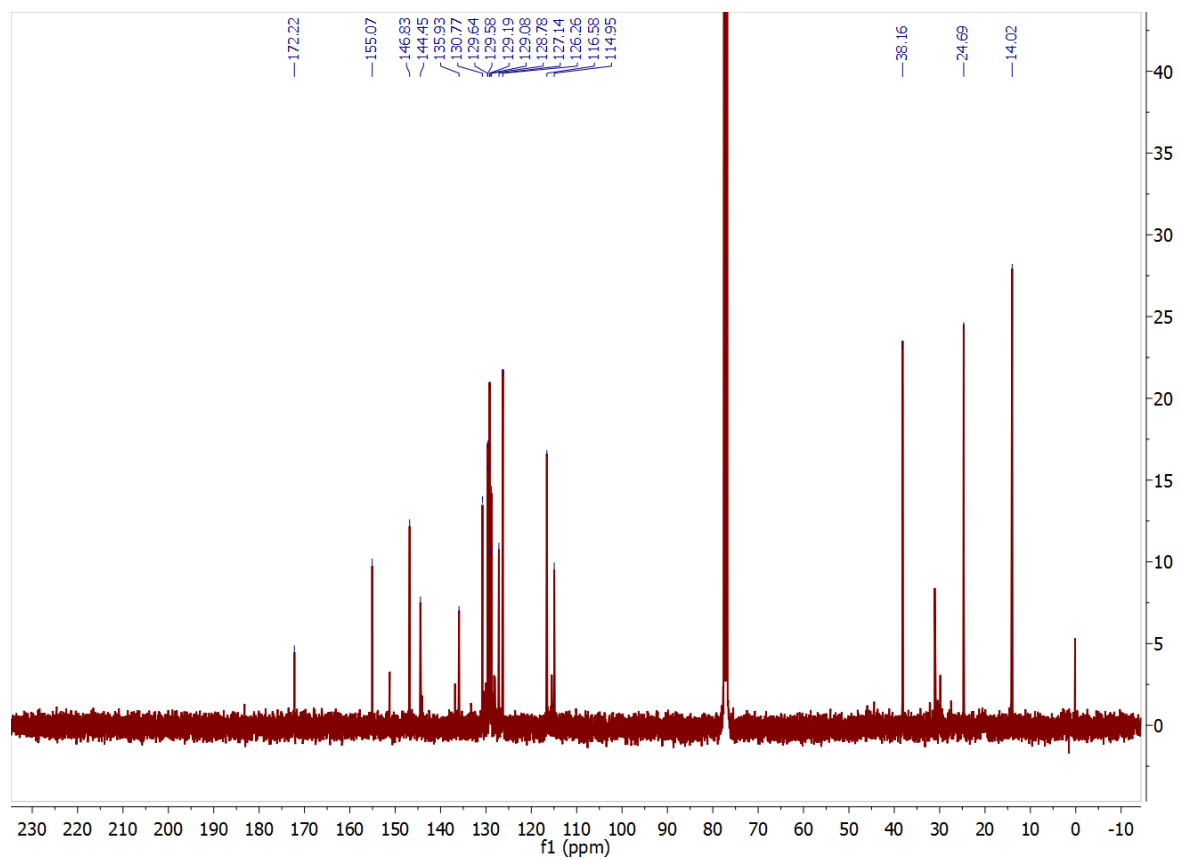

Figure S19. <sup>1</sup>H NMR spectrum of 3-chloro-2-methyl-1,1'-biphenyl (19)

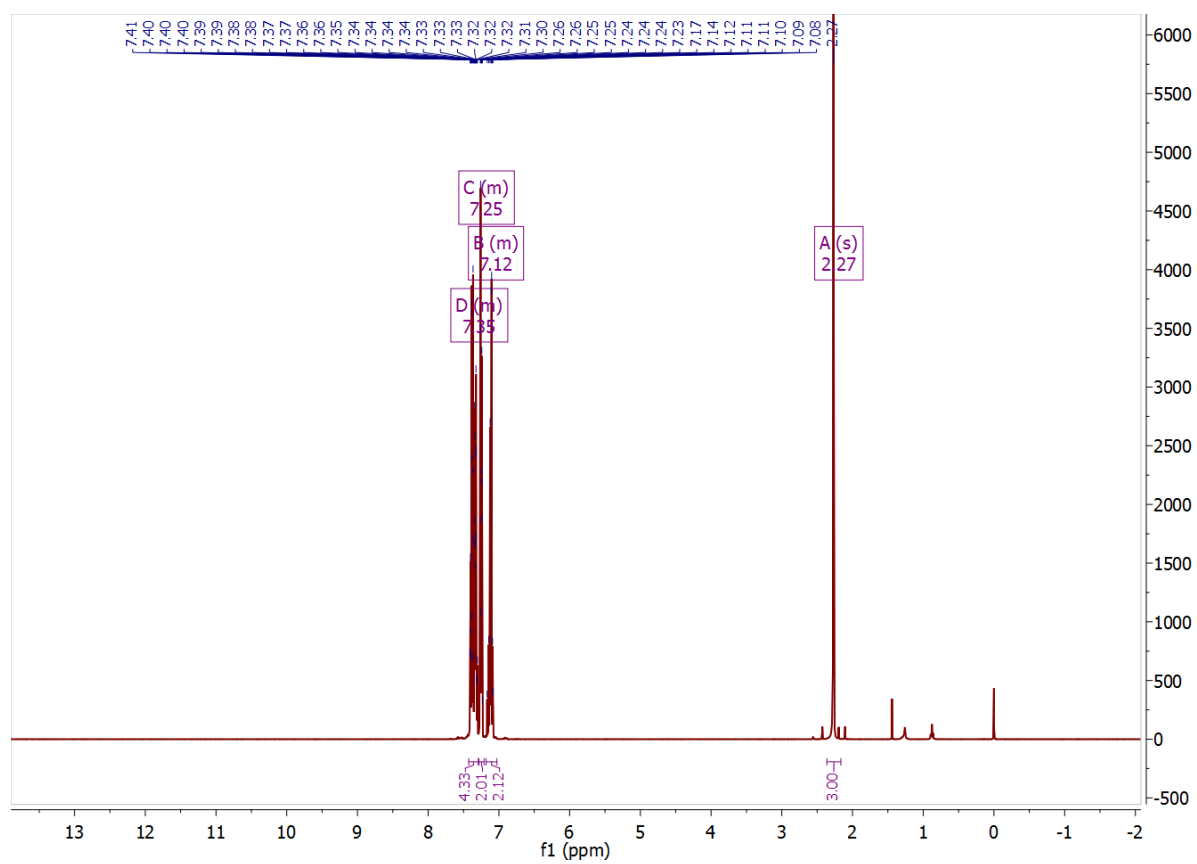



Figure S20. <sup>13</sup>C NMR spectrum of 3-chloro-2-methyl-1,1'-biphenyl (19)

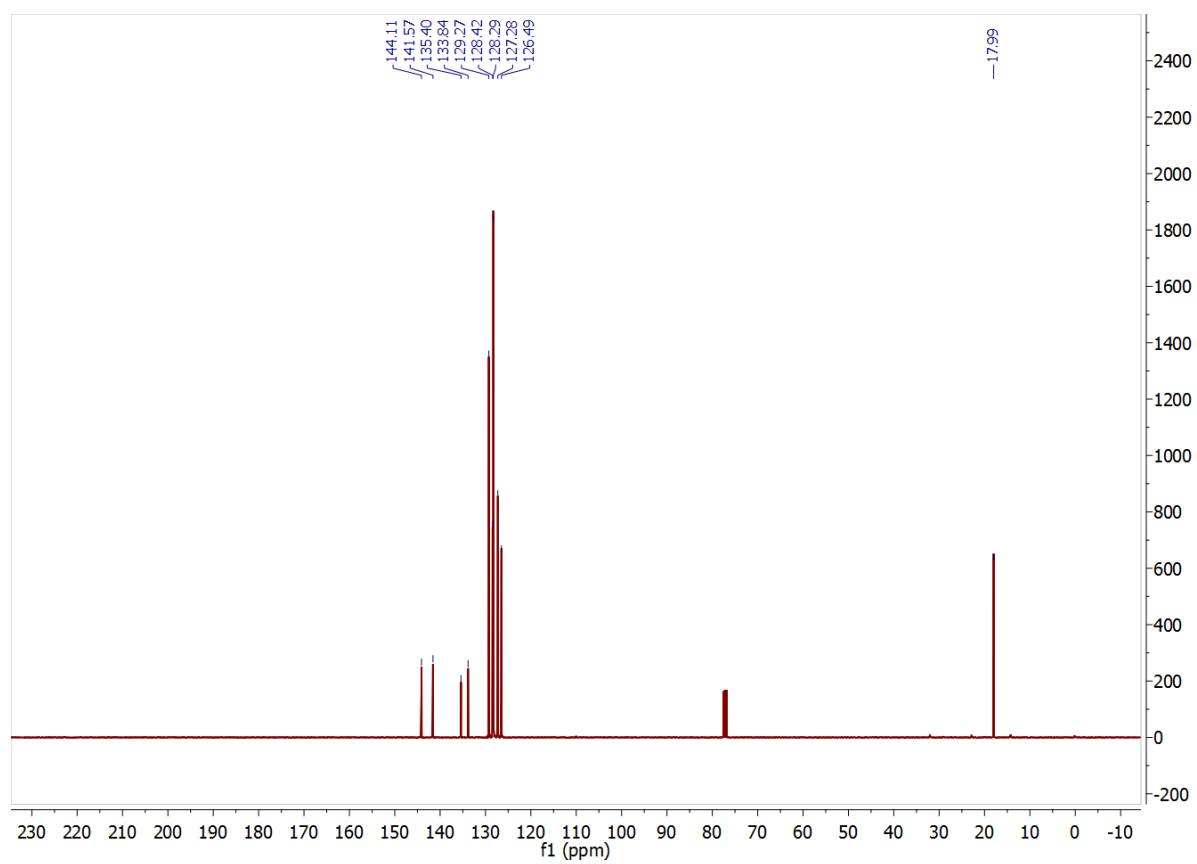

**Figure S21. <sup>1</sup>H NMR spectrum of (*E*)-methyl 3-(6-(methoxymethoxy)-2'-methyl-[1,1':3',1''-terphenyl]-3-yl)acrylate (21)**

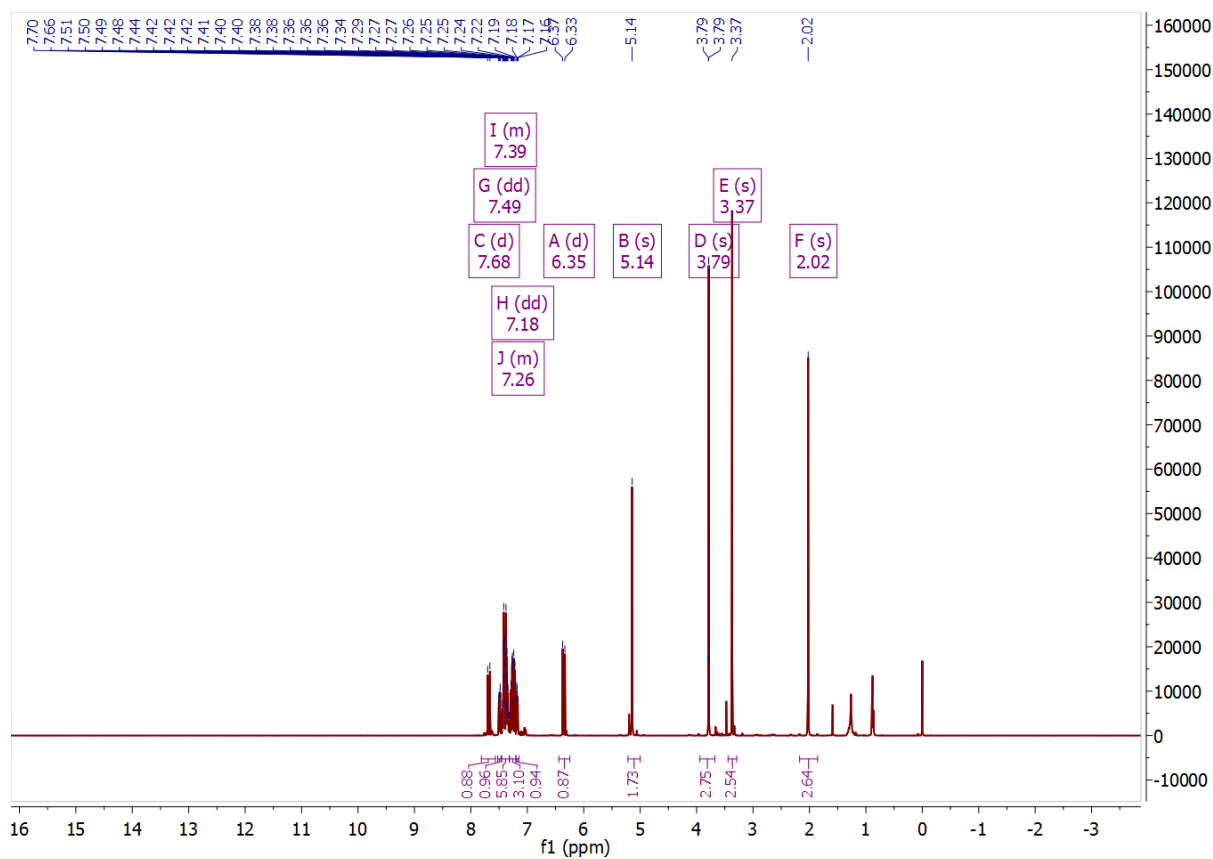

**Figure S22. <sup>13</sup>C NMR spectrum of (*E*)-methyl 3-(6-(methoxymethoxy)-2'-methyl-[1,1':3',1''-terphenyl]-3-yl)acrylate (21)**

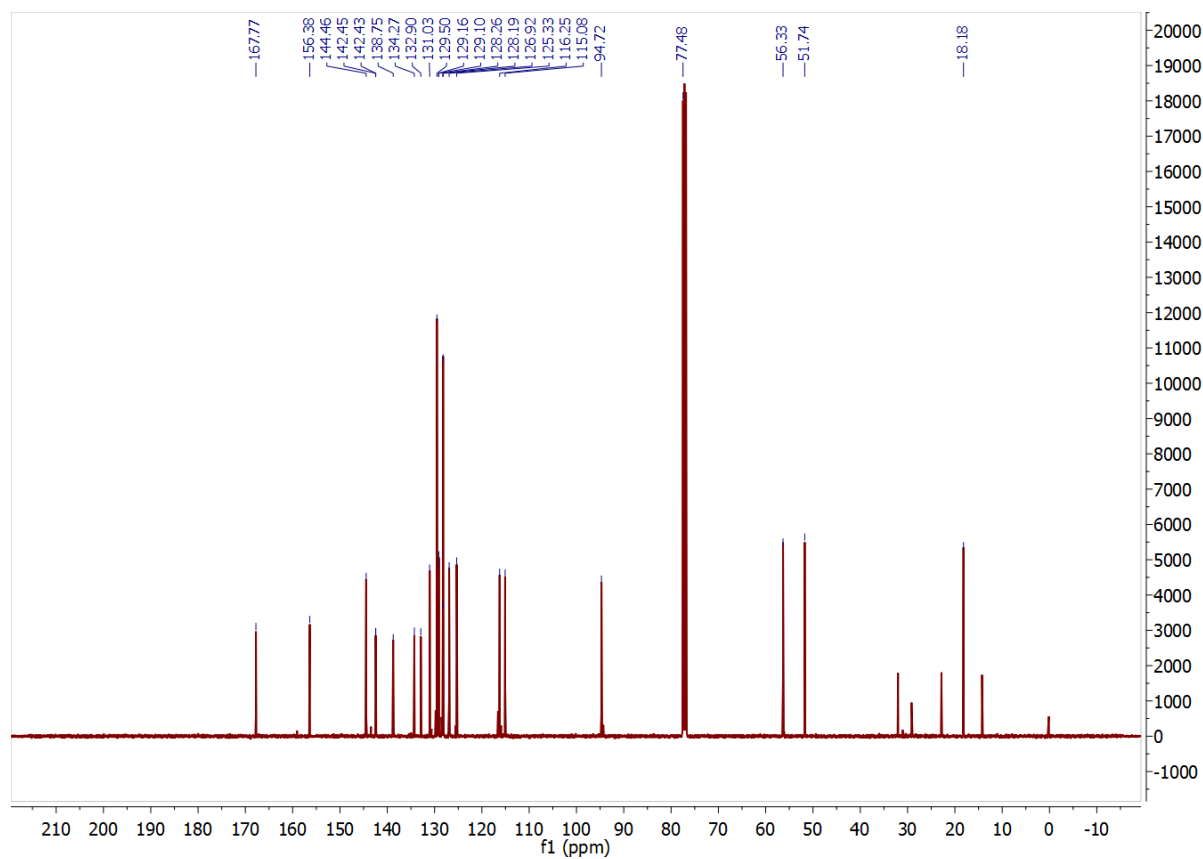

**Figure S23. <sup>1</sup>H NMR spectrum of (*E*)-3-(6-hydroxy-2'-methyl-[1,1':3',1''-terphenyl]-3-yl)acrylic acid (6)**

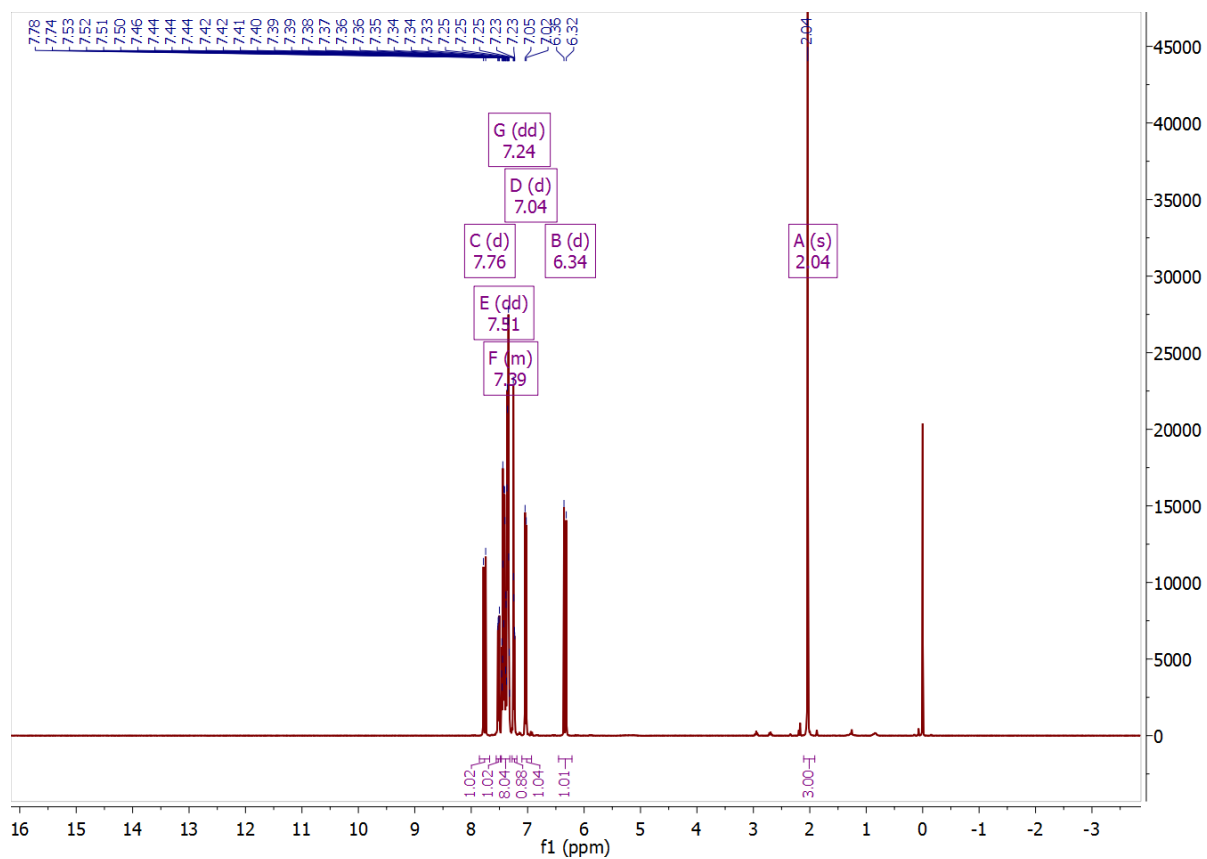

**Figure S24. <sup>13</sup>C NMR spectrum of (*E*)-3-(6-hydroxy-2'-methyl-[1,1':3',1''-terphenyl]-3-yl)acrylic acid (6)**

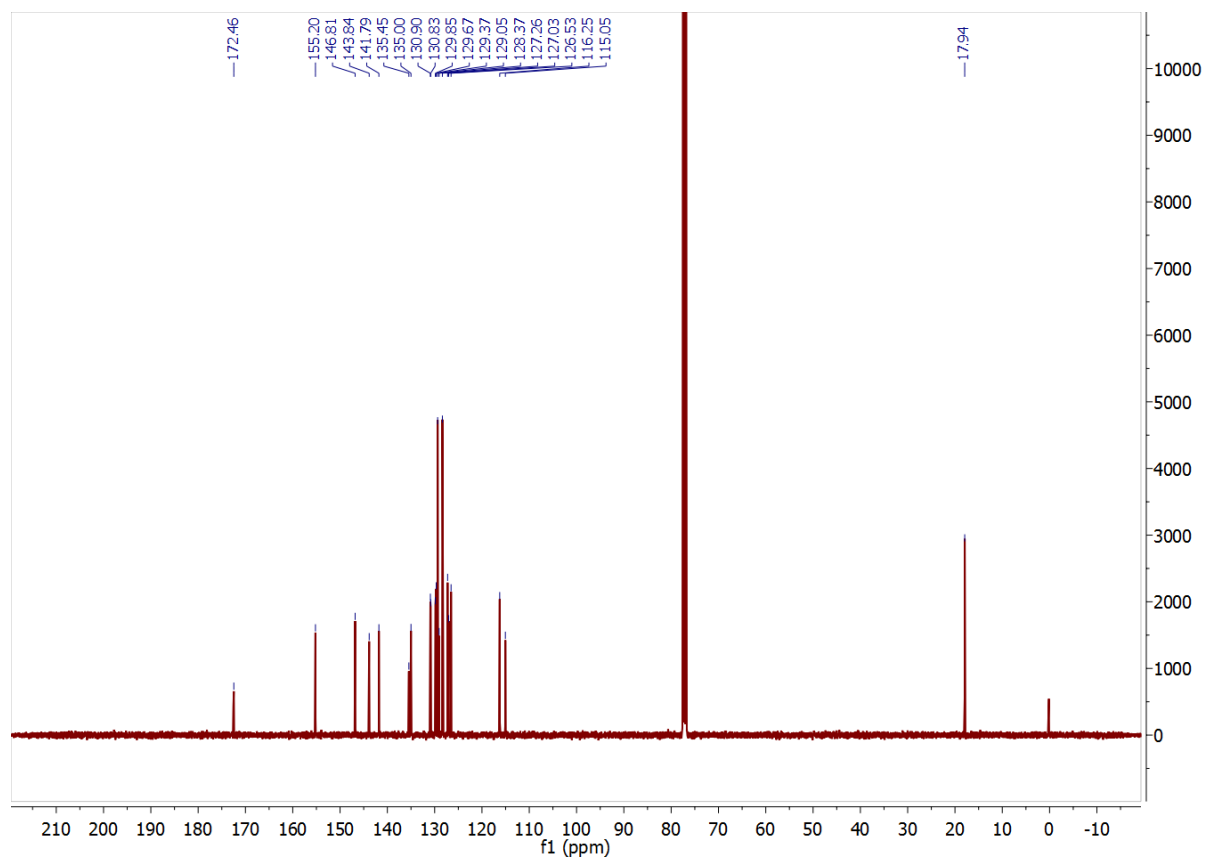

Figure S25. <sup>1</sup>H NMR spectrum of 3-chloro-4-methyl-1,1'-biphenyl (20)

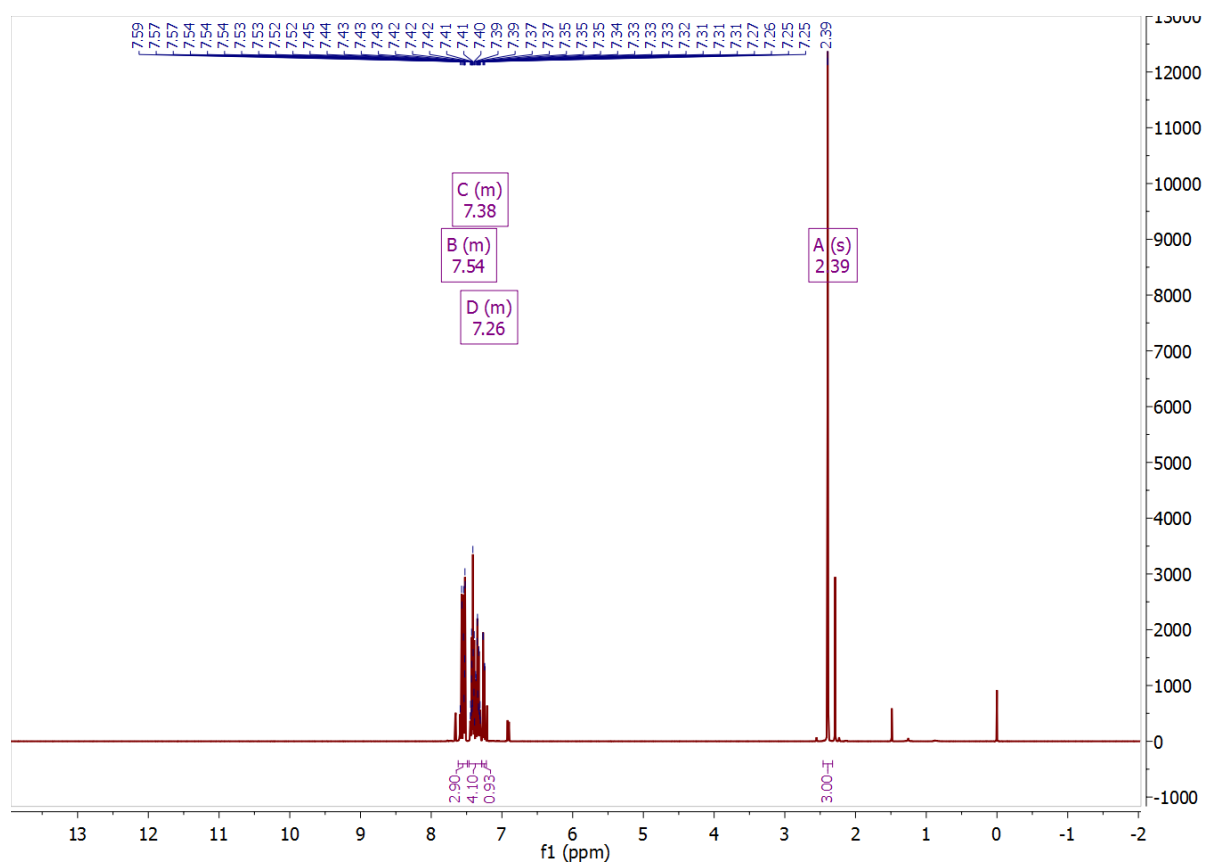

Figure S26. <sup>13</sup>C NMR spectrum of 3-chloro-4-methyl-1,1'-biphenyl (20)

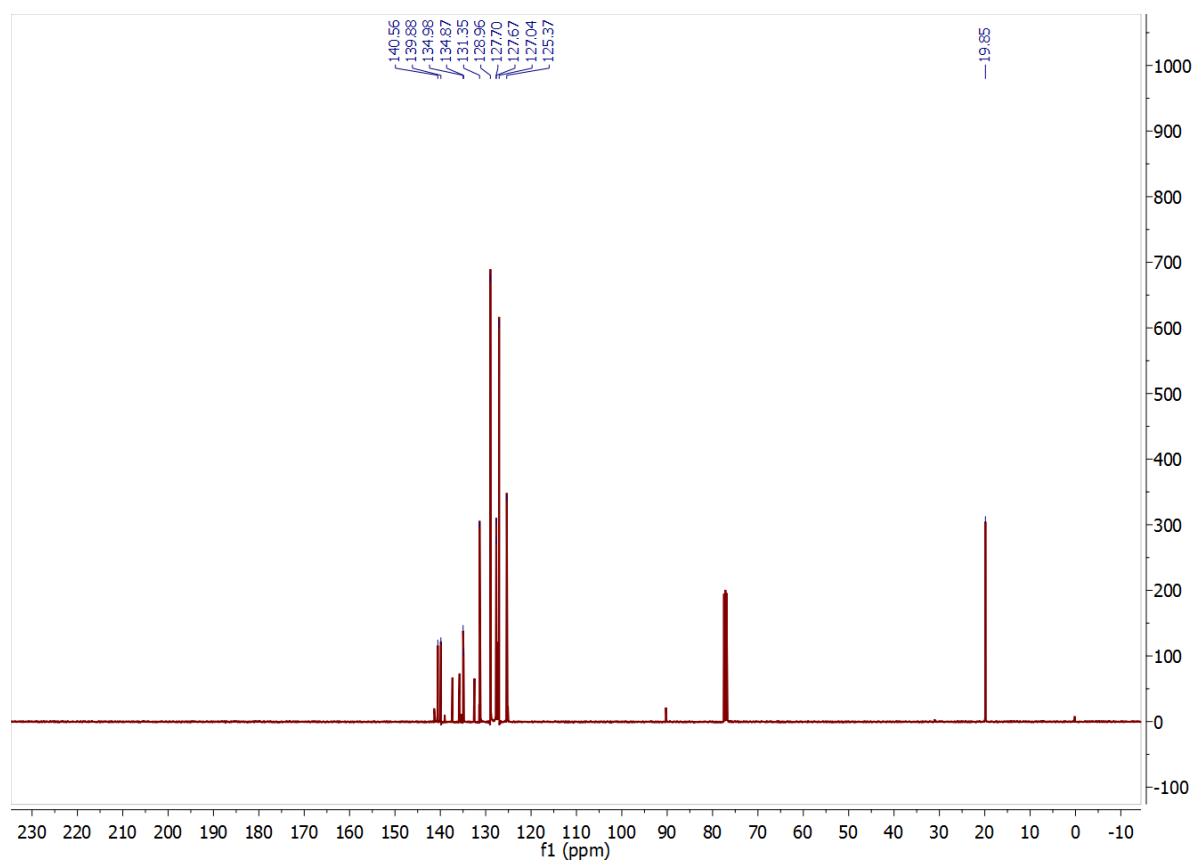

**Figure S27. <sup>1</sup>H NMR spectrum of (*E*)-methyl 3-(6-(methoxymethoxy)-6'-methyl-[1,1':3',1''-terphenyl]-3-yl)acrylate (22)**

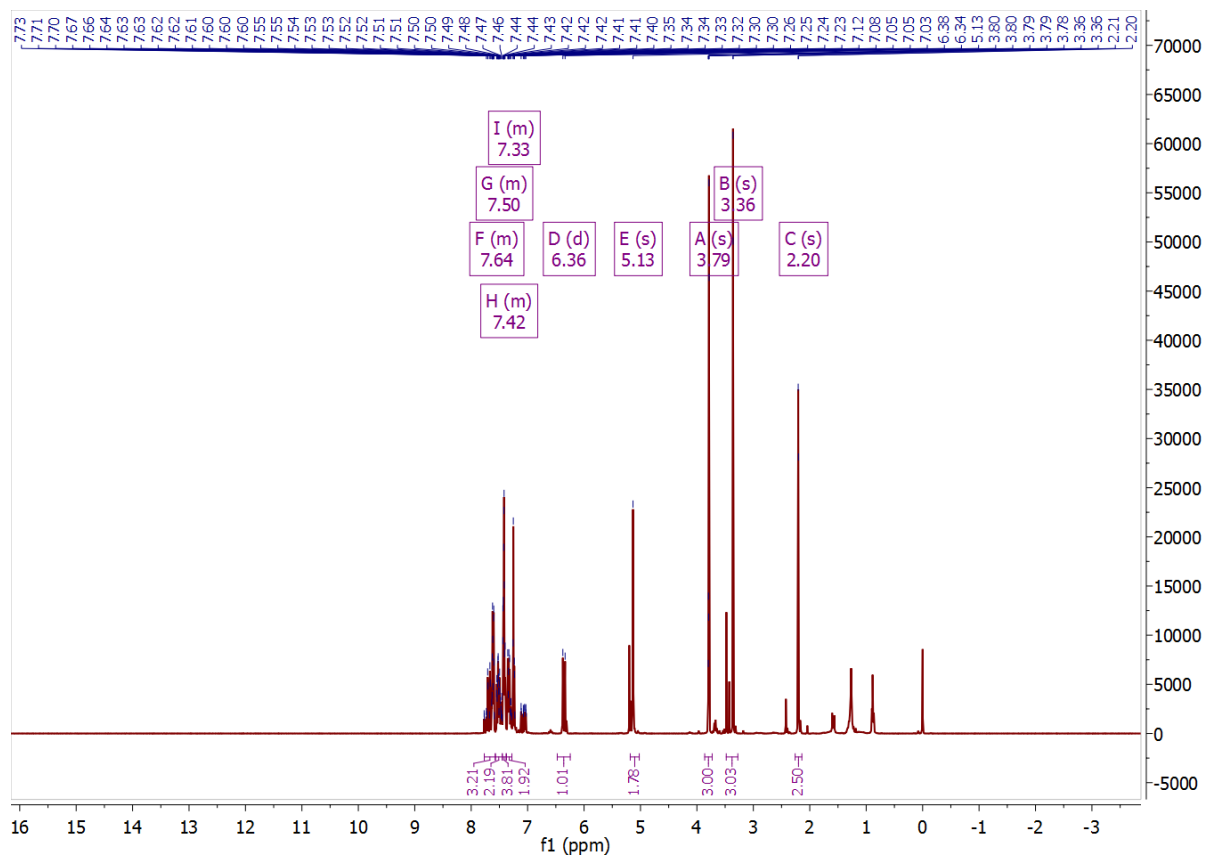



**Figure S28.  $^{13}\text{C}$  NMR spectrum of (*E*)-methyl 3-(6-(methoxymethoxy)-6'-methyl-[1,1':3',1''-terphenyl]-3-yl)acrylate (22)**

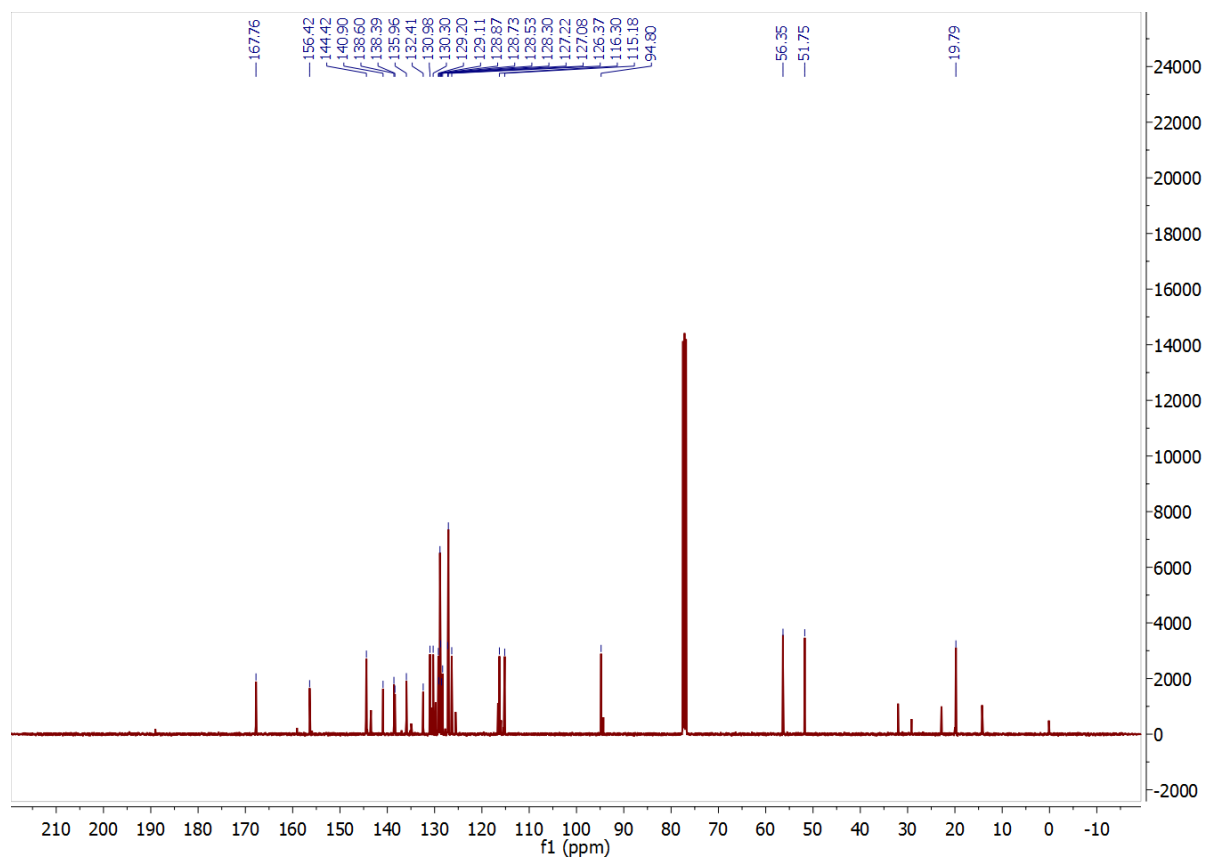

**Figure S29.**  $^1\text{H}$  NMR spectrum of (*E*)-3-(6-hydroxy-6'-methyl-[1,1':3',1''-terphenyl]-3-yl)acrylic acid (**7**)

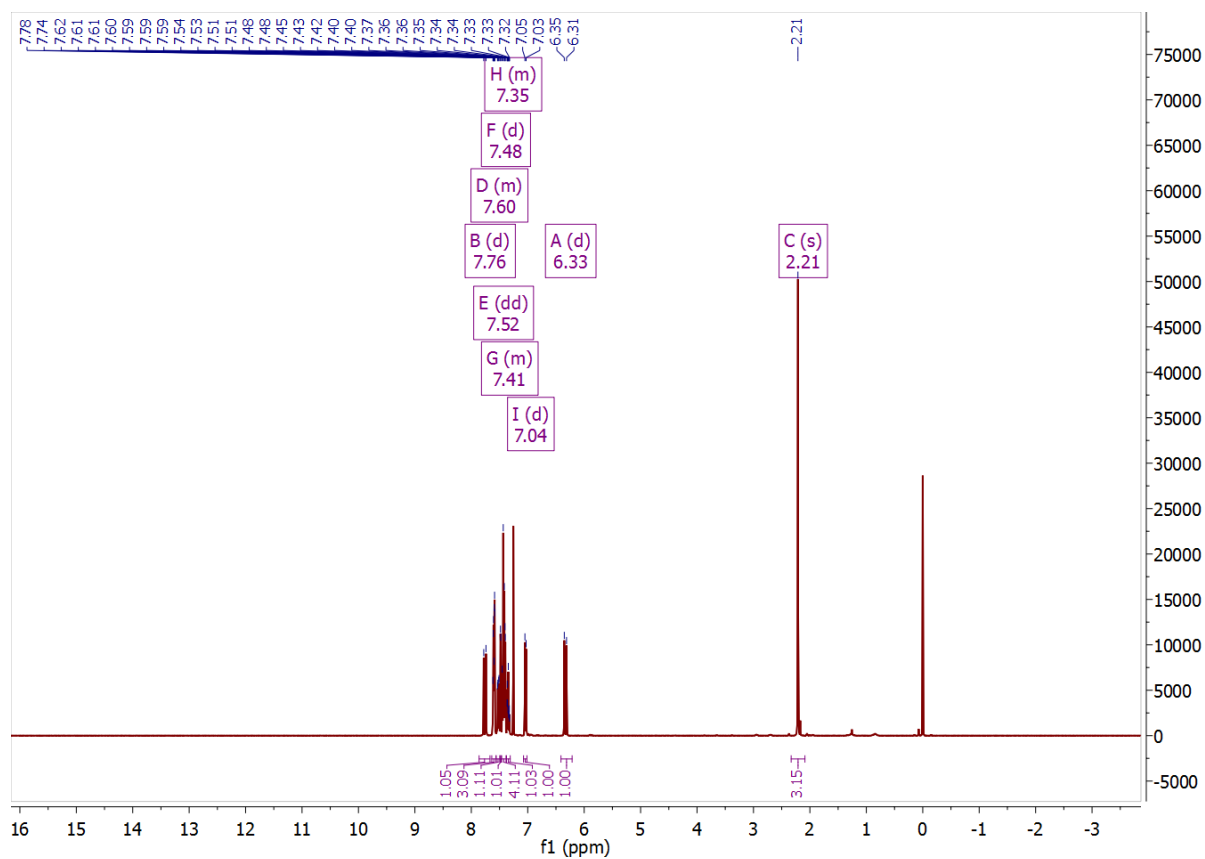

**Figure S30. <sup>13</sup>C NMR spectrum of (*E*)-3-(6-hydroxy-6'-methyl-[1,1':3',1''-terphenyl]-3-yl)acrylic acid (7)**

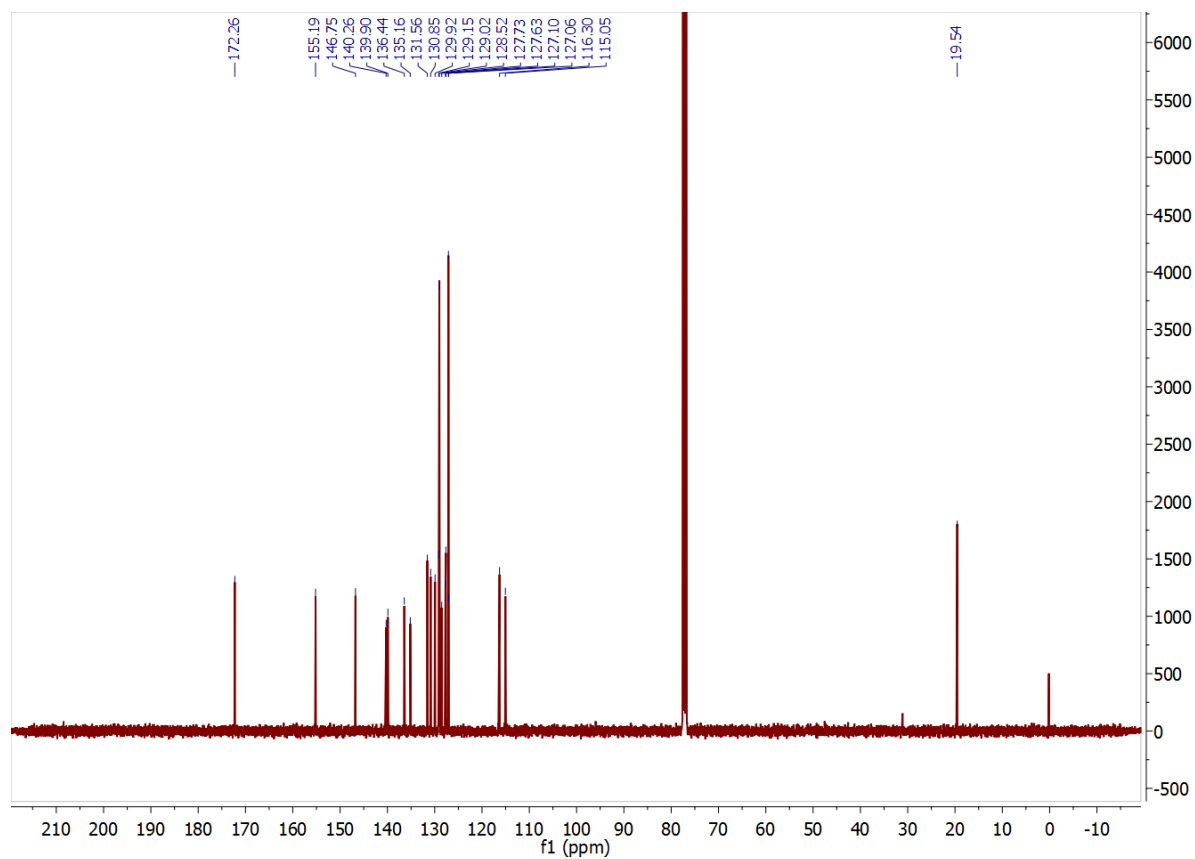

**Figure S31. <sup>1</sup>H NMR spectrum of (*E*)-methyl 3-(5'-allyl-6-(methoxymethoxy)-2'-propoxy-[1,1'-biphenyl]-3-yl)acrylate (25)**

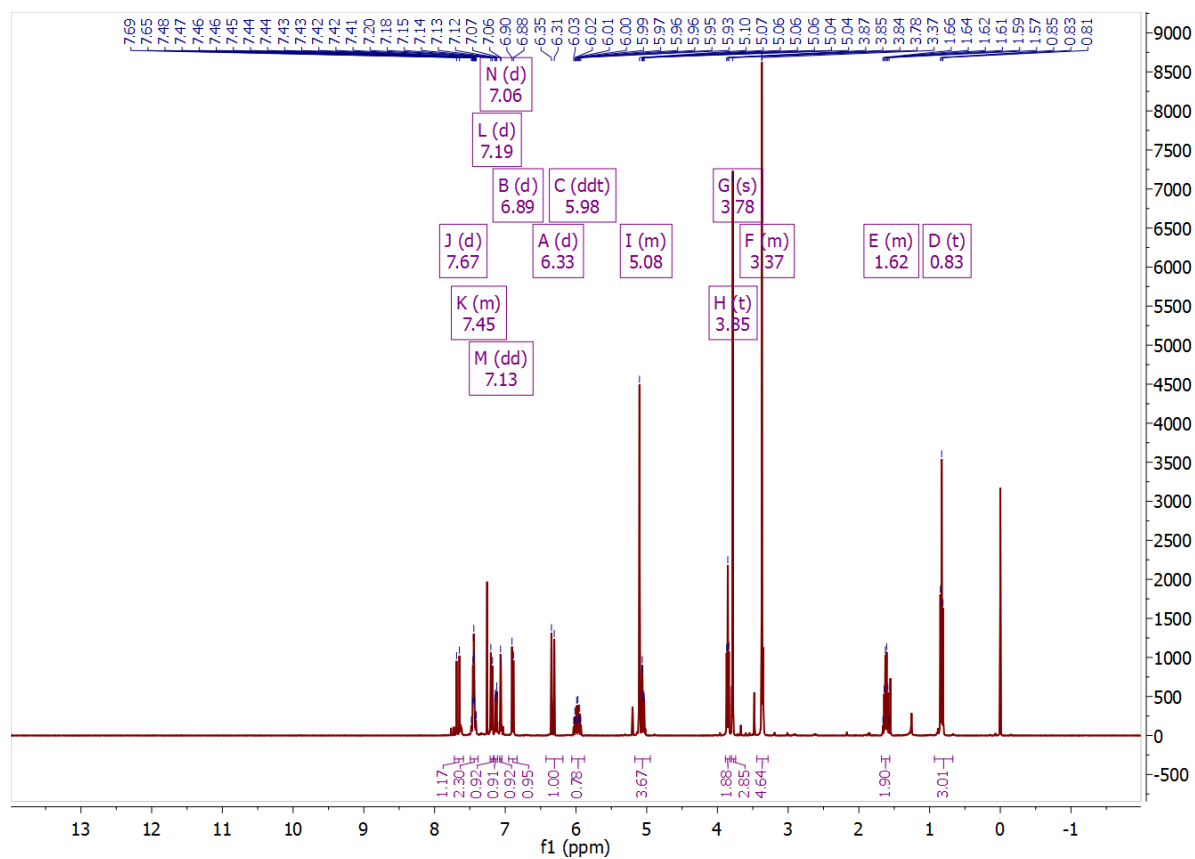

**Figure S32. <sup>13</sup>C NMR spectrum of (*E*)-methyl 3-(5'-allyl-6-(methoxymethoxy)-2'-propoxy-[1,1'-biphenyl]-3-yl)acrylate (25)**

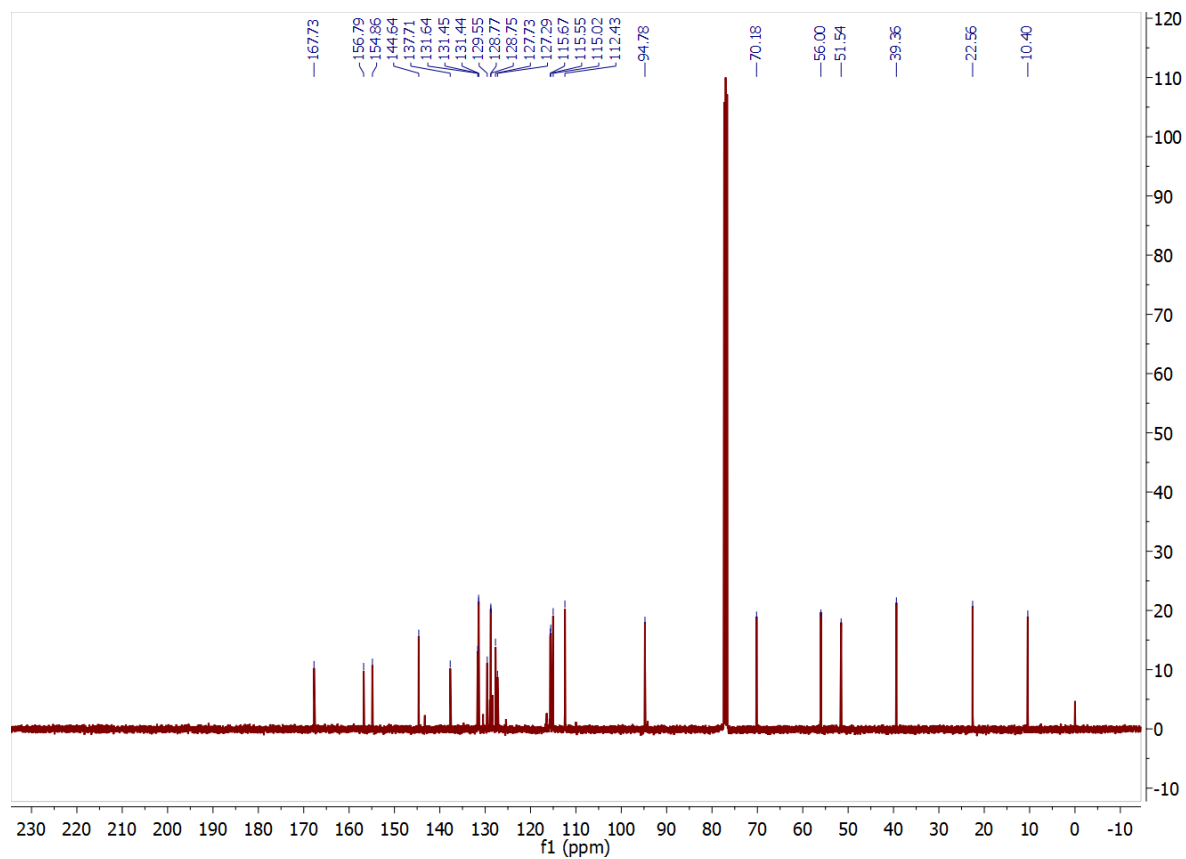

**Figure S33. <sup>1</sup>H NMR spectrum of (*E*)-3-(5'-allyl-6-hydroxy-2'-propoxy-[1,1'-biphenyl]-3-yl)acrylic acid (9)**

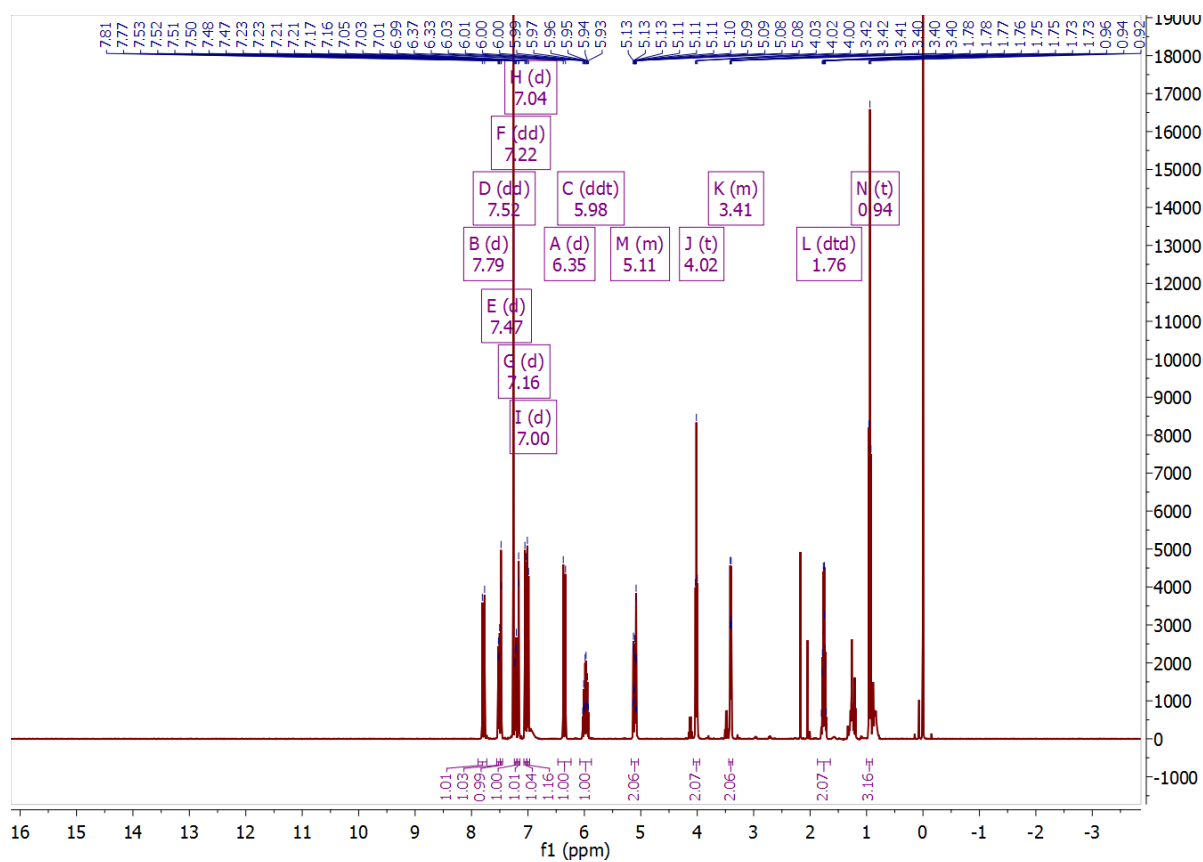

**Figure S34. <sup>13</sup>C NMR spectrum of (*E*)-3-(5'-allyl-6-hydroxy-2'-propoxy-[1,1'-biphenyl]-3-yl)acrylic acid (9)**

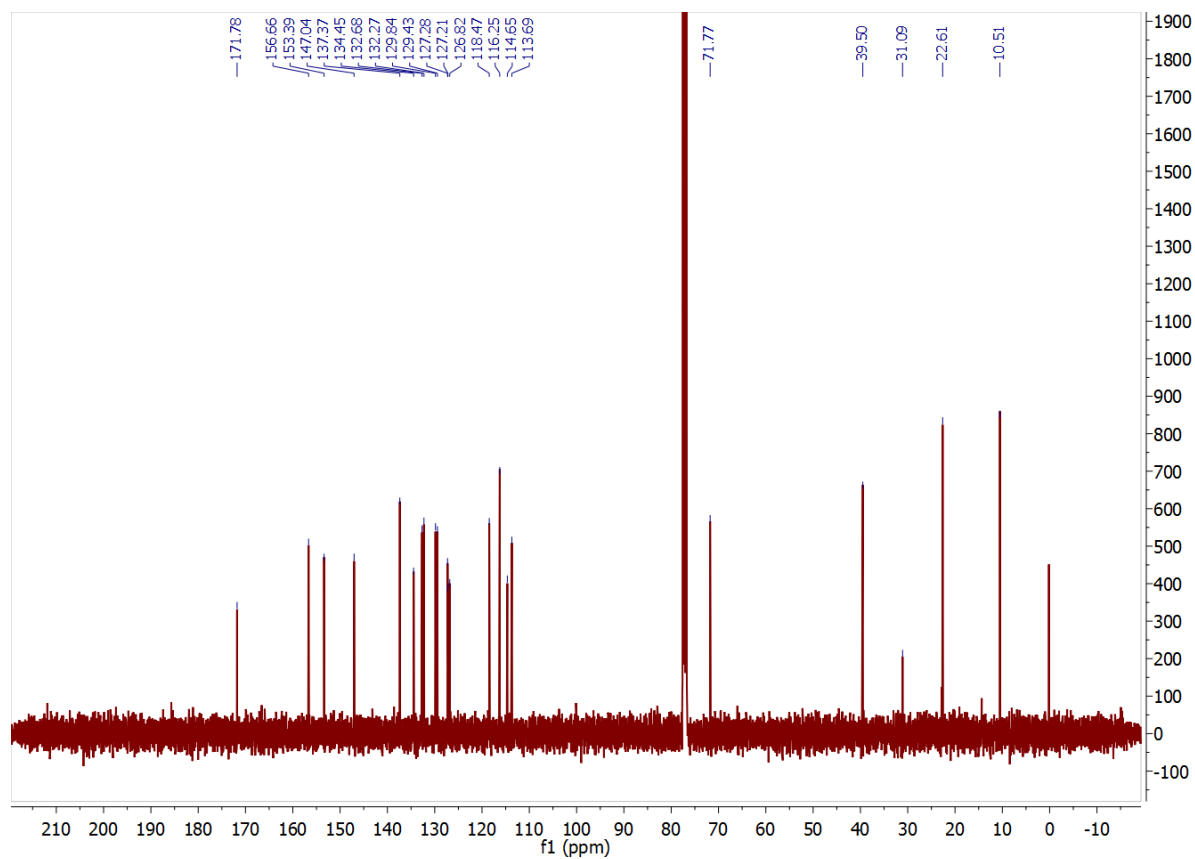

**Figure S35. <sup>1</sup>H NMR spectrum of (*E*)-methyl 3-(5'-allyl-2'-(hexyloxy)-6-(methoxymethoxy)-[1,1'-biphenyl]-3-yl)acrylate (26)**

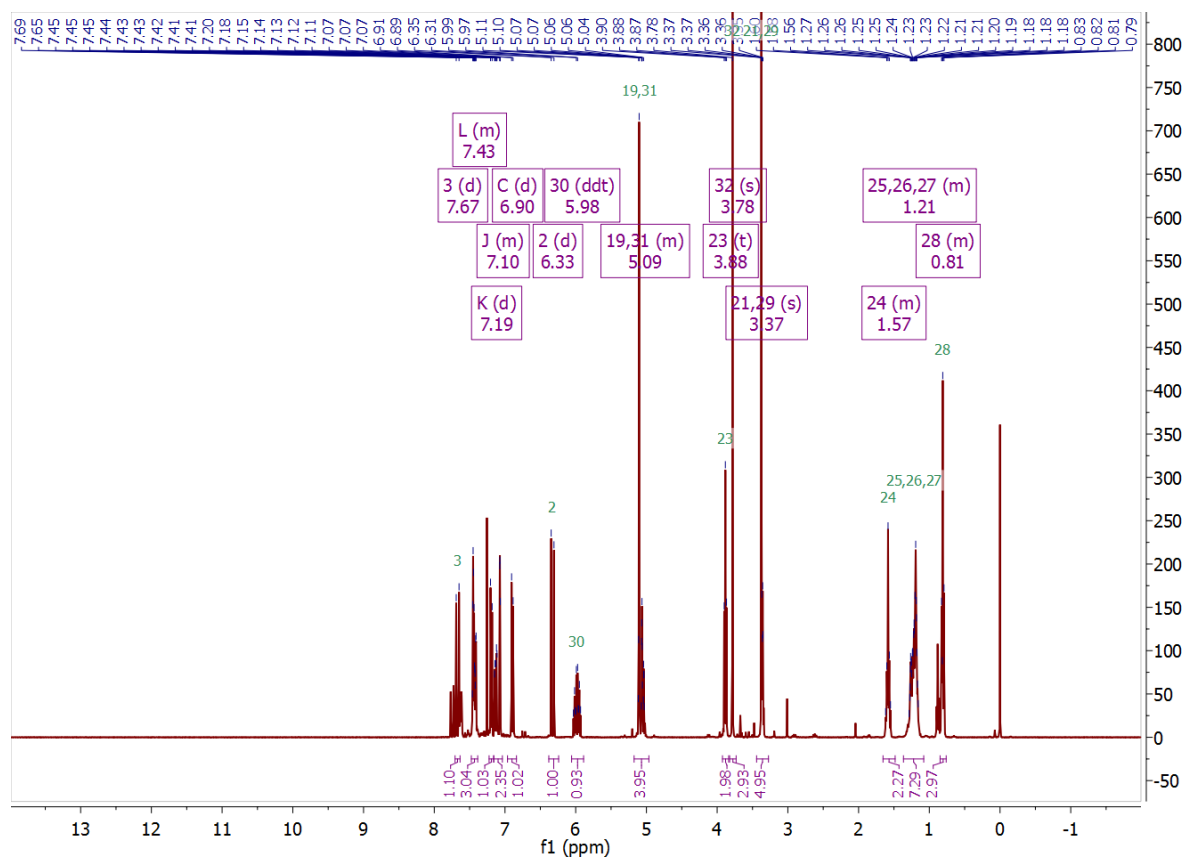



**Figure S36.  $^{13}\text{C}$  NMR spectrum of (*E*)-methyl 3-(5'-allyl-2'-(hexyloxy)-6-(methoxymethoxy)-[1,1'-biphenyl]-3-yl)acrylate (26)**

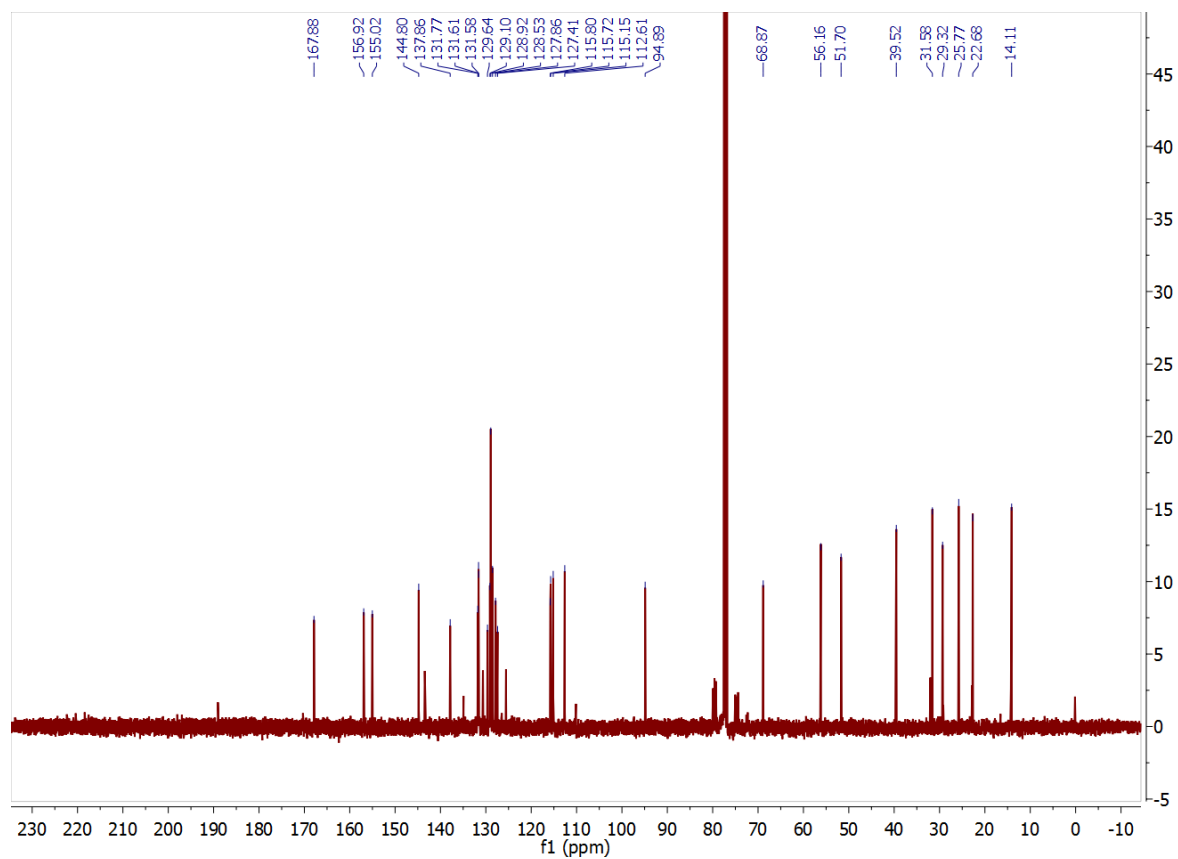

**Figure S37. <sup>1</sup>H NMR spectrum of (*E*)-3-(5'-allyl-2'-(hexyloxy)-6-hydroxy-[1,1'-biphenyl]-3-yl)acrylic acid (10)**

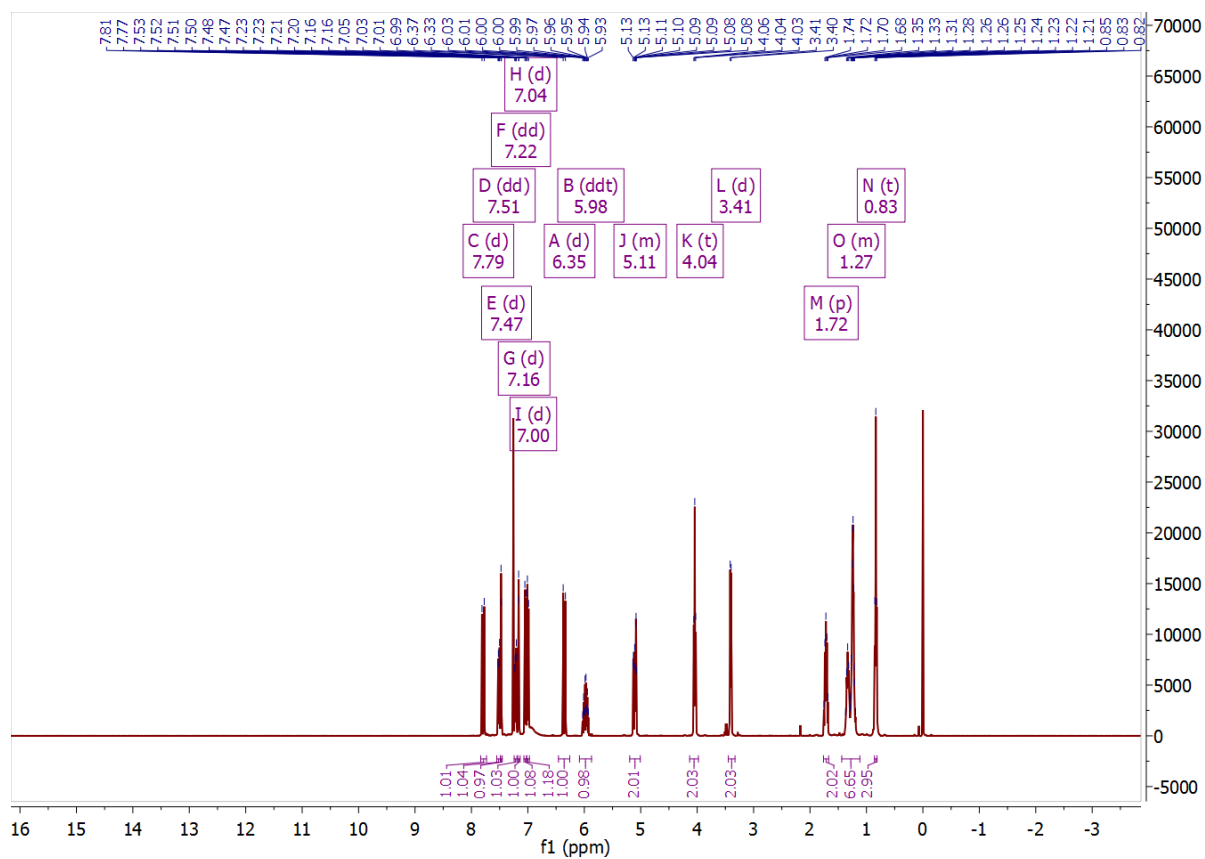

**Figure S38. <sup>13</sup>C NMR spectrum of (*E*)-3-(5'-allyl-2'-(hexyloxy)-6-hydroxy-[1,1'-biphenyl]-3-yl)acrylic acid (10)**

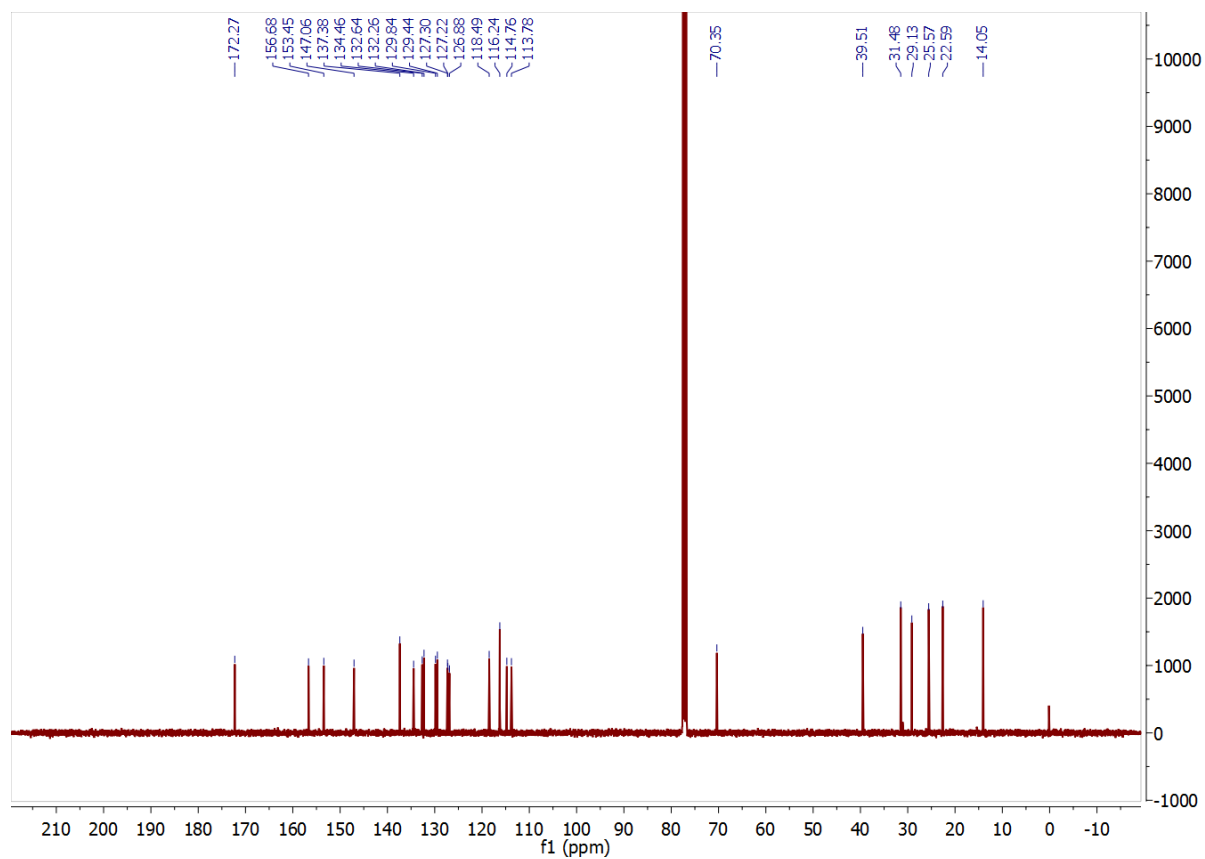

Figure S39. <sup>1</sup>H NMR spectrum of 4-bromo-2-chloro-1-(methoxymethoxy)benzene

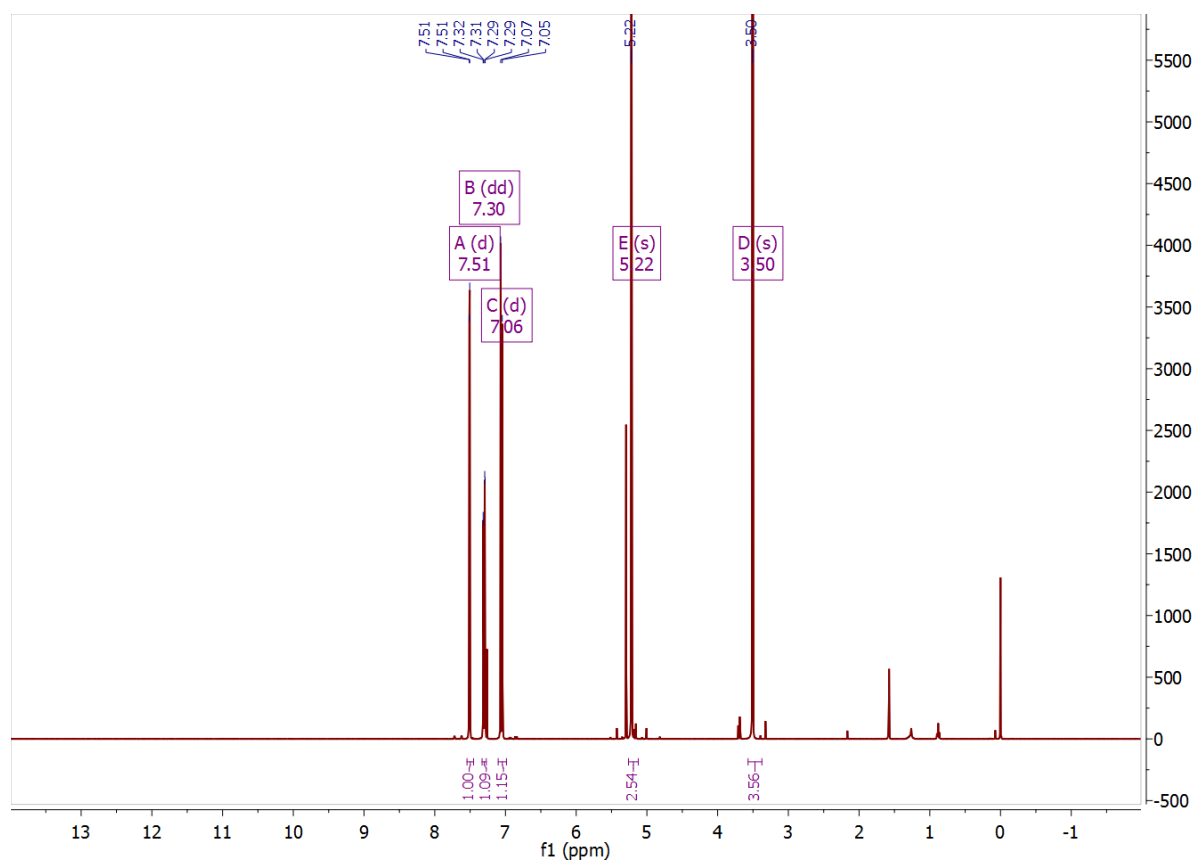

Figure S40. <sup>13</sup>C NMR spectrum of 4-bromo-2-chloro-1-(methoxymethoxy)benzene

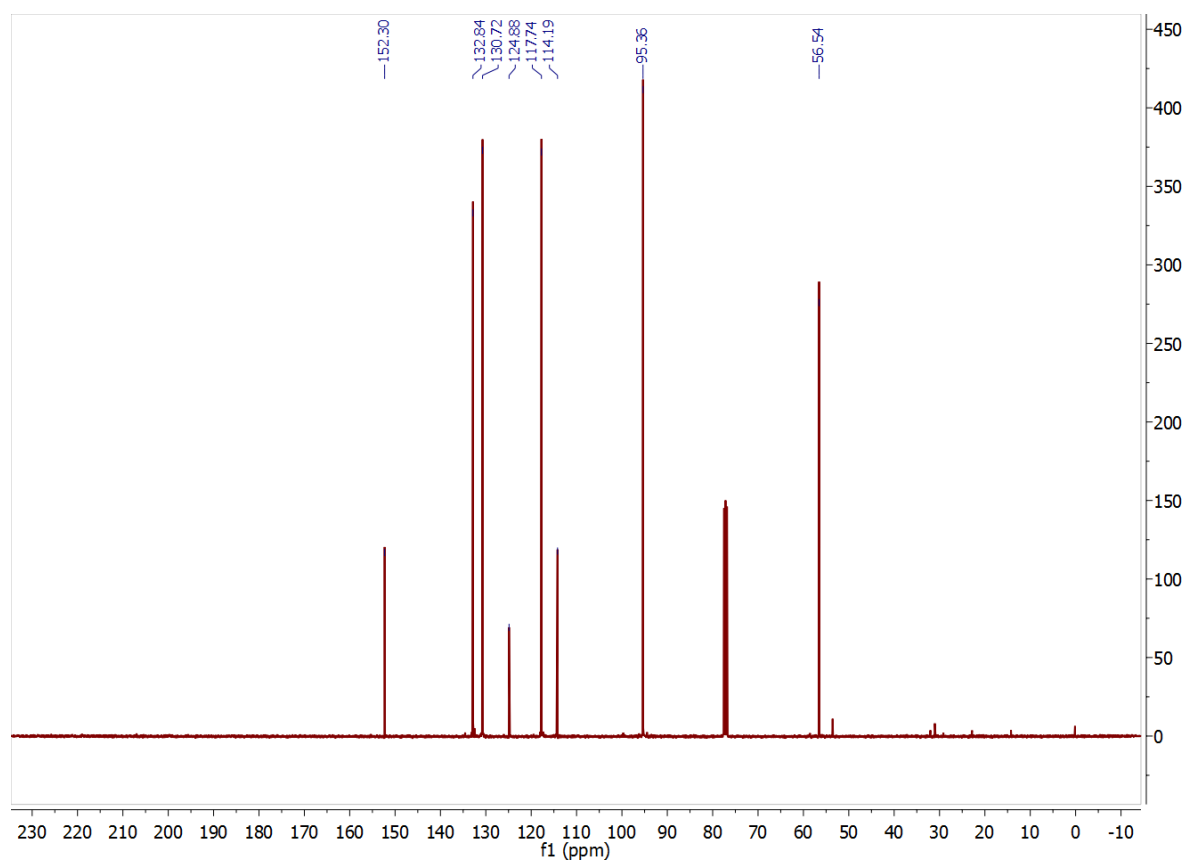

**Figure S41. <sup>1</sup>H NMR spectrum of (*E*)-methyl 3-(3-chloro-4-(methoxymethoxy)phenyl)acrylate (17)**

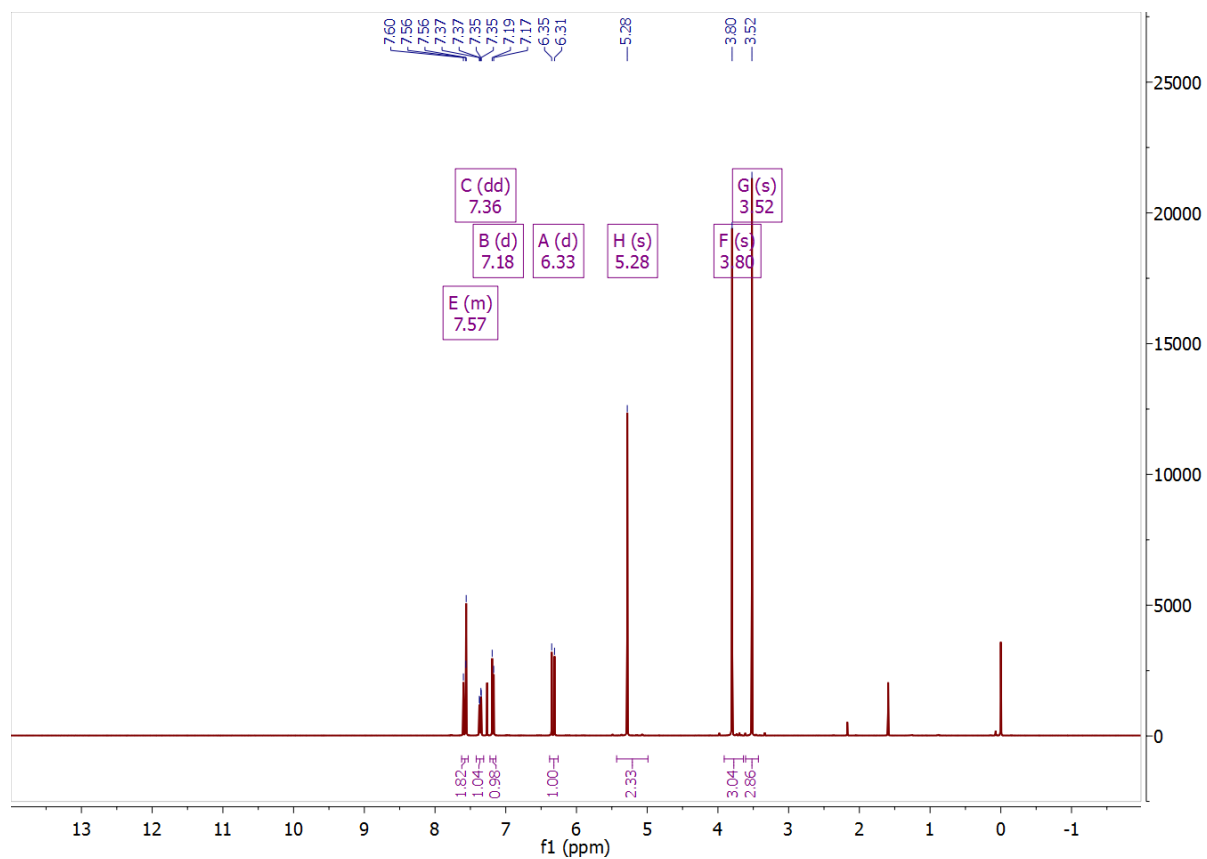

**Figure S42.  $^{13}\text{C}$  NMR spectrum of (*E*)-methyl 3-(3-chloro-4-(methoxymethoxy)phenyl)acrylate (17)**

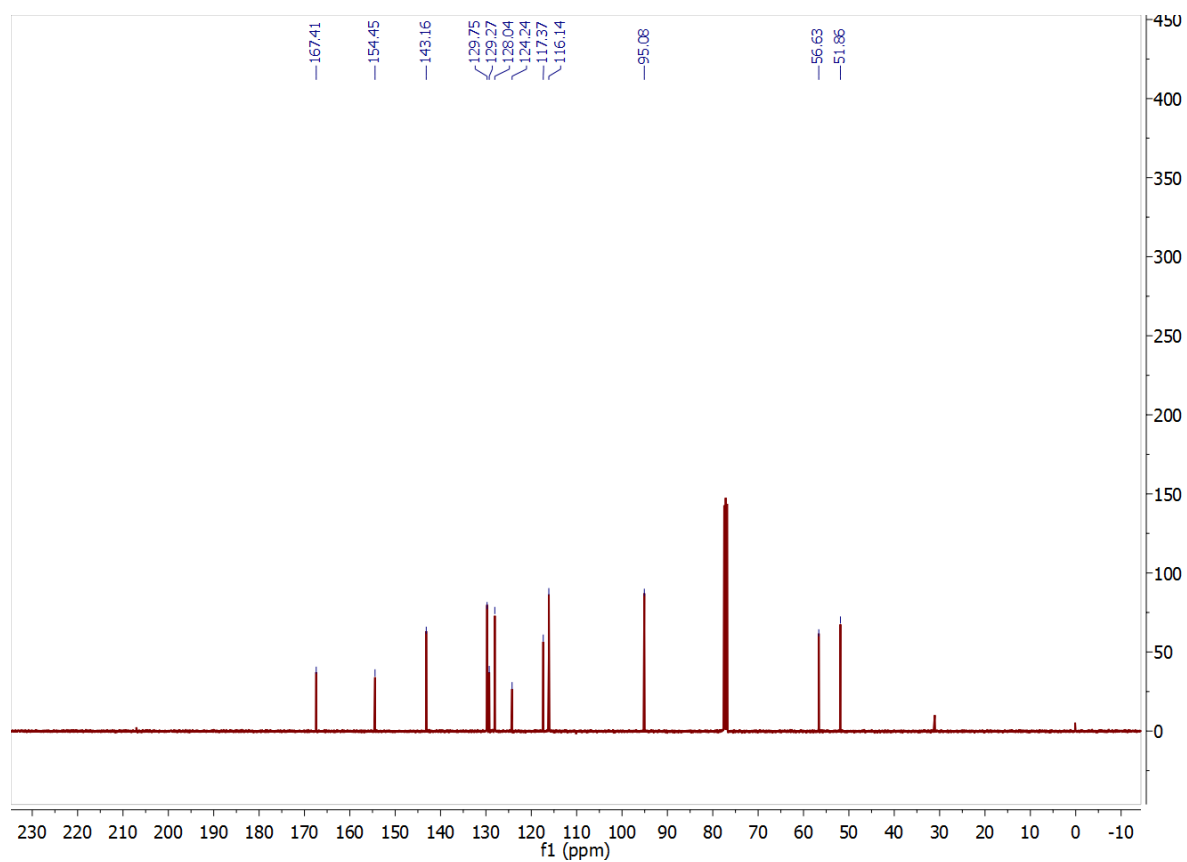

Figure S43. <sup>1</sup>H NMR spectrum of (*E*)-methyl 3-(4-(methoxymethoxy)-3-(4,4,5,5-tetramethyl-1,3,2-dioxaborolan-2-yl)phenyl)acrylate (18)

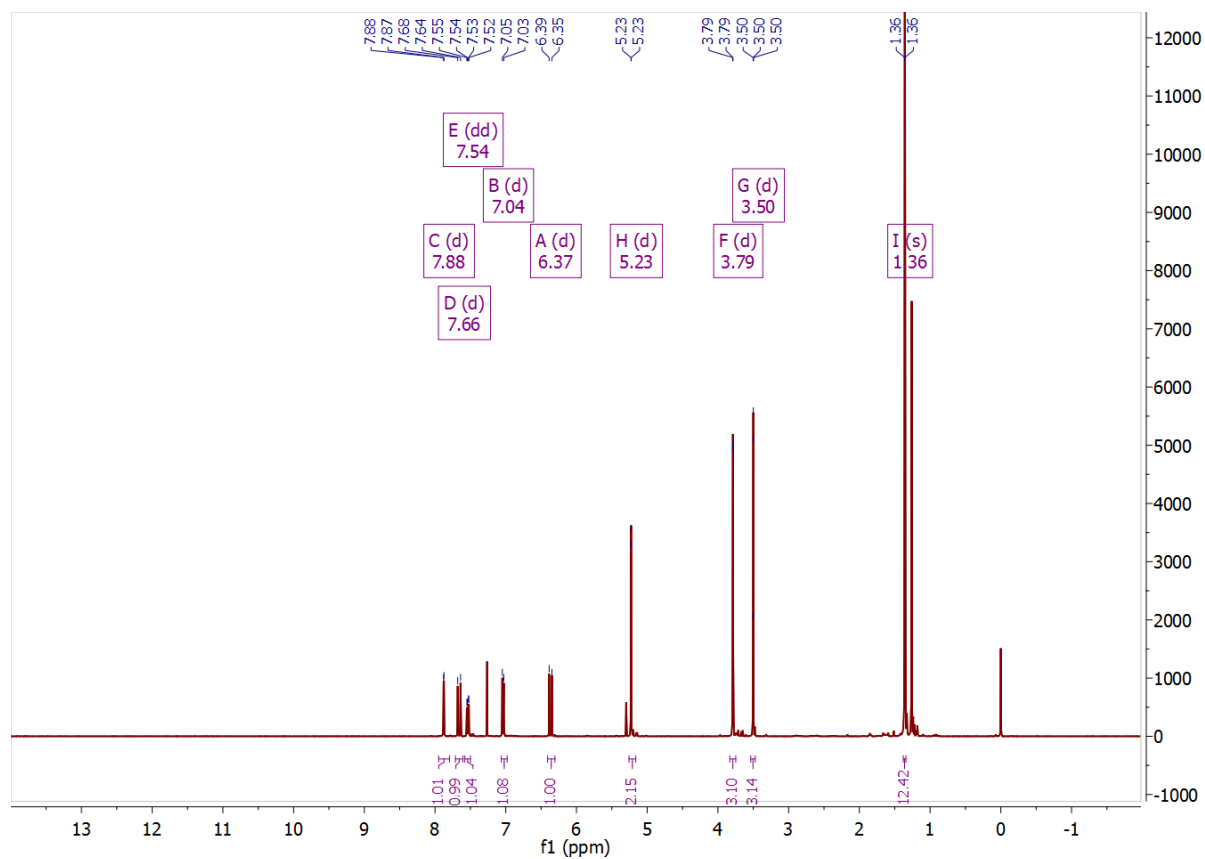



**Figure S44.  $^{13}\text{C}$  NMR spectrum of (*E*)-methyl 3-(4-(methoxymethoxy)-3-(4,4,5,5-tetramethyl-1,3,2-dioxaborolan-2-yl)phenyl)acrylate (18)**

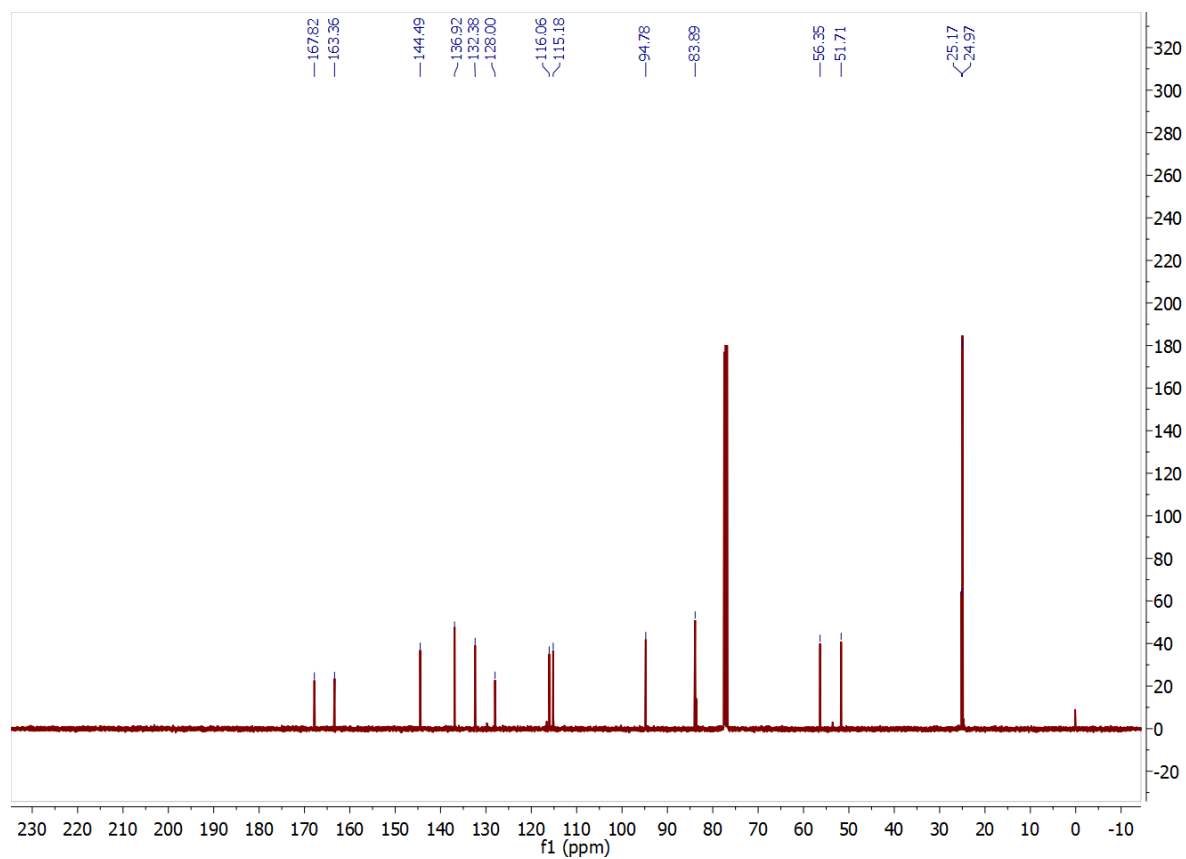

Figure S45. <sup>1</sup>H NMR spectrum of 4-bromo-2-chloro-1-propoxybenzene

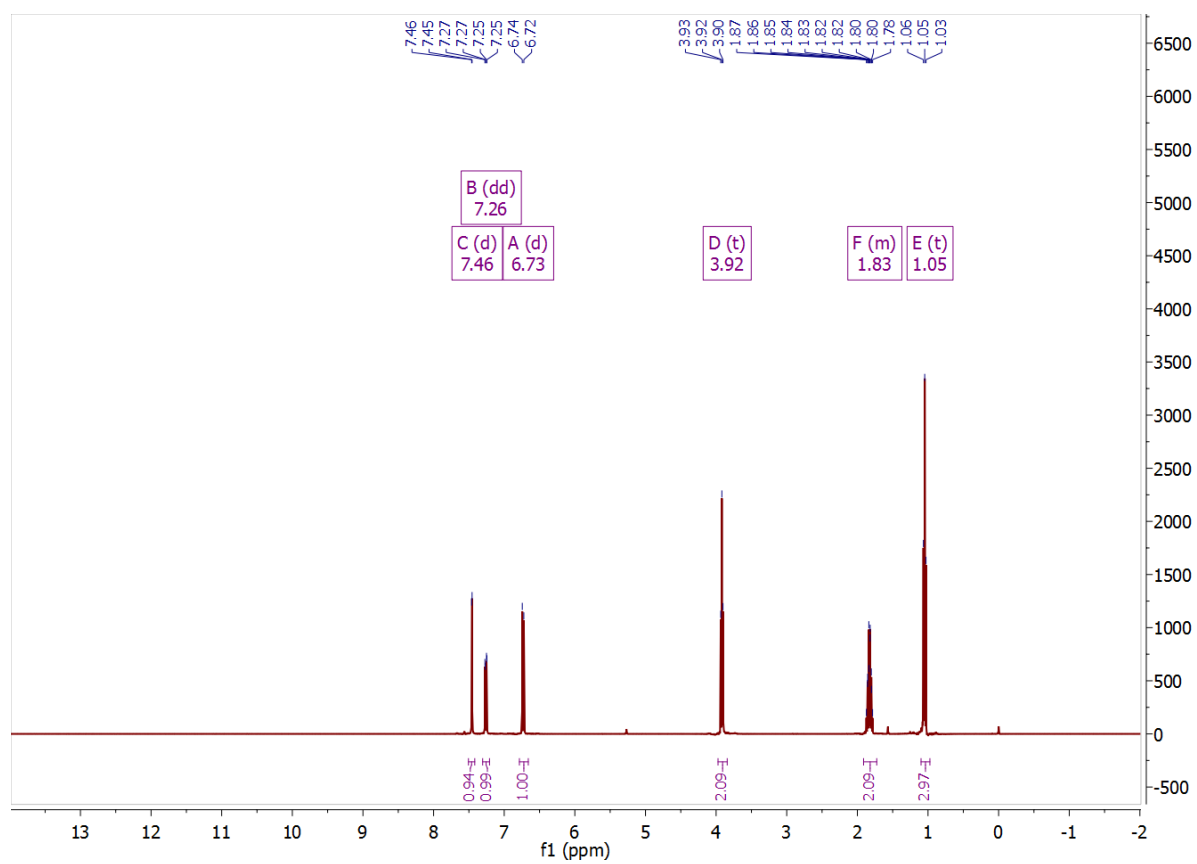

Figure S46. <sup>13</sup>C NMR spectrum of 4-bromo-2-chloro-1-propoxybenzene

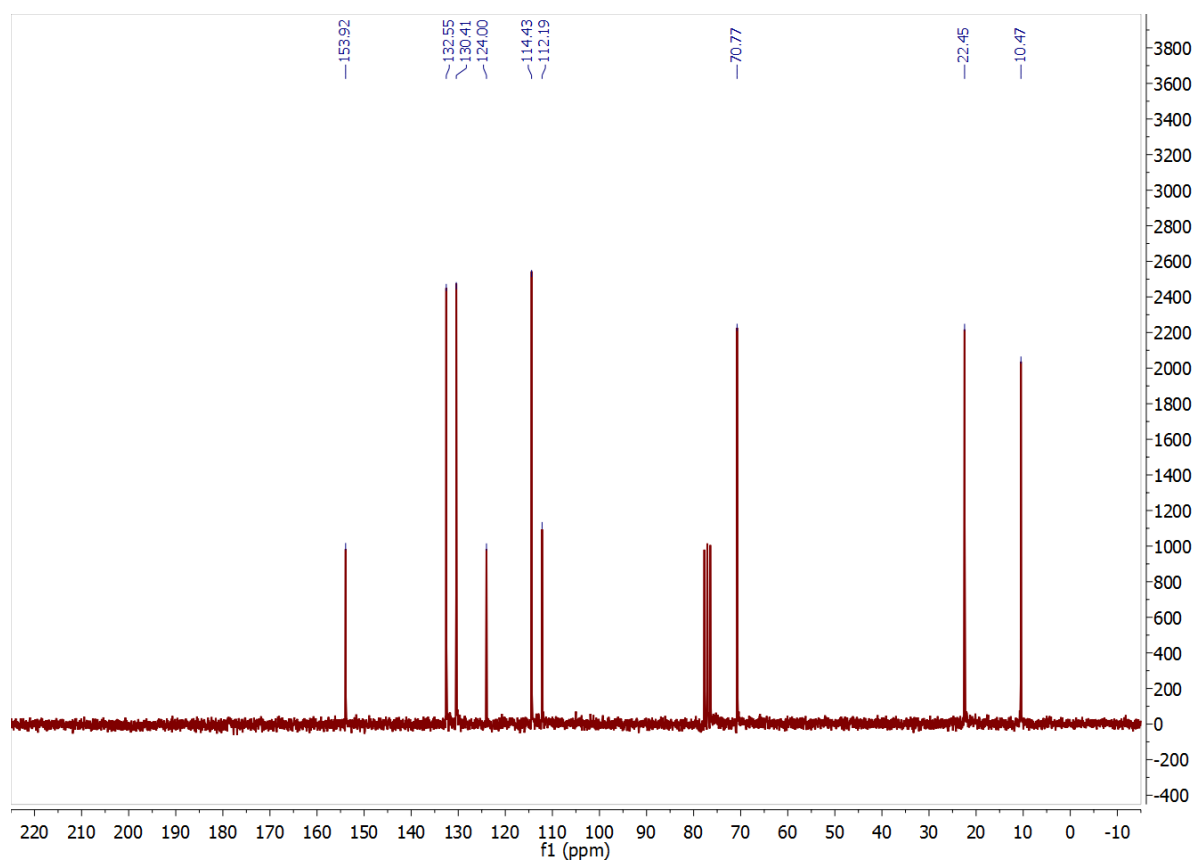

Figure S47. <sup>1</sup>H NMR spectrum of 4-allyl-2-chloro-1-propoxybenzene (23)

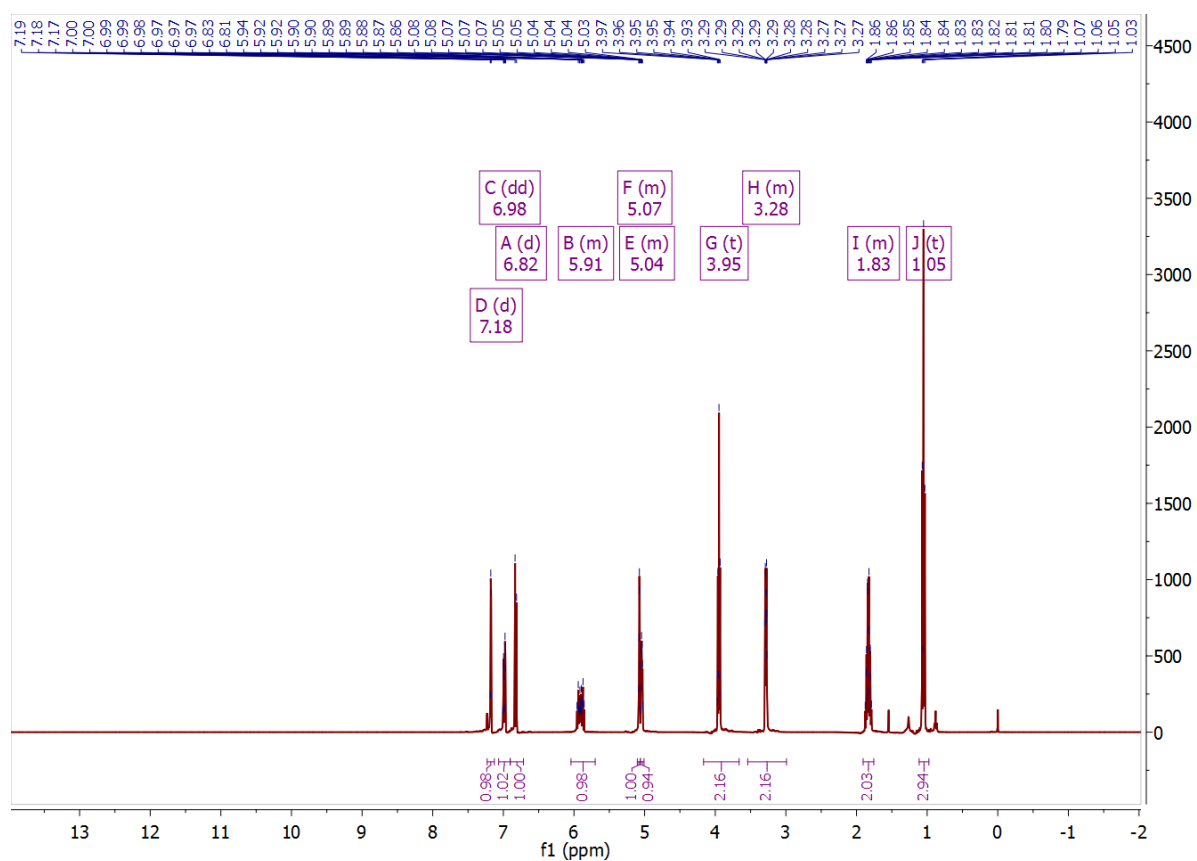

Figure S48. <sup>13</sup>C NMR spectrum of 4-allyl-2-chloro-1-propoxybenzene (23)

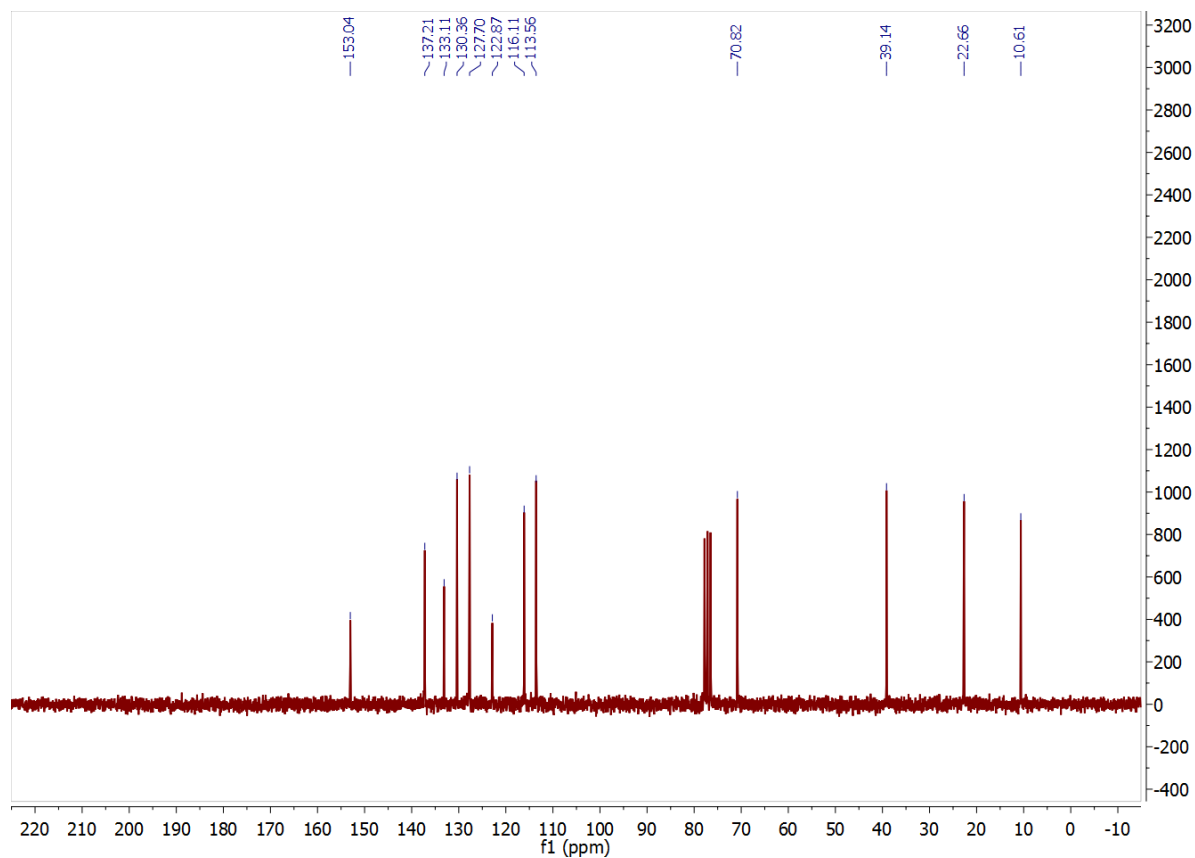

Figure S49. <sup>1</sup>H NMR spectrum of 4-bromo-2-chloro-1-(hexyloxy)benzene

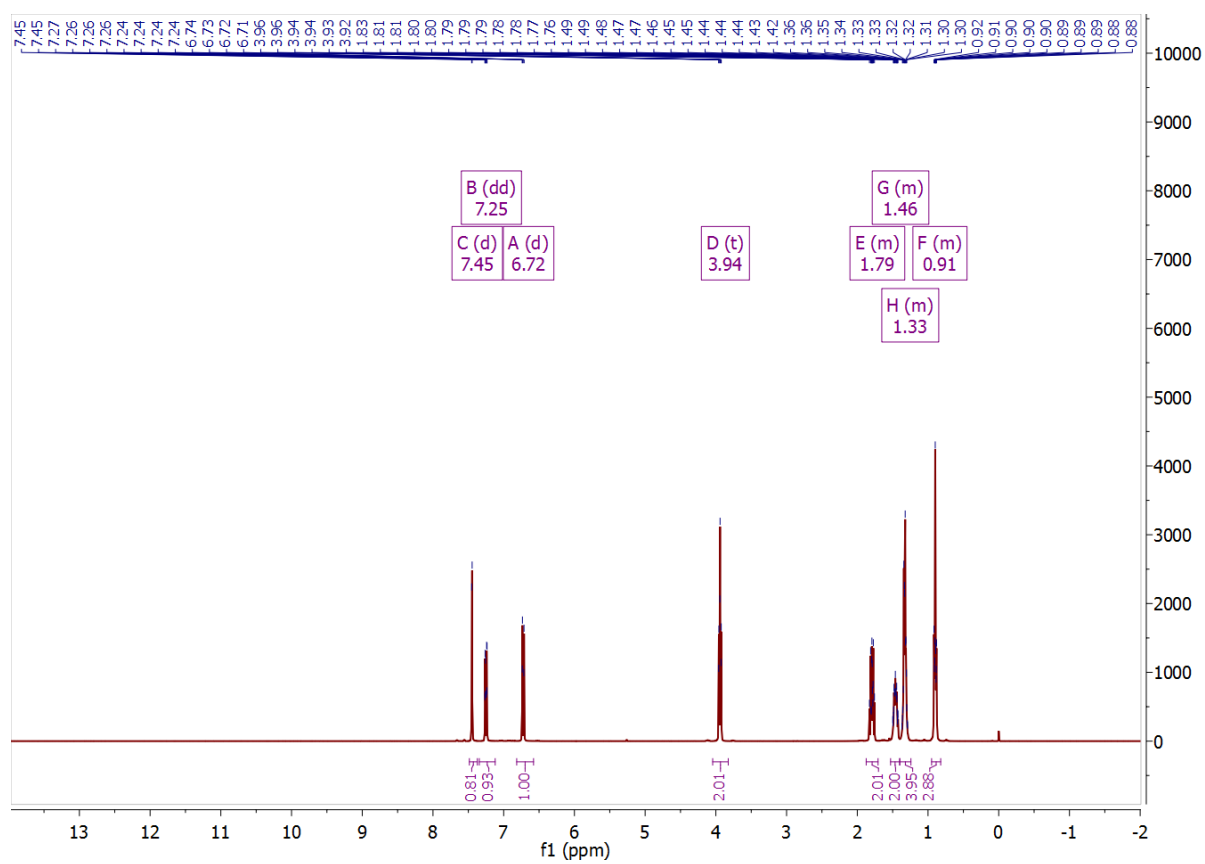

Figure S50. <sup>13</sup>C NMR spectrum of 4-bromo-2-chloro-1-(hexyloxy)benzene

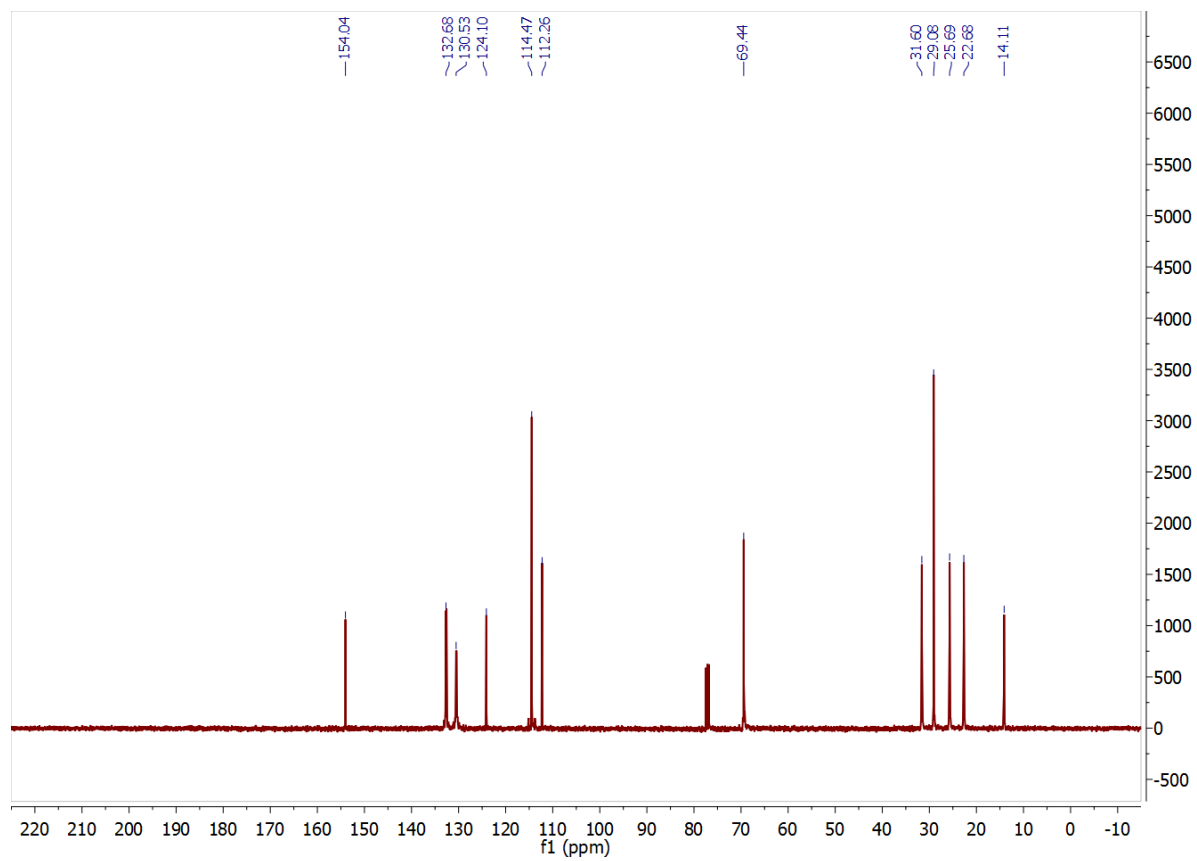

Figure S51. <sup>1</sup>H NMR spectrum of 4-allyl-2-chloro-1-(hexyloxy)benzene (24)

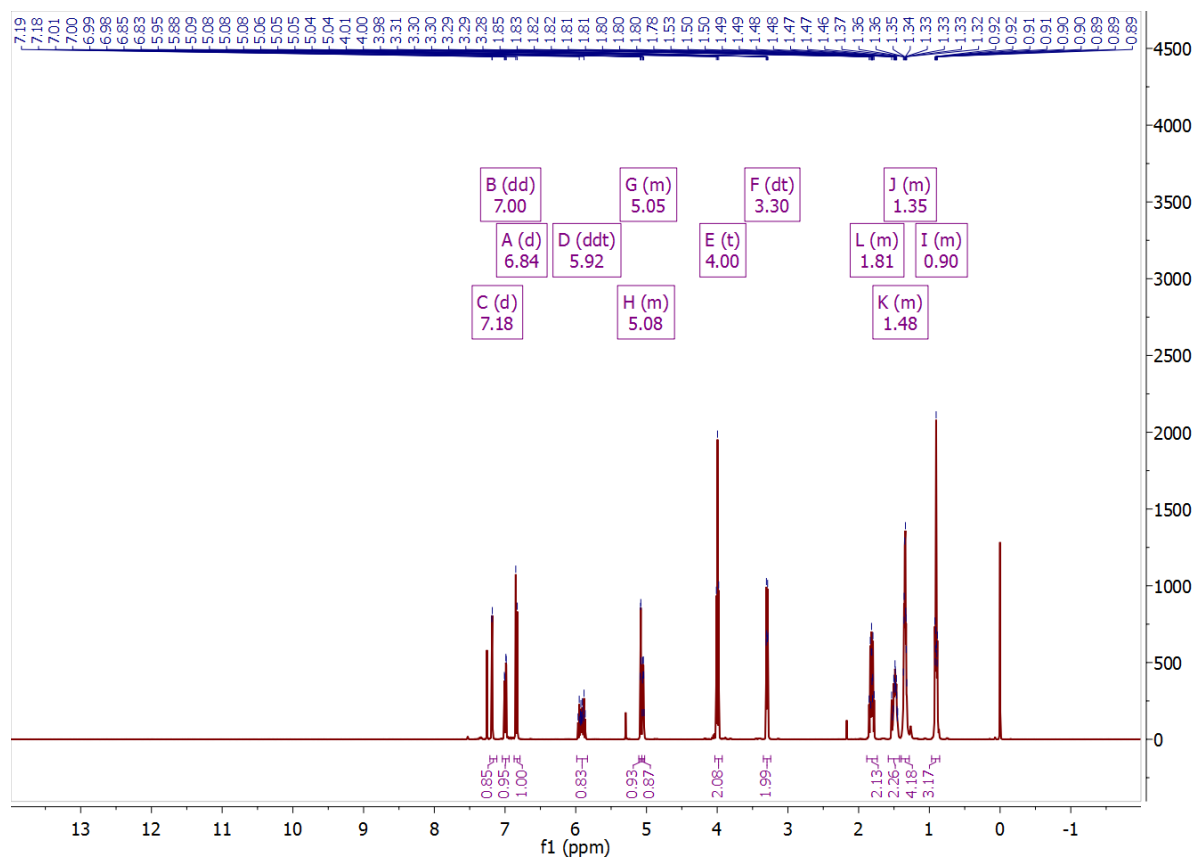



Figure S52. <sup>13</sup>C NMR spectrum of 4-allyl-2-chloro-1-(hexyloxy)benzene (24)

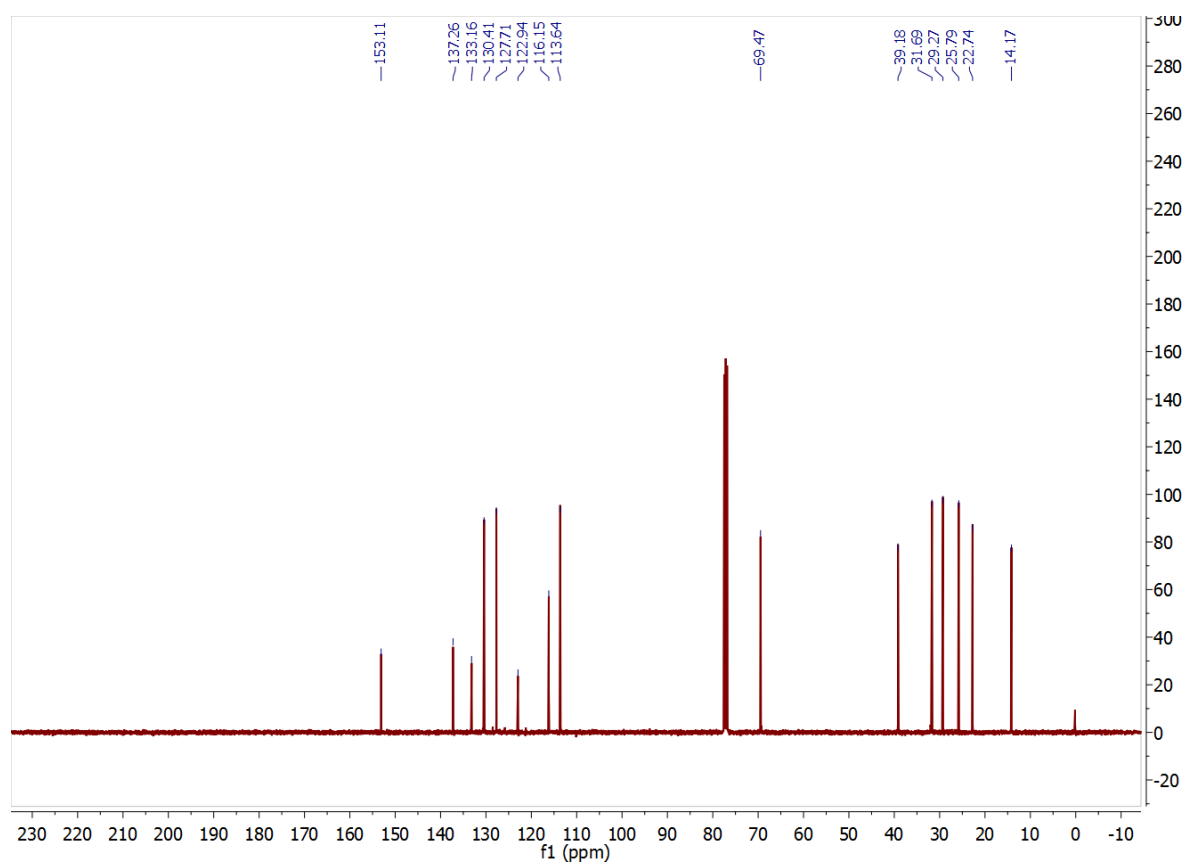

Figure S53. LC-MS data for (*E*)-3-(6-hydroxy-[1,1':3',1''-terphenyl]-3-yl)acrylic acid (2)

Z:\z-schijf uitwerk-pcl...MS350-F1  
a:8

9/2/2015 19:06:12  
D:\methods\Lech\general\_method100-2000.meth

2.000000

RT: 0.00 - 15.00

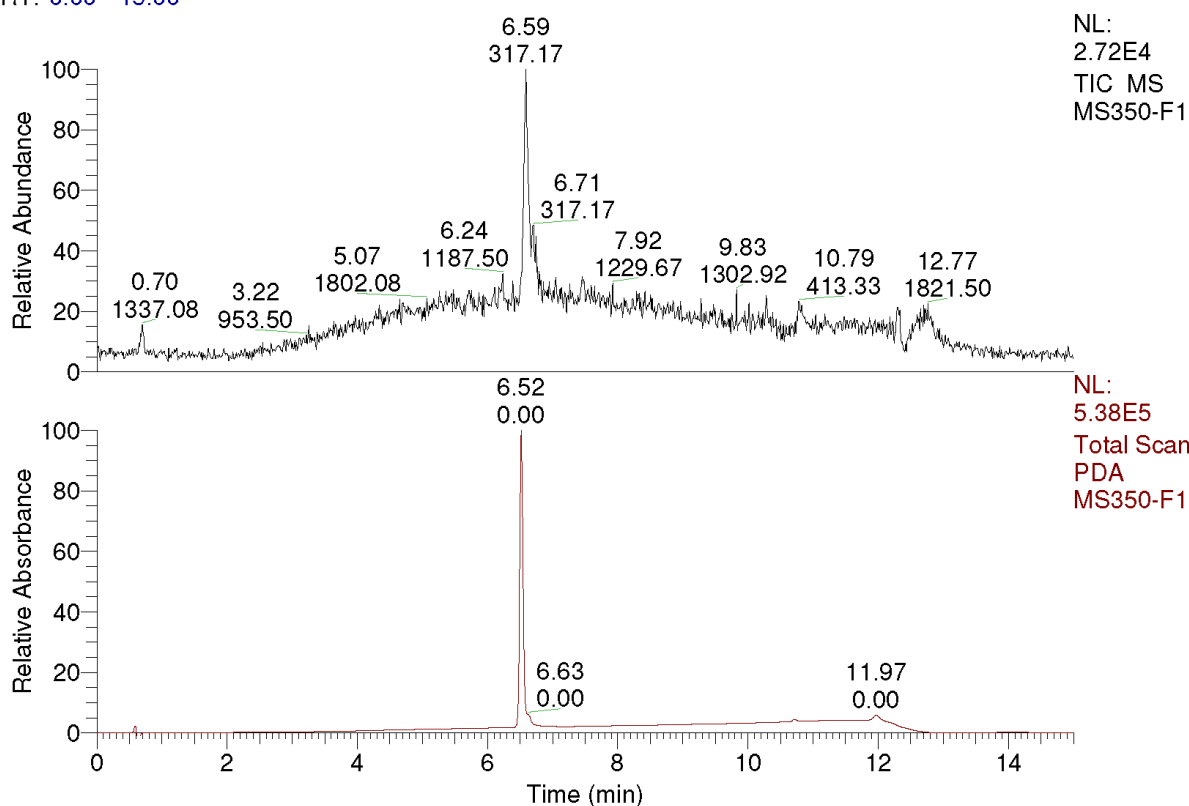

MS350-F1 #520-525 RT: 6.58-6.64 AV: 6 NL: 8.95E2

T: ITMS + p ESI Full ms [100.00-2000.00]

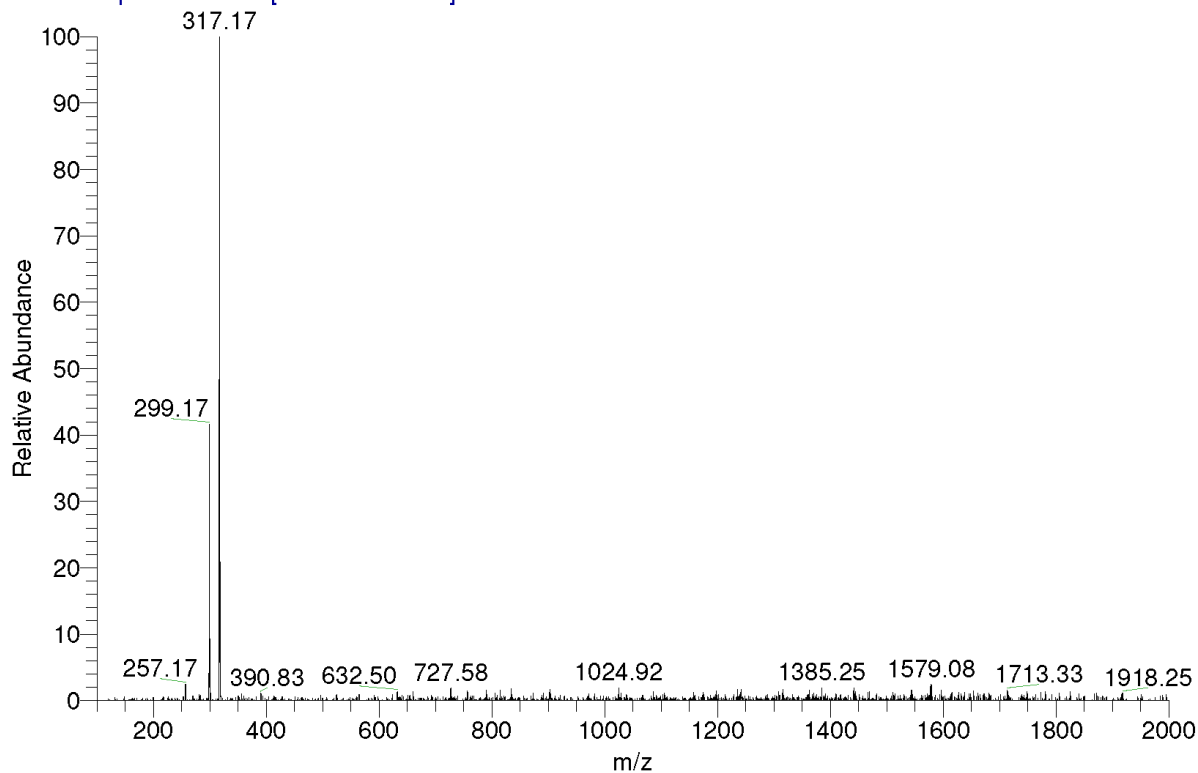

**Figure S54. LC-MS data for (*E*)-3-(3'-benzyl-6-hydroxy-[1,1'-biphenyl]-3-yl)acrylic acid (3)**

Z:\z-schijf uitwerk-pcl...MS354-F1  
a:2

9/3/2015 17:37:29  
D:\methods\Lech\general\_method100-2000.meth

2.000000

RT: 0.00 - 15.00

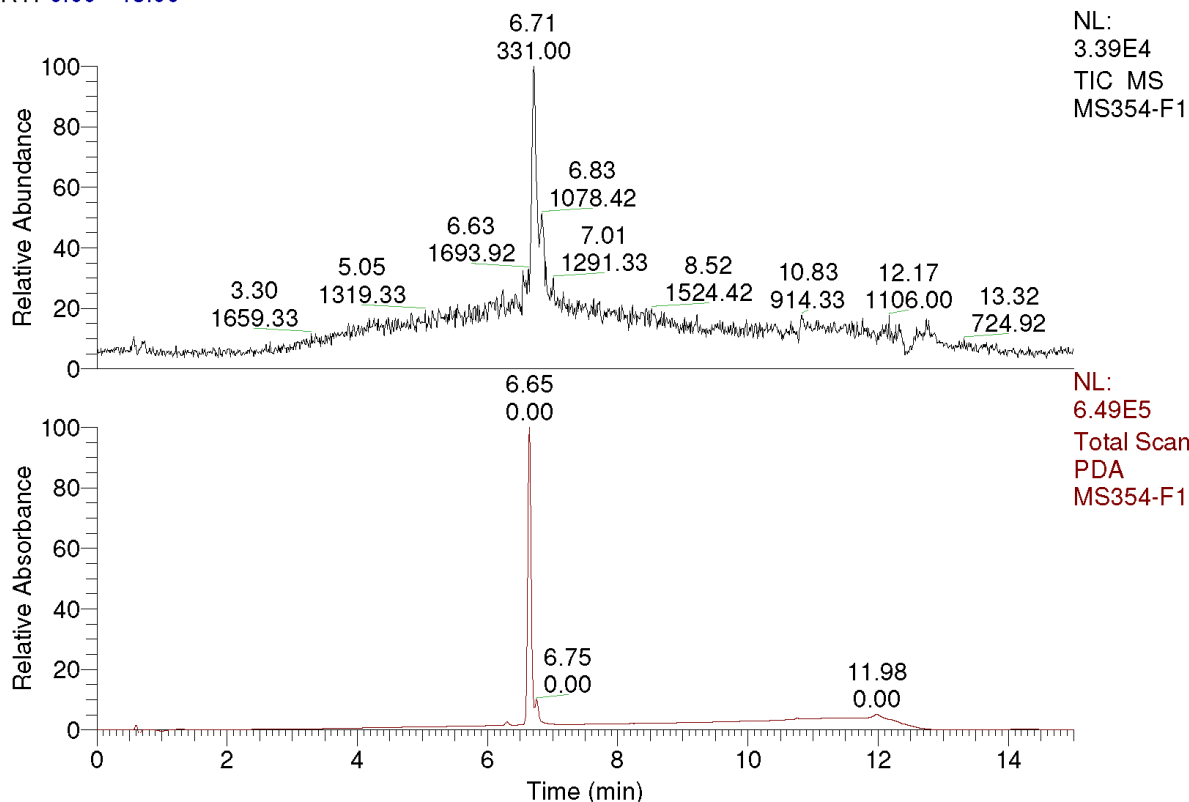

MS354-F1 #528 RT: 6.68 AV: 1 NL: 9.60E2  
 T: ITMS + p ESI Full ms [100.00-2000.00]

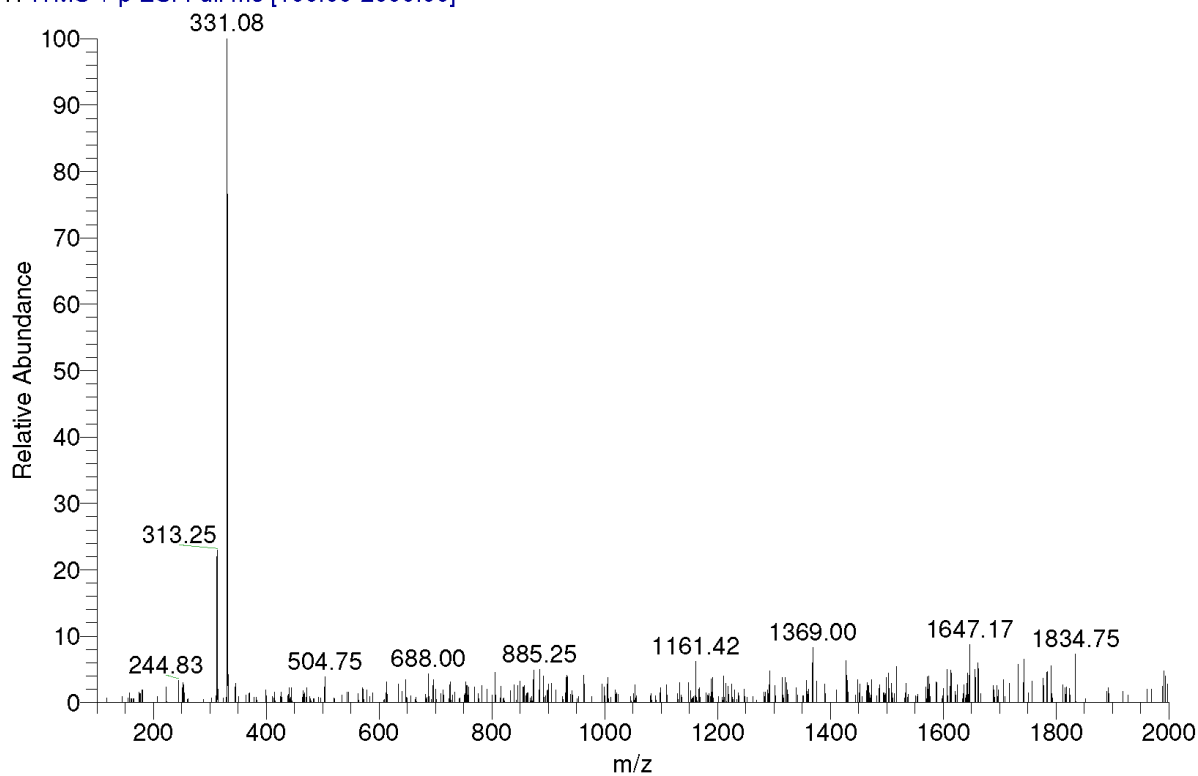

Figure S55. LC-MS data for (*E*)-3-(6-hydroxy-3'-isopropyl-[1,1'-biphenyl]-3-yl)acrylic acid (4)

Z:\z-schijf uitwerk-pcl...MS349-prep2-3  
b:2

9/2/2015 12:24:44  
D:\methods\Lech\general\_method100-2000.meth

2.000000

RT: 0.00 - 15.00

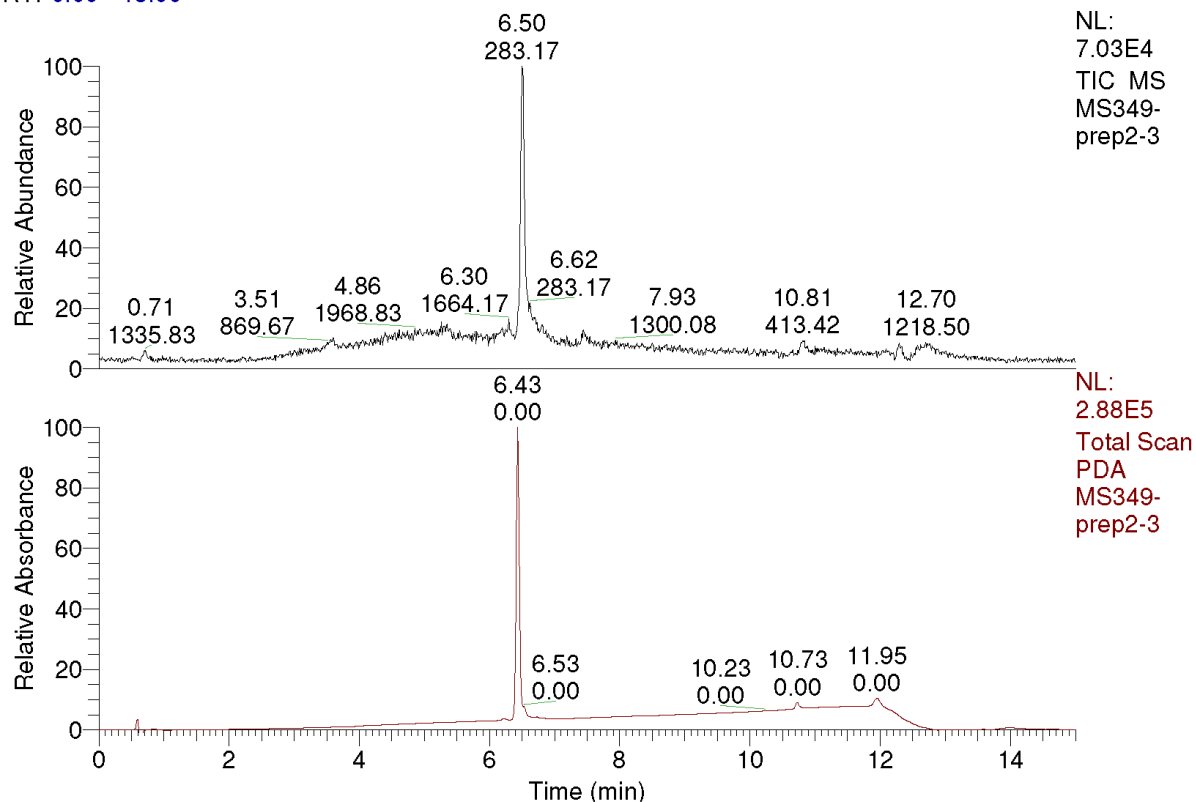

MS349-prep2-3 #510-521 RT: 6.45-6.59 AV: 12 NL: 1.22E3  
T: ITMS + p ESI Full ms [100.00-2000.00]

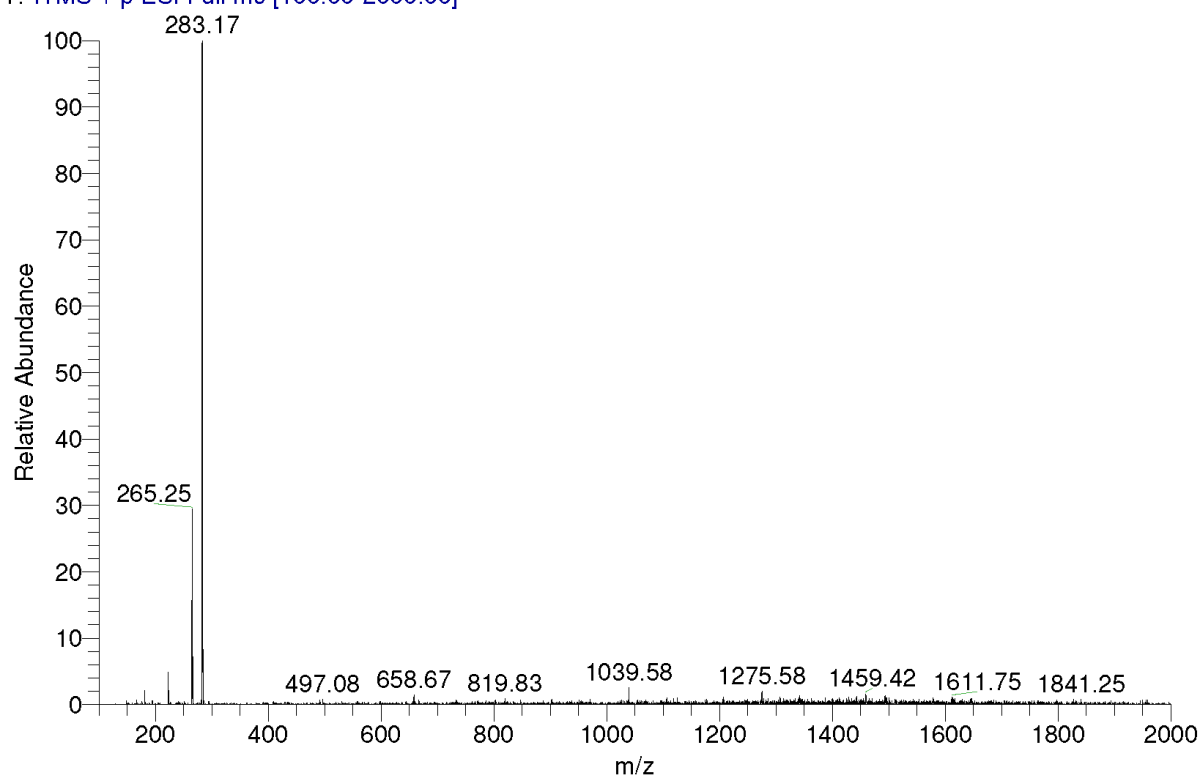

**Figure S56. LC-MS data for (*E*)-3-(6-hydroxy-2'-methyl-[1,1':3',1''-terphenyl]-3-yl)acrylic acid (6)**

\\tuemass\st\_mass\_smo\...MS396-run2  
2.000000

19/05/2016 14:25:45  
D:\methods\Lech Milroy\general\_method100-2000.mea.3

RT: 0.00 - 15.00

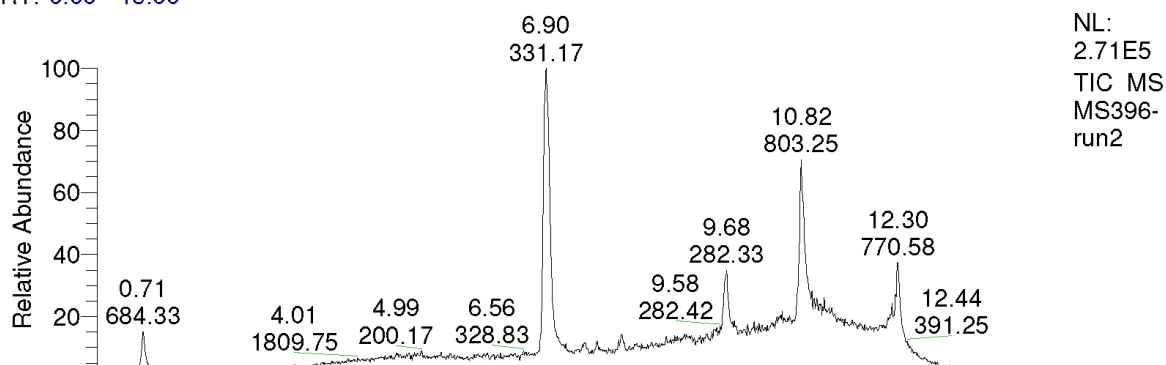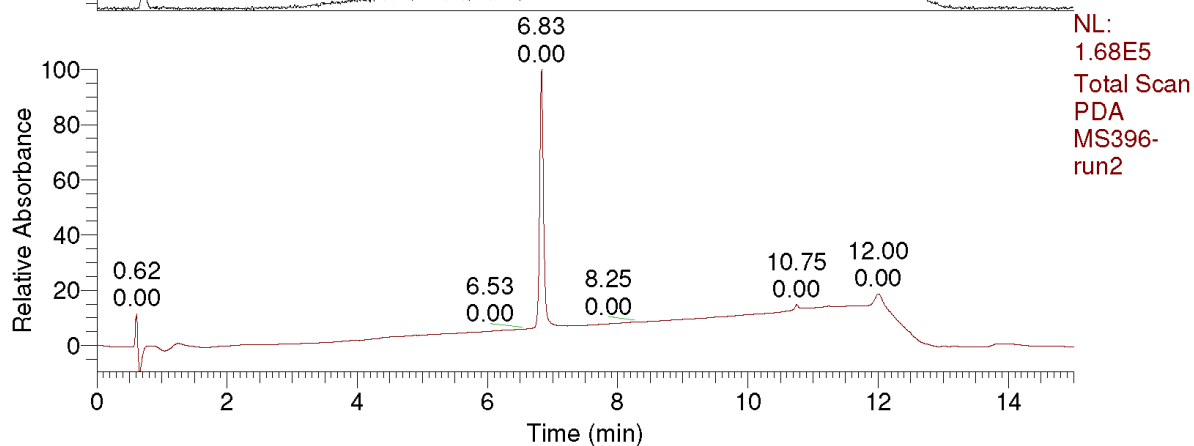

MS396-run2 #540-555 RT: 6.84-7.03 AV: 16 NL: 1.10E4  
T: ITMS + p ESI Full ms [100.00-2000.00]

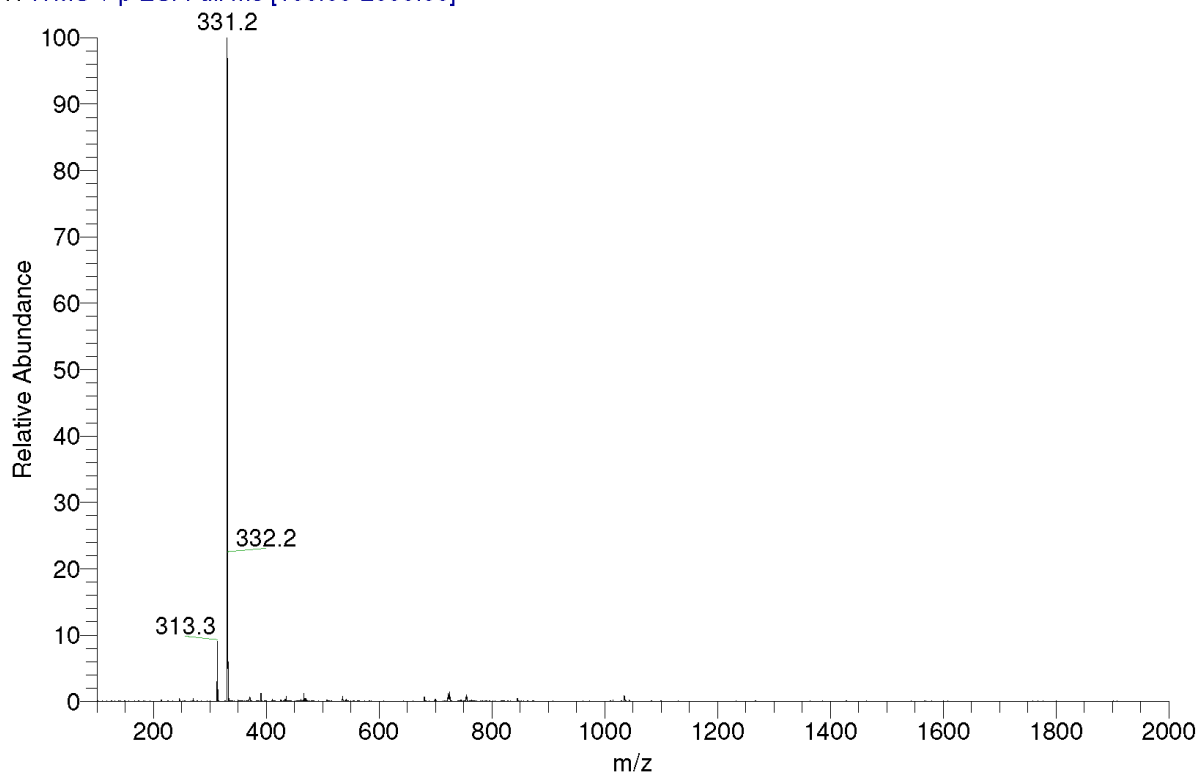

**Figure S57. LC-MS data for (*E*)-3-(6-hydroxy-6'-methyl-[1,1':3',1''-terphenyl]-3-yl)acrylic acid (7)**

\\tuemass\st\_mass\_smo\...MS395-final  
2.000000

03/03/2016 15:31:13  
D:\methods\Lech\general\_method100-2000.meth A:2

RT: 0.00 - 15.00

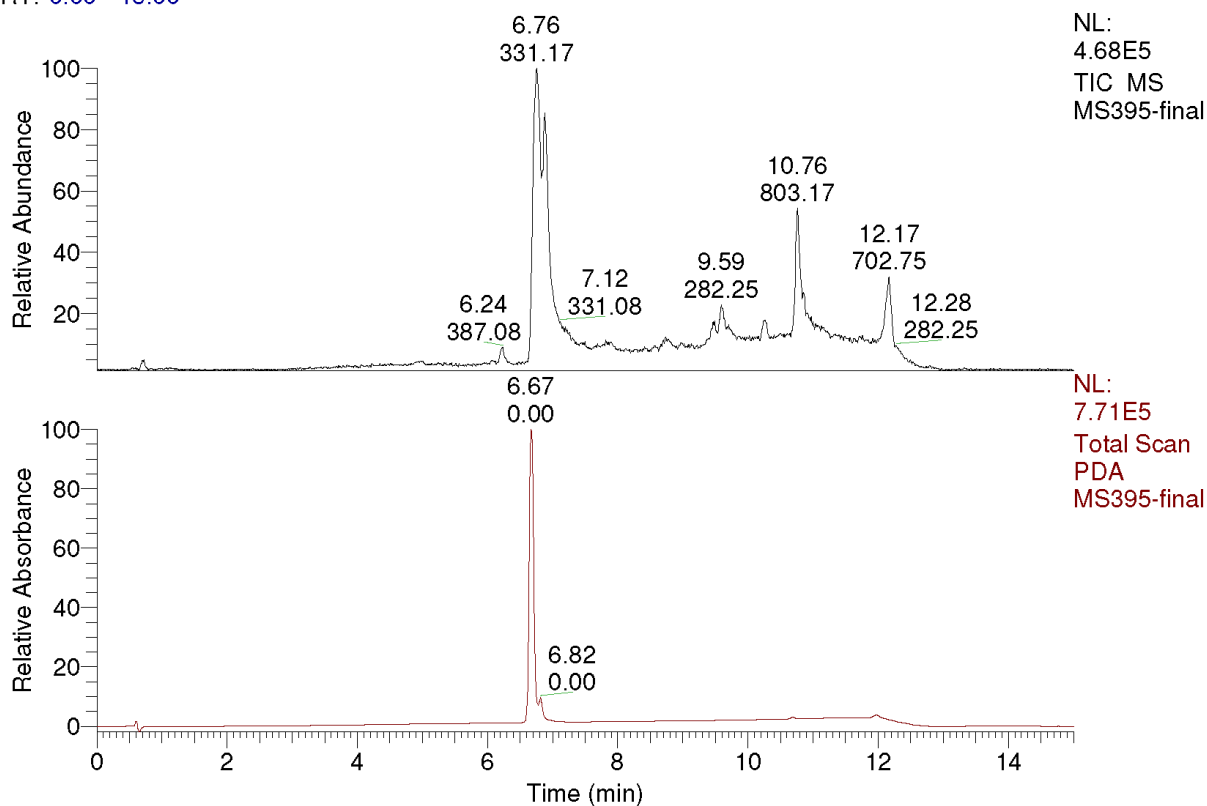

MS395-final #529-537 RT: 6.69-6.79 AV: 9 NL: 4.34E4  
T: ITMS + p ESI Full ms [100.00-2000.00]

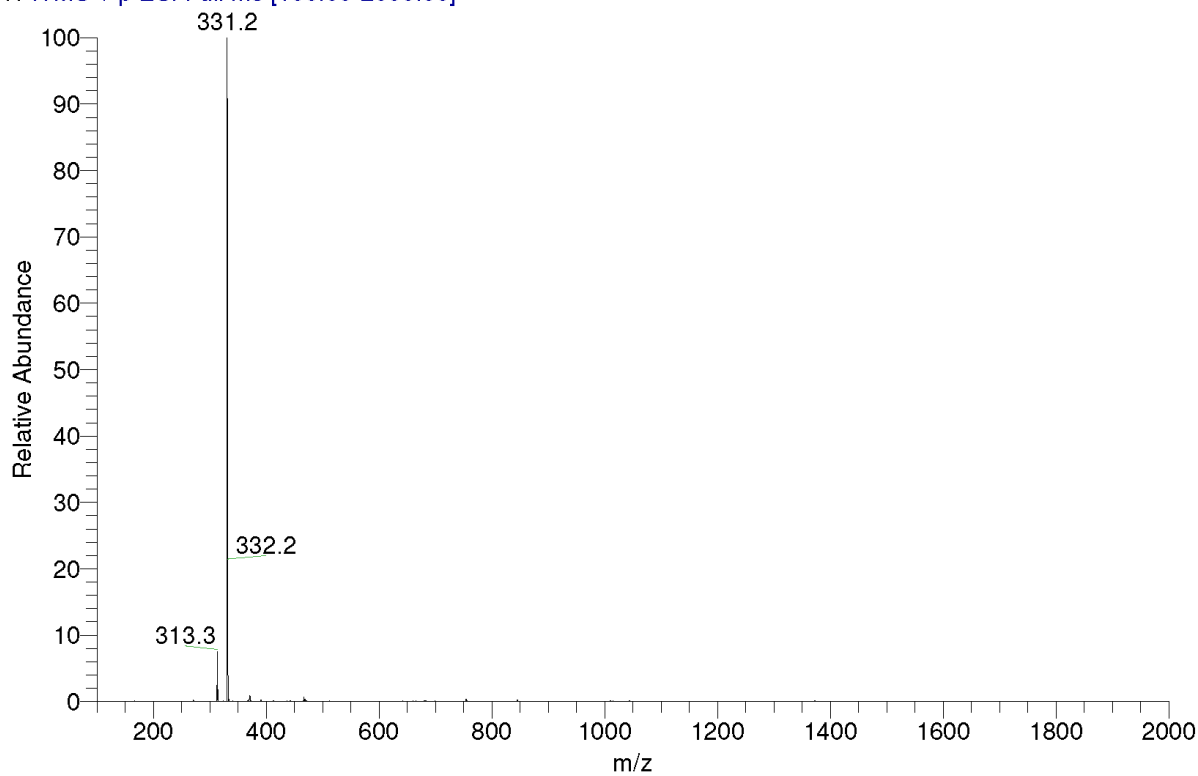

**Figure S58. LC-MS data for (*E*)-3-(5'-allyl-6-hydroxy-2'-propoxy-[1,1'-biphenyl]-3-yl)acrylic acid (**9**)**

\\tuemass\st\_mass\_smo\...MS383-pure  
2.000000

04/02/2016 17:47:26  
D:\methods\Lech\general\_method100-2000.meth a:1

RT: 0.00 - 15.00

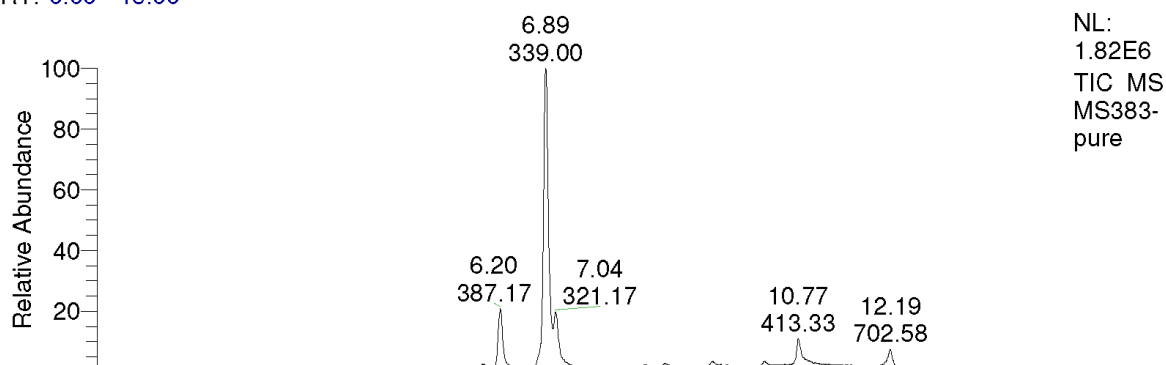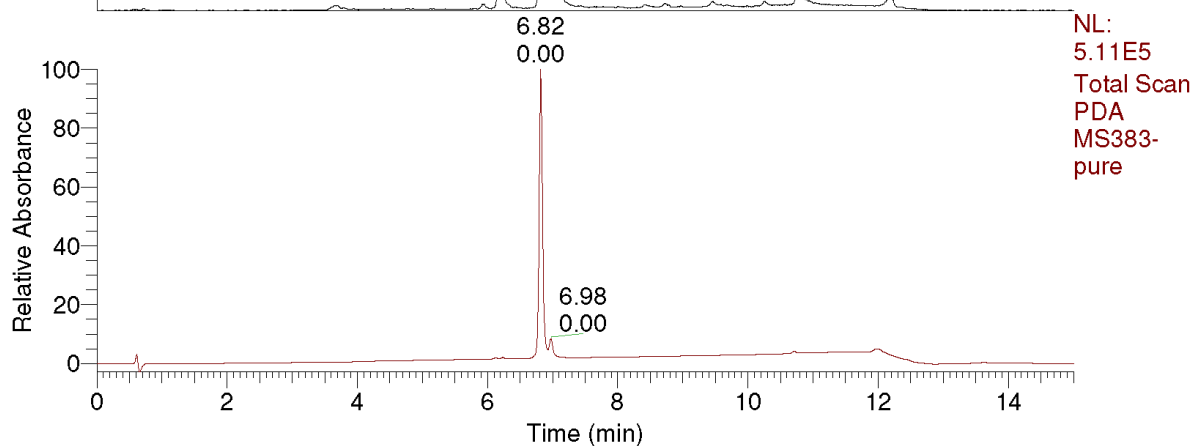

MS383-pure #537-553 RT: 6.79-6.99 AV: 17 NL: 3.62E4  
T: ITMS + p ESI Full ms [100.00-2000.00]

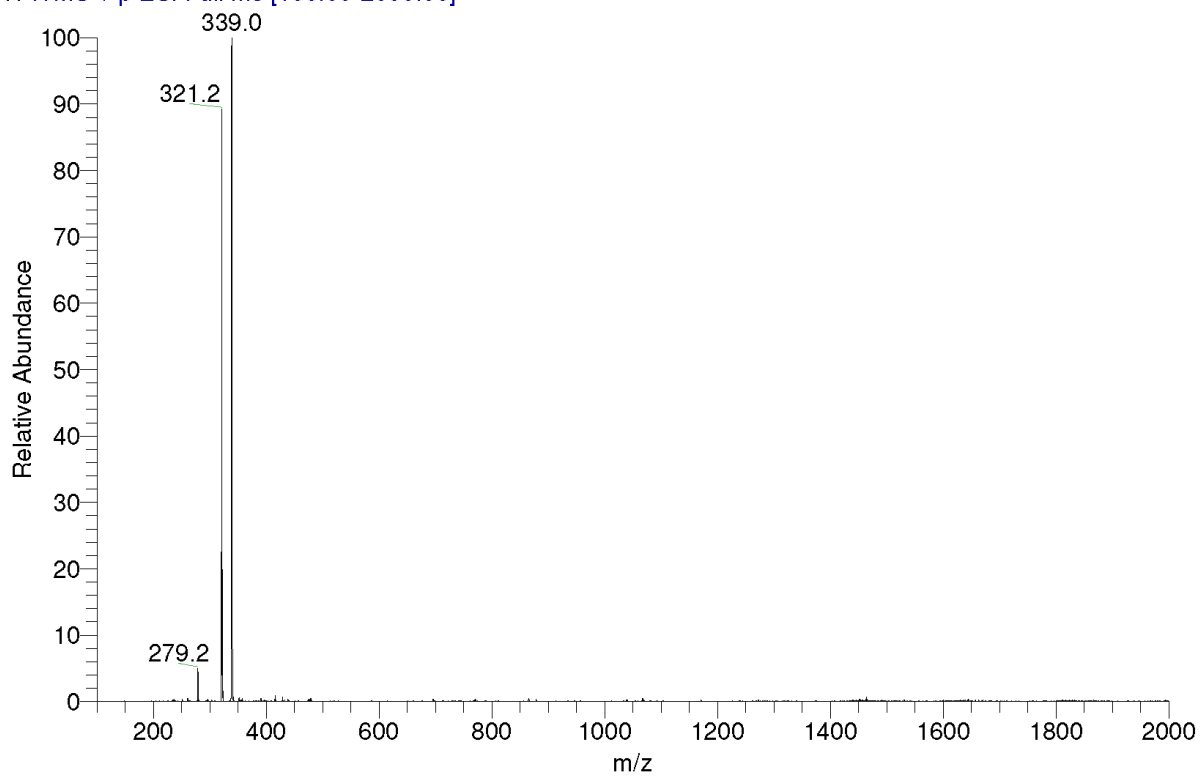

**Figure S59. LC-MS data for (*E*)-3-(5'-allyl-2'-(hexyloxy)-6-hydroxy-[1,1'-biphenyl]-3-yl)acrylic acid (**10**)**

\\tuemass\st\_mass\_smo\...MS384-pure  
2.000000

04/02/2016 18:03:07  
D:\methods\Lech\general\_method100-2000.meth a:2

RT: 0.00 - 15.00

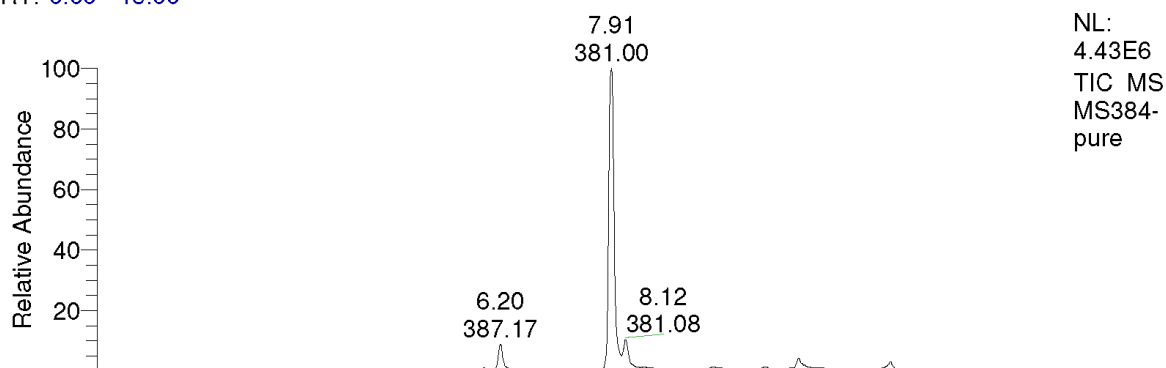

NL:  
4.43E6  
TIC MS  
MS384-  
pure

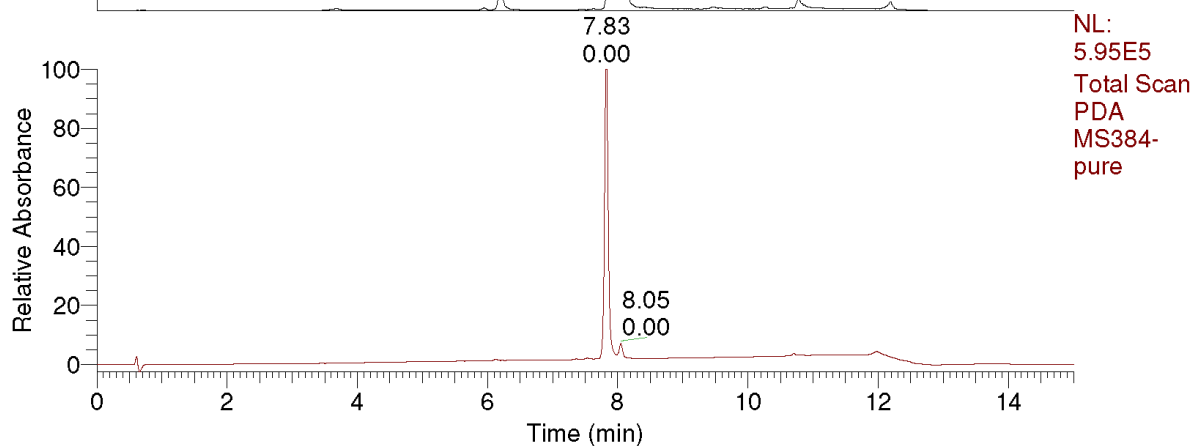

NL:  
5.95E5  
Total Scan  
PDA  
MS384-  
pure

MS384-pure #620-628 RT: 7.85-7.94 AV: 9 NL: 2.02E5  
T: ITMS + p ESI Full ms [100.00-2000.00]

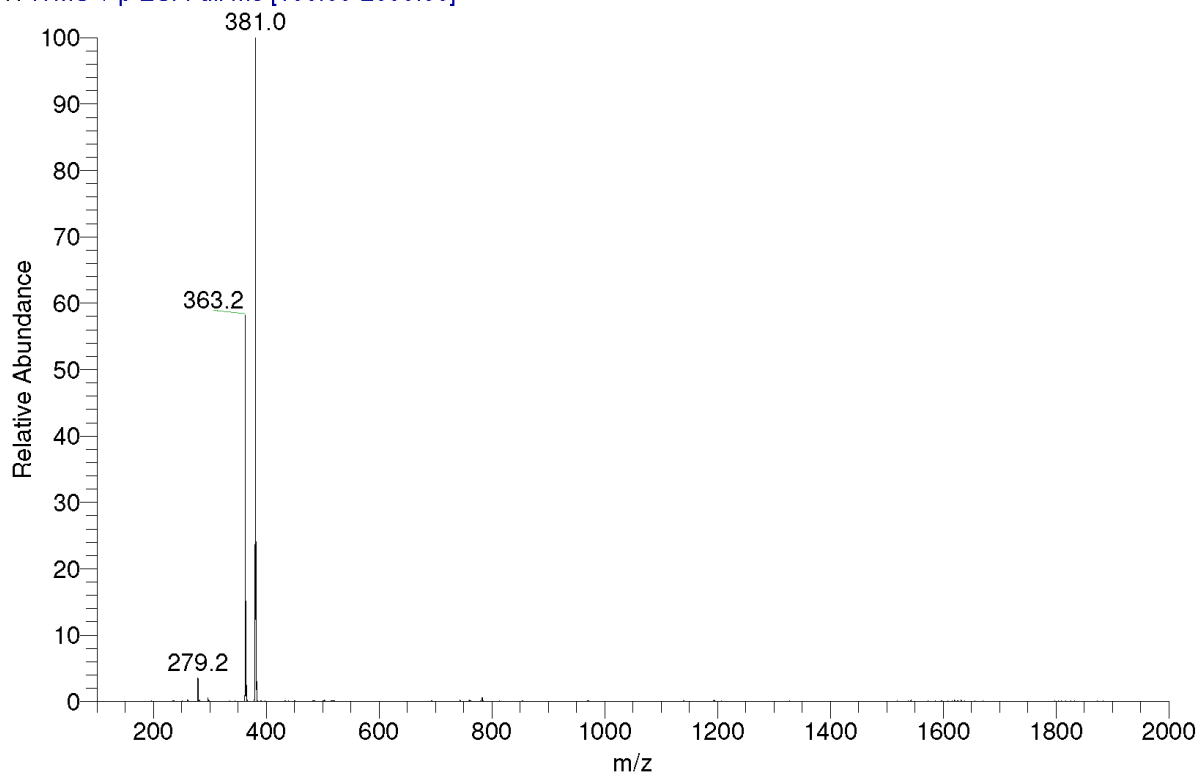



**Figure S60. Overview of key side-chains displacements (in Å) in the helices 5-7 region of the ligand binding domain for ligands 1, 3, 4, 6, and 7.**

**Ile 324**

| cpd | 1   | 3   | 4   | 6   | 7   |
|-----|-----|-----|-----|-----|-----|
| 1   |     | 0.4 | 0.6 | 0.6 | 0.5 |
| 3   | 0.4 |     | 0.3 | 0.2 | 0.1 |
| 4   | 0.6 | 0.3 |     | 0.3 | 0.3 |
| 6   | 0.6 | 0.2 | 0.3 |     | 0.1 |
| 7   | 0.5 | 0.1 | 0.3 | 0.1 |     |

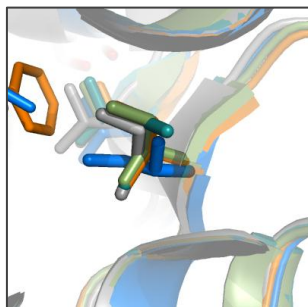

**Val 332**

| cpd | 1   | 3   | 4   | 6   | 7   |
|-----|-----|-----|-----|-----|-----|
| 1   |     | 0.7 | 1.2 | 0.7 | 0.8 |
| 3   | 0.7 |     | 1.6 | 0.7 | 0.7 |
| 4   | 1.2 | 1.6 |     | 1.0 | 1.0 |
| 6   | 0.7 | 0.7 | 1.0 |     | 0.1 |
| 7   | 0.8 | 0.7 | 1.0 | 0.1 |     |

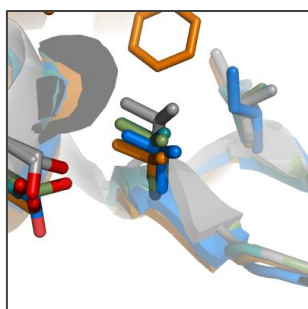

**Ser 336**

| cpd | 1   | 3   | 4   | 6   | 7   |
|-----|-----|-----|-----|-----|-----|
| 1   |     | 0.7 | 2.2 | 0.3 | 0.7 |
| 3   | 0.7 |     | 2.8 | 0.8 | 1.1 |
| 4   | 2.2 | 2.8 |     | 2.0 | 2.2 |
| 6   | 0.3 | 0.8 | 2.0 |     | 0.6 |
| 7   | 0.7 | 1.1 | 2.2 | 0.6 |     |

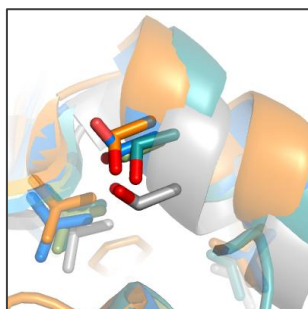

**Val 342**

| cpd | 1   | 3   | 4   | 6   | 7   |
|-----|-----|-----|-----|-----|-----|
| 1   |     | 0.6 | 1.4 | 0.3 | 0.8 |
| 3   | 0.6 |     | 1.7 | 0.7 | 0.8 |
| 4   | 1.4 | 1.7 |     | 1.2 | 0.9 |
| 6   | 0.3 | 0.7 | 1.2 |     | 0.8 |
| 7   | 0.8 | 0.8 | 0.9 | 0.8 |     |

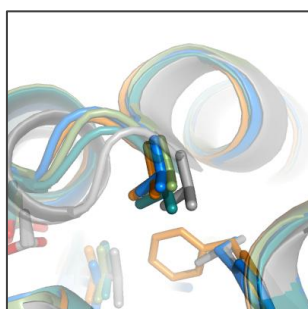

**Figure S61.** Overlay of the X-ray co-crystal structures of ligands 4 (grey) and 6 (green) bound to RXR $\alpha$  as zoom-in on the ligand binding pocket of RXR $\alpha$ .

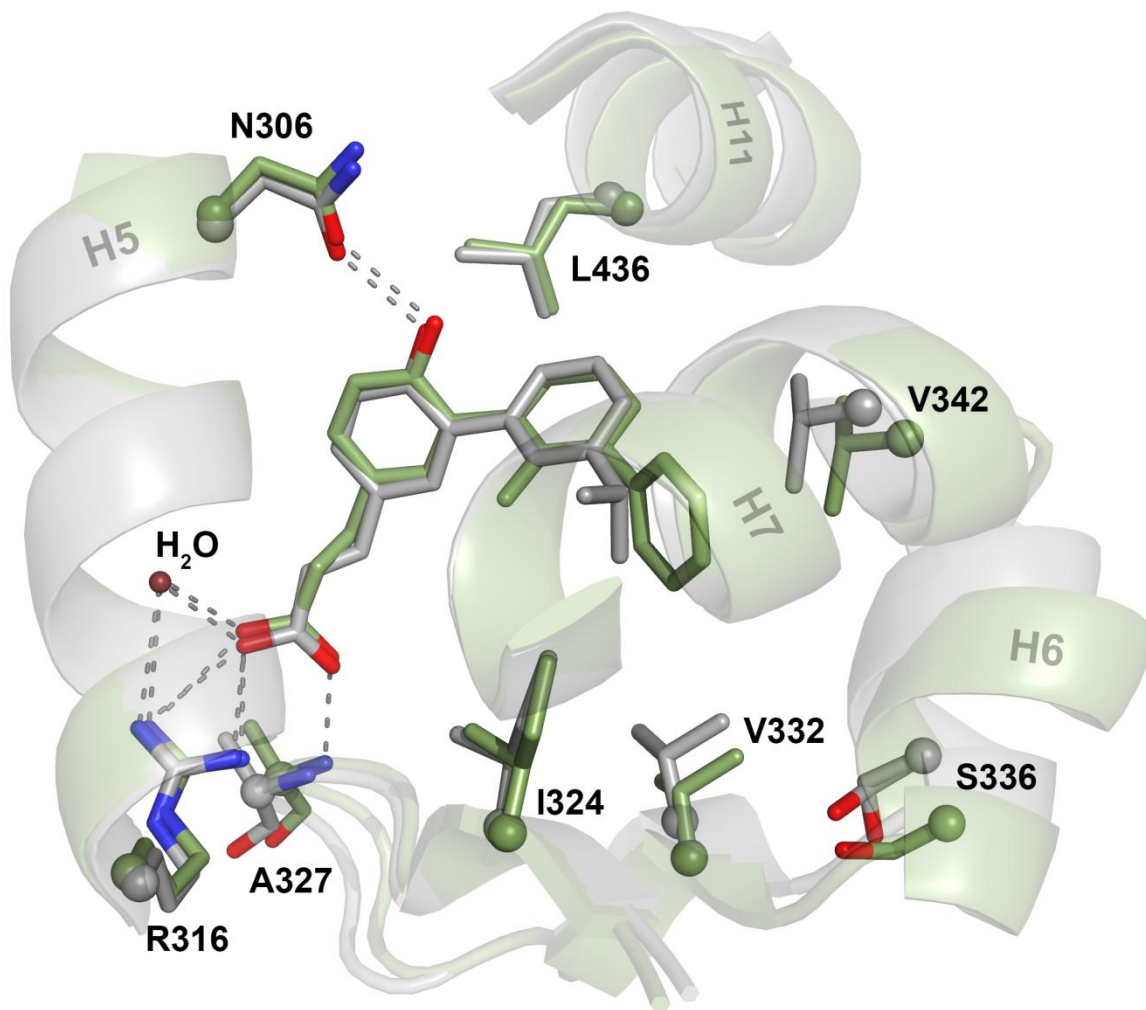

**Figure S62.** Overlay of the X-ray co-crystal structures of ligands 4 (grey) and 7 (blue) bound to RXR $\alpha$  as zoom-in on the ligand binding pocket of RXR $\alpha$ .

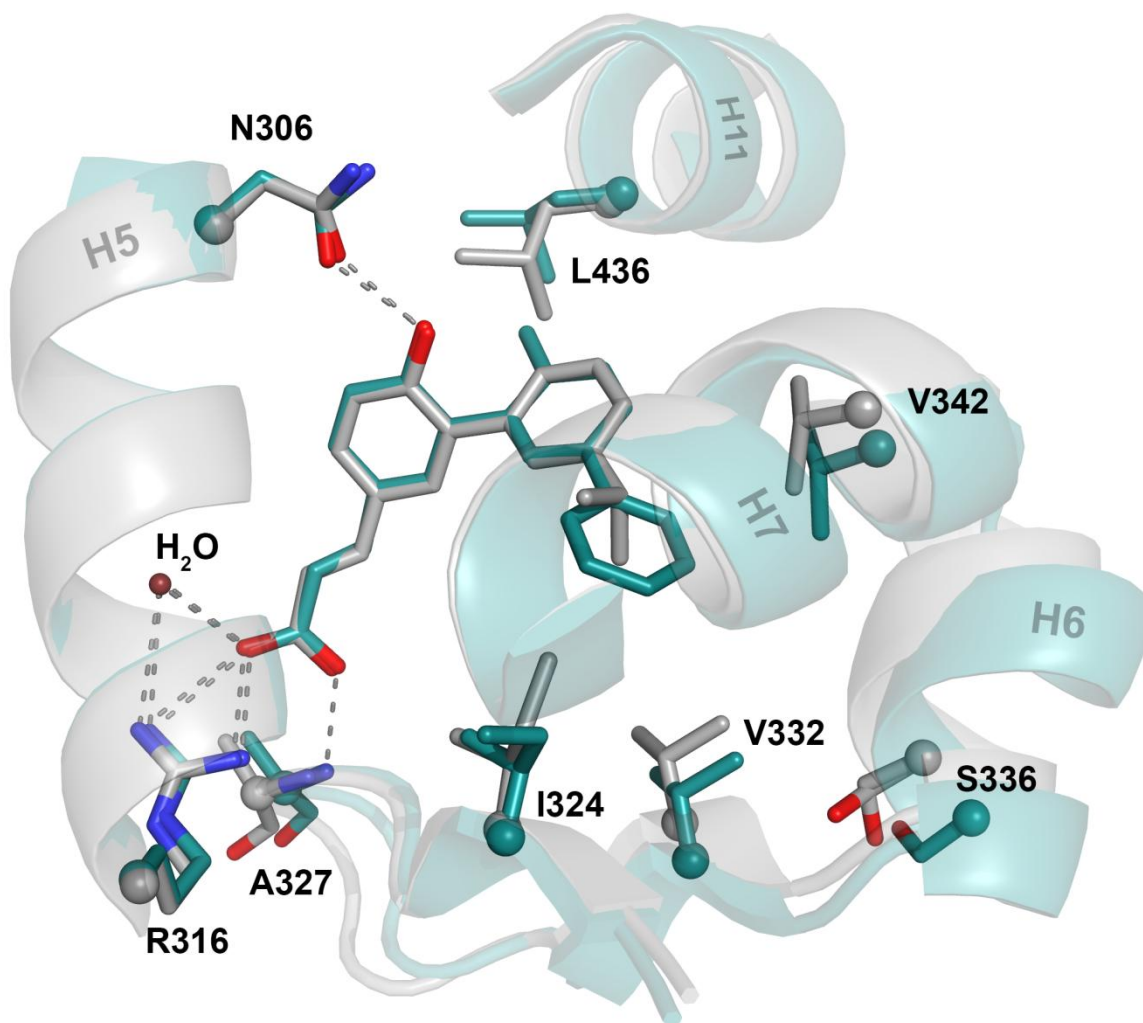

Supplement: cn7b00216_si_001.pdf [file cn7b00216_si_001.pdf]
